# Supplementary material for: The key entity of a DCAR agonist, phosphatidylinositol mannoside Ac1PIM1: its synthesis and immunomodulatory function
Source: Royal Society of Chemistry journal article supplement (doi:10.1039/c9ob02724f), 2020-01-01
Supplement: c9ob02724f1.pdf [file c9ob02724f1.pdf]

## Supplementary Information

### Key entity of DCAR agonist, phosphatidylinositol mannoside Ac<sub>1</sub>PIM<sub>1</sub>; Synthesis and its immunomodulatory function

Yohei Arai,<sup>a</sup> Shota Torigoe,<sup>b</sup> Takanori Matsumaru,<sup>a</sup> Sho Yamasaki<sup>b,c</sup> and Yukari Fujimoto<sup>\*a</sup>

<sup>a</sup>*Graduate School of Science and Technology, Keio University, 3-14-1 Hiyoshi, Kohoku-ku, Yokohama, Kanagawa 223-8522, Japan*

<sup>b</sup>*Department of Molecular Immunology, Research Institute for Microbial Diseases, Osaka University, 3-1 Yamadaoka, Suita, Osaka 565-0871, Japan*

<sup>c</sup>*Laboratory of Molecular Immunology, Immunology Frontier Research Center (WPI-IFReC), Osaka University, 3-1 Yamadaoka, Suita, Osaka 565-0871, Japan*

**Figure S1.** TLR2-specific NF- $\kappa$ B induction by synthesized compounds in A) HEK-Blue mouse TLR2 cells and B) human TLR2 cells.

**Figure S2.** Antigen presenting cell (APC)-free assay for compounds binding to mCD1d.

**Figure S3.** Binding assay based on AlphaScreen<sup>TM</sup>, applied to the synthesized compounds **1**, and **2a–c** in comparison with the known ligands.

**Figure S4.** Proinflammatory cytokine inductions by synthesized compounds in BMDCs. (A) MCP-1 induction. (B) TNF- $\alpha$  induction.

### Experimental Section

1. Synthesis
2. Biology
3. NMR spectra

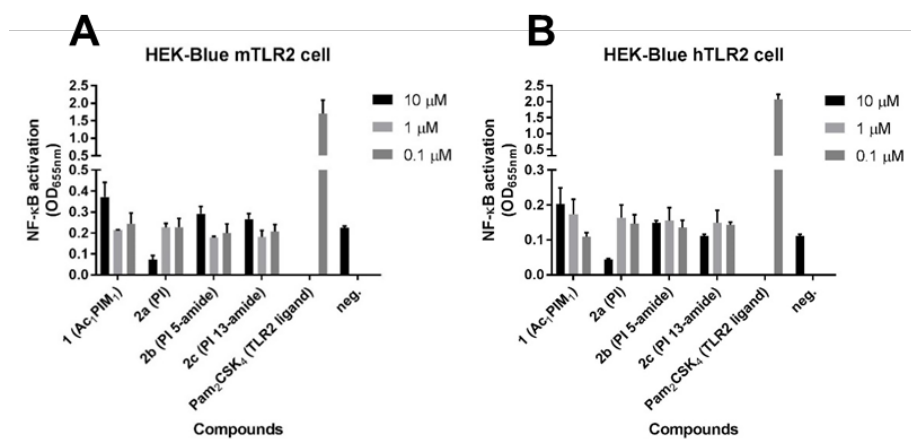

**Figure S1.** TLR2-specific NF- $\kappa$ B induction by synthesized compounds in A) HEK-Blue mouse and B) human TLR2 cells.

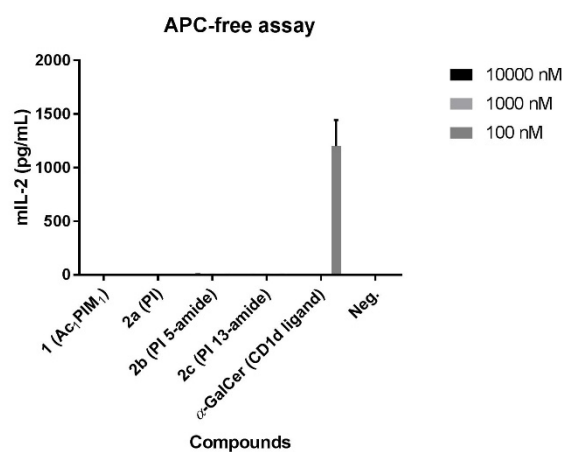

**Figure S2.** Antigen presenting cell (APC)-free assay<sup>1,2</sup> for compounds binding to mCD1d.

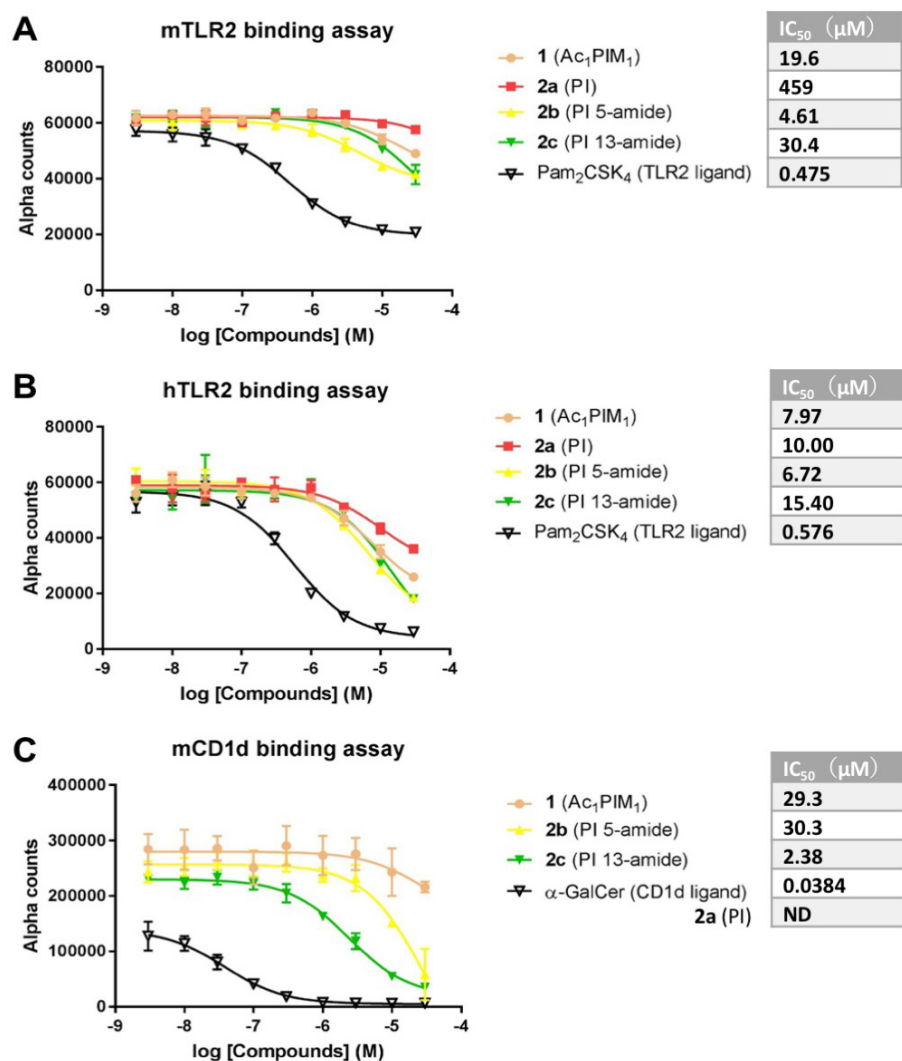

**Figure S3.** Binding assay based on AlphaScreen™, applied to the synthesized compounds **1**, and **2a–c** in comparison with the known ligands.<sup>3,4</sup>

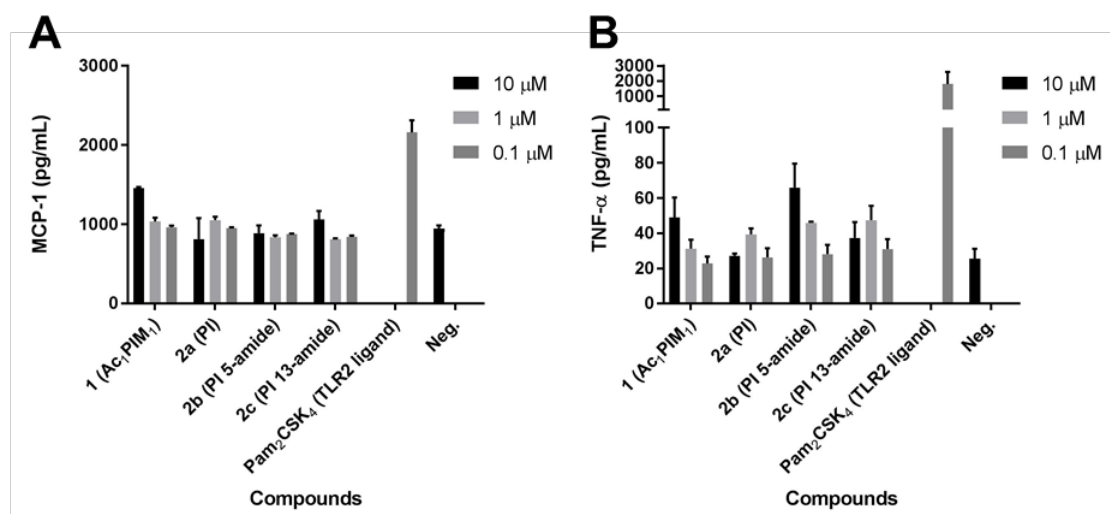

**Figure S4.** Proinflammatory cytokine inductions by synthesized compounds in BMDCs.

(A) MCP-1 induction. (B) TNF- $\alpha$  induction.



## 1. Synthesis

### General procedure:

Nuclear magnetic resonance ( $^1\text{H}$  NMR,  $^{13}\text{C}$  NMR,  $^{31}\text{P}$  NMR) spectra were measured at 25 °C in an indicated solvent with either JEOL ECX 400, ECS 400, JNM-ECZ800R or Bruker AVANCE 800US and analyzed Delta 5.0.5 (JEOL). The proton chemical shifts in  $\text{CDCl}_3$  or in mixture solvent ( $\text{CDCl}_3$ ,  $\text{CD}_3\text{OD}$  and  $\text{D}_2\text{O}$ ) are reported in parts per million ( $\delta$ ) from tetramethylsilane as an internal standard and coupling constants are in Hertz (Hz). The chemical shifts in other solvent are reported in ppm from the residual proton signal of solvent. The chemical shifts for  $^{13}\text{C}$  NMR are reported in ppm from the internal solvent signal ( $\text{CDCl}_3$ ,  $\delta$  77.0). The chemical shifts for  $^{31}\text{P}$  NMR are reported in ppm from the external standard signal ( $\text{H}_3\text{PO}_4$ ,  $\delta$  0.0). High-resolution mass spectra (HRMS) of synthetic compounds were obtained on an electron spray ionization quadrupole time of flight (ESI-QTOF) mass spectrometer (microTOF-QII-HC; BRUKER). Analytical thin layer chromatography (TLC) was performed on Silica gel 60 F<sub>254</sub> Plates (Merck, 0.25 mm thickness). Silica gel column chromatography was performed using Silica gel 60 N [spherical neutral (Kanto Chemical Co., Inc., 40 – 50  $\mu\text{m}$ )] at medium pressure (2 – 4  $\text{kgcm}^{-2}$ ) using indicated solvent systems. Reagents were purchased from commercial supplier (TCI, nacalai tesque, Wako pure chemical industry, Ltd., Kanto Chemical Co., Inc., Watanabe Chemical industries, Ltd.) and were used without further purification. Unless otherwise noted, Non-aqueous reactions were carried out under argon atmosphere. Anhydrous dichloromethane, tetrahydrofuran, *N,N*-dimethylformamide, methanol and toluene were purchased from Kanto Chemical Co., Inc. Chiral HPLC was performed on a Prominence system (Shimadzu Corporation). Chiral HPLC was carried out by using a CHIRALPAK<sup>®</sup> AD-H packed column (5  $\mu\text{m}$ , 4.6 x 250 mm) at a flow rate of 1 ml/min.

### Synthesis of phosphoryl reagent 9b

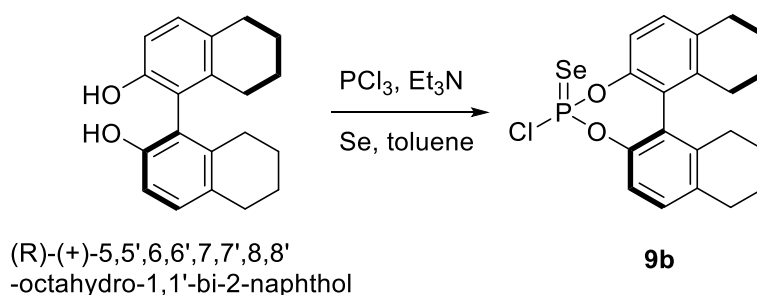

To a solution of  $\text{PCl}_3$  (148  $\mu\text{L}$ , 1.70 mmol) and  $\text{Et}_3\text{N}$  (477  $\mu\text{L}$ , 3.40 mmol) in toluene (3 mL) at 0 °C was added (*R*)-(+)-5,5',6,6',7,7',8,8'-octahydro-1,1'-bi-2-naphthol (500 mg, 1.70 mmol) under Ar. After stirring for 3 min, to the resulting solution was added Se (148 mg, 1.87 mmol). The mixture was warmed to 110 °C and stirred for 6 h. The reaction was concentrated *in vacuo*. The residue was purified by column chromatography of  $\text{SiO}_2$  with *n*-hexane- $\text{CH}_2\text{Cl}_2$  (3:2) to give **9b** (335 mg, 45%) as a pink solid.

**$^1\text{H}$ -NMR (400 MHz,  $\text{CDCl}_3$ )**  $\delta$ : 7.18 (d,  $J$  = 4.3 Hz, 1H), 7.16 (d,  $J$  = 4.1 Hz, 1H), 7.12 (dd,  $J$  = 8.4, 1.8 Hz, 1H), 7.06 (dd,  $J$  = 8.4, 2.3 Hz, 1H), 2.89-2.78 (m, 4H), 2.73-2.64 (m, 2H), 2.33-2.25 (m, 2H), 1.85-1.74 (m, 6H), 1.65-1.54 (m, 2H).

**$^{13}\text{C}$ -NMR (100 MHz,  $\text{CDCl}_3$ )**  $\delta$ : 147.17, 145.36, 138.90, 138.78, 136.85, 136.51, 130.21, 129.98, 126.66, 126.47, 119.12, 118.26, 29.19 (2C), 27.83 (2C), 22.36, 22.34, 22.22, 22.17.

**$^{31}\text{P}$ -NMR (160 MHz,  $\text{CDCl}_3$ )**  $\delta$ : 71.16.

**HRMS (ESI-TOF)** calcd for  $\text{C}_{20}\text{H}_{20}\text{ClNaO}_2\text{PSe}$   $[\text{M}+\text{Na}]^+$  460.9945, found 460.9944.

#### Synthesis of phosphoryl reagent **9c**

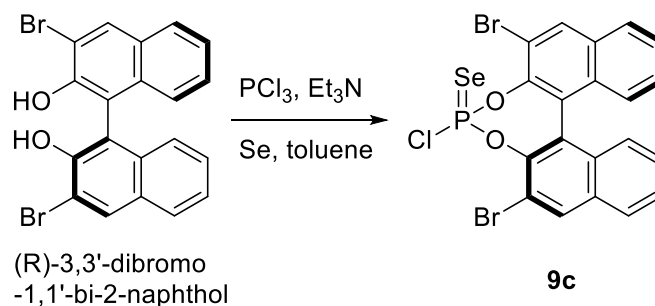

The title compound was synthesized following the procedure for **9b**. (*R*)-3,3'-dibromo-1,1'-bi-2-naphthol (500 mg, 1.13 mmol) was used as starting materials. **9c** (458 mg, 69%) was obtained as a pink solid.

**$^1\text{H}$ -NMR (400 MHz,  $\text{CDCl}_3$ )**  $\delta$ : 8.36 (s, 2H), 7.89 (d,  $J$  = 8.3 Hz, 2H), 7.54 (t,  $J$  = 7.5 Hz, 2H), 7.33 (t,  $J$  = 7.6 Hz, 2H), 7.21 (d,  $J$  = 8.5 Hz, 2H).

**$^{13}\text{C}$ -NMR (100 MHz,  $\text{CDCl}_3$ )**  $\delta$ : 134.47, 134.30, 132.40, 132.23, 131.41, 131.30, 129.01, 128.20, 127.66, 127.65, 127.41, 127.37, 127.27, 127.00, 126.93, 125.27, 124.04, 123.83, 114.26, 113.60.

**$^{31}\text{P}$ -NMR (160 MHz,  $\text{CDCl}_3$ )**  $\delta$ : 64.35.

**HRMS (ESI-TOF)** calcd for  $\text{C}_{20}\text{H}_{10}\text{Br}_2\text{ClNaO}_2\text{PSe}$   $[\text{M}+\text{Na}]^+$  608.7530, found 608.7524.

### Synthesis of phosphoryl reagent 9d

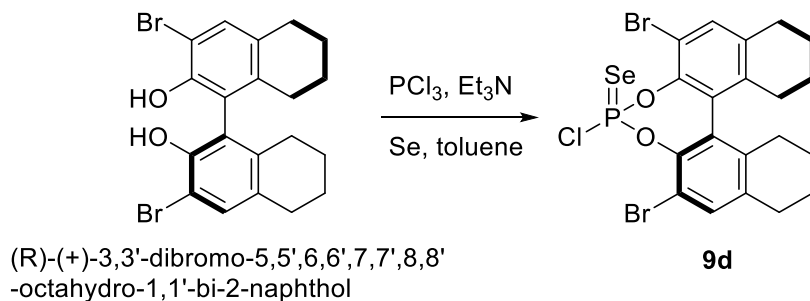

The title compound was synthesized following the procedure for **9b**. (R)-(+)-3,3'-dibromo-5,5',6,6',7,7',8,8'-octahydro-1,1'-bi-2-naphthol (500 mg, 1.106 mmol) was used as starting materials. Compound **9d** (584 mg, 89%) was obtained as a pink solid.

**<sup>1</sup>H-NMR (400 MHz, CDCl<sub>3</sub>)** δ: 7.43 (s, 2H), 2.84-2.79 (m, 4H), 2.59-2.50 (m, 2H), 2.25-2.16 (m, 2H), 1.82-1.75 (m, 6H), 1.63-1.54 (m, 2H).

**<sup>13</sup>C-NMR (100 MHz, CDCl<sub>3</sub>)** δ: 138.03 (2C), 137.86 (2C), 134.17 (2C), 133.90 (2C), 112.40, 112.36, 111.61 (2C), 28.96 (2C), 27.59, 27.55, 22.14, 22.11, 22.02, 21.99.

**<sup>31</sup>P-NMR (160 MHz, CDCl<sub>3</sub>)** δ: 65.01.

**HRMS (ESI-TOF)** calcd for C<sub>20</sub>H<sub>18</sub>Br<sub>2</sub>ClNaO<sub>2</sub>PSe [M+Na]<sup>+</sup> 616.8156, found 616.8153.

### Synthesis of inositol phosphate derivative 11b

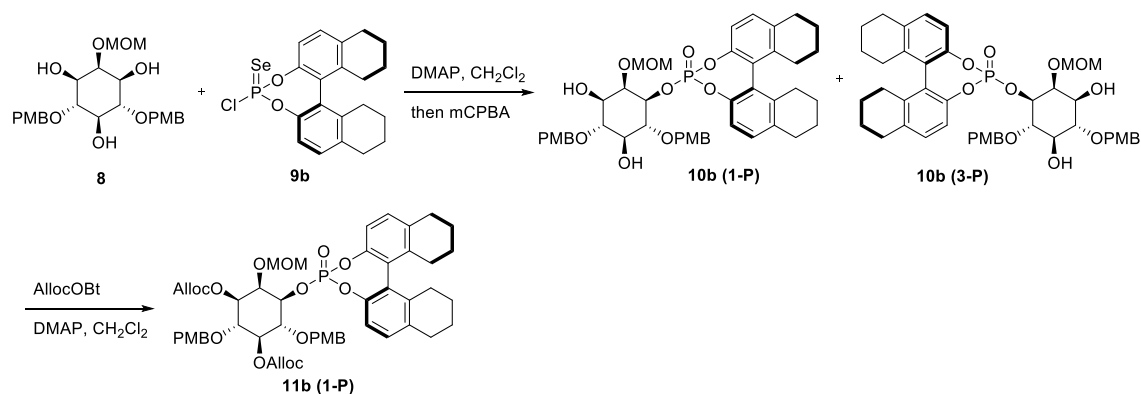

To a stirred solution of **8** (100 mg, 215 μmol) and DMAP (52.6 mg, 431 μmol) in CH<sub>2</sub>Cl<sub>2</sub> (3 mL) at 0 °C was added **9b** (189 mg, 431 μmol). After stirring for overnight at the same temperature, mCPBA (70%) (106 mg, 431 μmol) was added to the reaction mixture. The reaction was extracted with EtOAc

and the extract was washed with H<sub>2</sub>O and brine. The organic phase was dried over Na<sub>2</sub>SO<sub>4</sub>, filtered and concentrated *in vacuo*. The crude mixture was purified by column chromatography of SiO<sub>2</sub> with toluene-EtOAc (2:1 = in vol. ratio) to afford the mixture of **10b (1-P)** and **(3-P)** (32.5 mg, 19%) as a white foam.

To a solution of AllocOBt (83.8 mg, 383 μmol) and DMAP (46.7 mg, 383 μmol) in CH<sub>2</sub>Cl<sub>2</sub> (1 mL) was added **10b (1-P)** and **(3-P)** (32.5 mg, 40.5 μmol). The reaction mixture was stirred for overnight and quenched by an addition of 10% aqueous citric acid. The reaction was extracted with CH<sub>2</sub>Cl<sub>2</sub> and washed with brine and dried over Na<sub>2</sub>SO<sub>4</sub>, filtered and concentrated *in vacuo*. Part of the mixture was analyzed by HPLC [COSMOSIL 5SL-II Packed column, 254 nm, linear gradient of 5–20% (v/v) of IPA in *n*-hexane over 15 min, 1 mL/min] to determine ratio of **11b (1-P)**:**(3-P)** (77:23). The crude mixture was purified by column chromatography of SiO<sub>2</sub> with toluene-EtOAc (6:1) to give the **11b (1-P)** (28.4 mg, 72%) as a white solid.

**<sup>1</sup>H-NMR (400 MHz, CDCl<sub>3</sub>)** δ: 7.17 (d, *J* = 8.5 Hz, 2H), 7.12-7.05 (m, 4H), 7.00-6.85 (m, 2H), 6.81 (d, *J* = 8.5 Hz, 2H), 6.76 (d, *J* = 8.5 Hz, 2H), 5.98-5.79 (m, 2H), 5.37 (dd, *J* = 17.3, 1.3 Hz, 1H), 5.31 (dd, *J* = 17.3, 1.2 Hz, 1H), 5.28 (dd, *J* = 10.3, 1.1 Hz, 1H), 5.21 (dd, *J* = 10.3, 1.1 Hz, 1H), 4.92-4.76 (m, 2H), 4.71 (d, *J* = 6.5 Hz, 1H), 4.65-4.49 (m, 9H), 4.39 (d, *J* = 10.5 Hz, 1H), 4.24 (d, *J* = 10.5 Hz, 1H), 3.97 (t, *J* = 10.0 Hz, 1H), 3.91 (t, *J* = 9.8 Hz, 1H), 3.78 (s, 3H), 3.77 (s, 3H), 3.45 (s, 3H), 2.85-2.58 (m, 6H), 2.27-2.20 (m, 2H), 1.81-1.68 (m, 6H), 1.56-1.46 (m, 2H).

**<sup>13</sup>C-NMR (100 MHz, CDCl<sub>3</sub>)** δ: 159.16 (2C), 154.05, 153.92, 146.82 (2C), 138.46, 136.01, 131.40, 131.36, 130.39, 130.21, 130.01, 129.72, 129.43 (2C), 129.35 (2C), 125.72 (2C), 119.12, 119.02, 113.59 (4C), 113.45 (2C), 98.02, 77.98, 75.85, 75.66, 74.93, 74.80, 74.52, 68.81 (2C), 68.69 (2C), 56.11, 55.22 (2C), 29.06, 29.04, 27.84, 27.79, 22.38, 22.33, 22.25, 22.23.

**<sup>31</sup>P-NMR (160 MHz, CDCl<sub>3</sub>)** δ: -0.83.

**HRMS (ESI-TOF)** calcd for C<sub>52</sub>H<sub>59</sub>NaO<sub>16</sub>P [M+Na]<sup>+</sup> 993.3433, found 993.3442.

### Synthesis of inositol phosphate derivative 11c

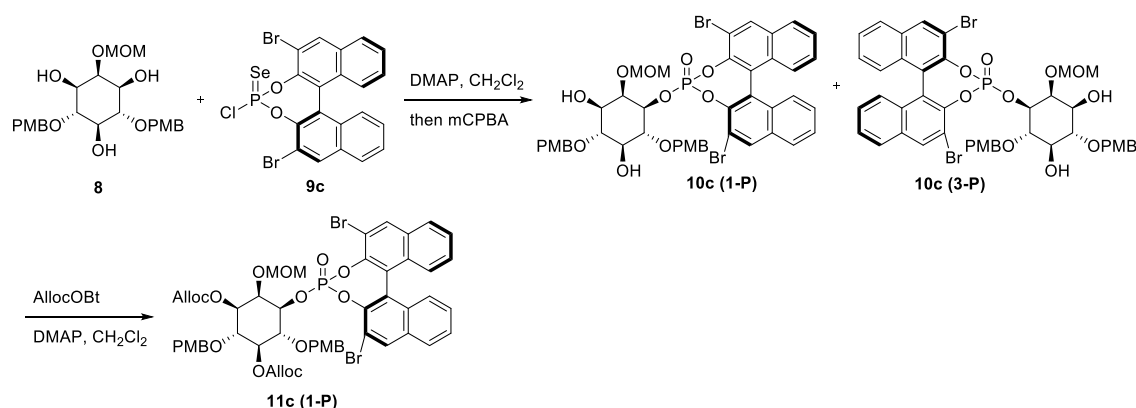

The title compound was synthesized following the procedure for **11b**. **8** (100 mg, 215  $\mu\text{mol}$ ) and **9c** (253 mg, 431  $\mu\text{mol}$ ) were used as starting materials. Compound **10c (1-P)** and **(3-P)** (53.0 mg, 26%) was obtained as a white form. The ratio of **11c (1-P):(3-P)** (81:19) was analyzed by HPLC [COSMOSIL 5SL-II Packed column, 254 nm, linear gradient of 5–20% (v/v) of IPA in *n*-hexane over 15 min, 1 mL/min]. Compound **11c (1-P)** (51.6 mg, 83%) was obtained as a white solid.

**$^1\text{H-NMR}$  (400 MHz,  $\text{CDCl}_3$ )**  $\delta$ : 8.31 (s, 1H), 8.26 (s, 1H), 7.86 (d,  $J = 8.1$  Hz, 1H), 7.78 (d,  $J = 8.3$  Hz, 1H), 7.49 (t,  $J = 7.4$  Hz, 2H), 7.35–7.10 (m, 6H), 6.83–6.79 (m, 2H), 6.59 (d,  $J = 8.5$  Hz, 2H), 6.42 (d,  $J = 8.5$  Hz, 2H), 6.00–5.73 (m, 2H), 5.39 (dd,  $J = 17.3, 1.3$  Hz, 1H), 5.33–5.23 (m, 2H), 5.18 (dd,  $J = 10.3, 1.1$  Hz, 1H), 4.96 (d,  $J = 6.7$  Hz, 1H), 4.89–4.84 (m, 2H), 4.76 (d,  $J = 6.5$  Hz, 1H), 4.74–4.61 (m, 4H), 4.56–4.37 (m, 4H), 4.29 (d,  $J = 11.0$  Hz, 1H), 4.19 (d,  $J = 11.0$  Hz, 1H), 4.09–3.96 (m, 2H), 3.77 (s, 3H), 3.65 (s, 3H), 3.40 (s, 3H).

**$^{13}\text{C-NMR}$  (100 MHz,  $\text{CDCl}_3$ )**  $\delta$ : 159.15, 158.65, 154.01, 153.96, 143.86, 143.00, 134.44, 133.92, 132.30, 131.99, 131.43, 131.39, 131.28, 131.15, 130.01, 129.86, 129.44 (2C), 128.77 (2C), 127.68, 127.62, 127.37, 127.22, 127.14, 126.98, 126.95, 126.77, 122.78, 122.71, 119.06, 118.90, 114.41, 113.73, 113.58 (2C), 113.16 (2C), 98.37, 79.85, 77.87, 77.78, 76.59, 75.80, 75.04, 74.84, 74.64, 68.83, 68.64, 56.16, 55.21, 55.08.

**$^{31}\text{P-NMR}$  (160 MHz,  $\text{CDCl}_3$ )**  $\delta$ : 0.19.

**HRMS (ESI-TOF)** calcd for  $\text{C}_{52}\text{H}_{49}\text{Br}_2\text{NaO}_{16}\text{P}$   $[\text{M}+\text{Na}]^+$  1141.1017, found 1141.1009.

## Synthesis of inositol phosphate derivative 11d

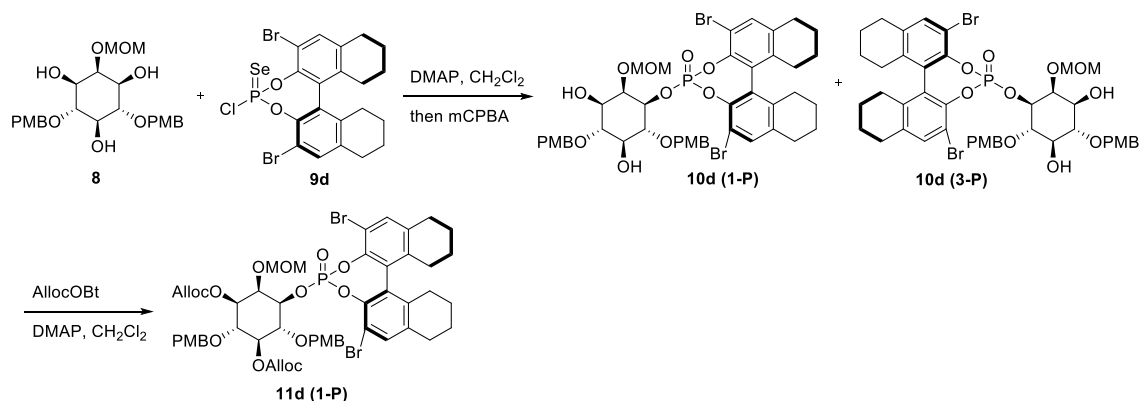

The title compound was synthesized following the procedure for **11b**. **8** (100 mg, 215  $\mu$ mol) and **9d** (257 mg, 431  $\mu$ mol) were used as starting materials. Compound **10d (1-P)** and **(3-P)** (55.7 mg, 27%) was obtained as a white form. The ratio of **11d (1-P):(3-P)** (>99:1) was analyzed by HPLC [COSMOSIL 5SL-II Packed column, 254 nm, linear gradient of 5–20% (v/v) of IPA in *n*-hexane over 15 min, 1 mL/min]. Compound **11d (1-P)** (45.6 mg, 70%) was obtained as a white solid.

**<sup>1</sup>H-NMR (400 MHz, CDCl<sub>3</sub>)**  $\delta$ : 7.40 (s, 1H), 7.32 (s, 1H), 7.23–7.14 (m, 3H), 6.97 (d,  $J$  = 8.5 Hz, 1H), 6.82–6.72 (m, 4H), 5.98–5.74 (m, 2H), 5.39–5.23 (m, 3H), 5.19 (d,  $J$  = 10.5 Hz, 1H), 4.95–4.76 (m, 4H), 4.68–4.34 (m, 9H), 4.29 (d,  $J$  = 11.2 Hz, 1H), 4.08–3.95 (m, 2H), 3.77 (s, 3H), 3.75 (s, 3H), 3.41 (s, 3H), 2.82–2.68 (m, 4H), 2.58–2.44 (m, 2H), 2.23–2.07 (m, 2H), 1.80–1.66 (m, 6H), 1.63–1.39 (m, 2H).

**<sup>13</sup>C-NMR (100 MHz, CDCl<sub>3</sub>)**  $\delta$ : 159.09, 158.86, 153.98, 153.89, 143.47, 142.17, 137.78, 137.51, 134.02, 133.42, 131.40 (2C), 130.33, 130.01, 129.37 (2C), 129.11 (2C), 127.28, 127.10, 125.23, 120.27, 118.96, 118.76, 113.53 (2C), 113.36 (2C), 112.30, 111.38, 98.41, 79.74, 77.94, 77.58, 76.49, 75.69, 74.77, 74.64, 68.74, 68.65, 68.54, 56.08, 55.69, 55.18, 28.83, 28.71, 27.55 (2C), 22.09 (2C), 21.96 (2C).

**<sup>31</sup>P-NMR (160 MHz, CDCl<sub>3</sub>)**  $\delta$ : -2.49.

**HRMS (ESI-TOF)** calcd for C<sub>52</sub>H<sub>57</sub>Br<sub>2</sub>NaO<sub>16</sub>P [M+Na]<sup>+</sup> 1149.1643, found 1149.1647.

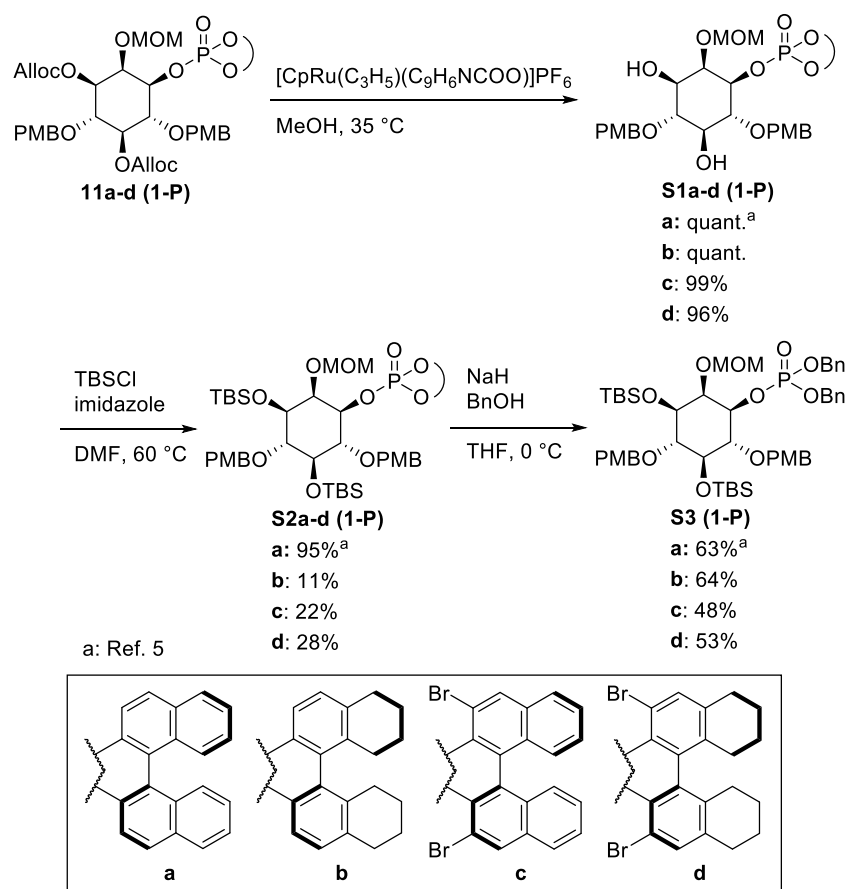

**Scheme S1.** Synthesis of inositol phosphate **29**

### Synthesis of inositol phosphate derivative **S1b**

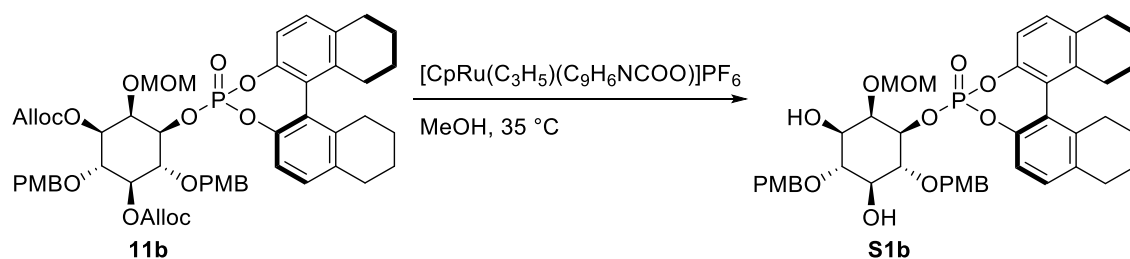

The solution of **11b** (16.0 mg, 16.5  $\mu\text{mol}$ ), and  $[\text{CpRu}(\text{C}_3\text{H}_5)(\text{C}_9\text{H}_6\text{NCOO})]\text{PF}_6$  (173  $\mu\text{g}$ , 0.33  $\mu\text{mol}$ ) in MeOH (1 mL) was stirred at 35  $^\circ\text{C}$ . After stirring for 3 h, the reaction mixture was concentrated under reduced pressure. The crude residue was purified by column chromatography of  $\text{SiO}_2$  with toluene-EtOAc (1:1) to give the **S1b** (16.6 mg, quant.) as a colorless oil.

**$^1\text{H-NMR}$  (400 MHz,  $\text{CDCl}_3$ )**  $\delta$ : 7.37-7.28 (m, 2H), 7.18-7.00 (m, 6H), 6.87 (d,  $J = 8.3$  Hz, 2H), 6.78 (d,  $J = 8.1$  Hz, 2H), 4.92-4.73 (m, 4H), 4.68-4.33 (m, 3H), 4.28 (d,  $J = 10.5$  Hz, 1H), 3.79-3.71 (m,

8H), 3.57-3.42 (m, 5H), 3.30-3.22 (m, 2H), 2.89-2.57 (m, 6H), 2.27-2.17 (m, 2H), 1.83-1.63 (m, 6H), 1.56-1.40 (m, 2H).

**<sup>13</sup>C-NMR (100 MHz, CDCl<sub>3</sub>)** δ: 159.30, 159.18, 146.93, 146.81, 138.43 (2C), 136.05, 135.66, 130.64, 130.46, 129.76 (2C), 129.70, 129.55 (2C), 129.36, 125.82, 125.78, 118.44, 117.75, 113.87 (2C), 113.75 (2C), 98.78, 80.68, 80.49, 79.80, 79.24, 77.20, 74.74, 74.53, 74.17, 70.84, 70.81 (2C), 56.13, 55.74, 55.25, 29.68, 29.07, 29.03, 27.82, 22.38, 22.30, 22.24, 22.22.

**HRMS (ESI-TOF)** calcd for C<sub>44</sub>H<sub>51</sub>NaO<sub>12</sub>P [M+Na]<sup>+</sup> 825.3010, found 825.3011.

#### Synthesis of inositol phosphate derivative S1c

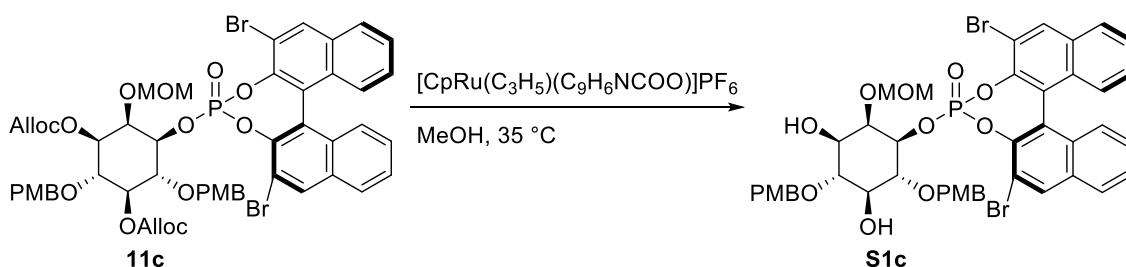

The title compound was synthesized following the procedure for **S1b**. **11c** (32.5 mg, 29.0 μmol) was used as starting materials. Compound **S1c** (27.4 mg, 99%) was obtained as a colorless oil.

**<sup>1</sup>H-NMR (400 MHz, CDCl<sub>3</sub>)** δ: 8.33 (s, 1H), 8.25 (s, 1H), 7.87 (d,  $J = 8.3$  Hz, 1H), 7.78 (d,  $J = 8.3$  Hz, 1H), 7.52 (d,  $J = 7.4$  Hz, 1H), 7.48 (d,  $J = 7.4$  Hz, 1H), 7.38-7.14 (m, 6H), 6.87 (d,  $J = 8.5$  Hz, 2H), 6.71 (d,  $J = 8.5$  Hz, 2H), 6.43 (d,  $J = 8.5$  Hz, 2H), 4.93 (dd,  $J = 11.7, 6.5$  Hz, 2H), 4.86 (d,  $J = 11.2$  Hz, 1H), 4.74 (d,  $J = 11.0$  Hz, 1H), 4.68-4.60 (m, 2H), 4.41 (d,  $J = 10.8$  Hz, 1H), 4.33 (d,  $J = 11.0$  Hz, 1H), 3.84 (t,  $J = 9.2$  Hz, 1H), 3.79 (s, 3H), 3.65 (s, 3H), 3.56-3.47 (m, 3H), 3.43 (s, 3H), 2.36-2.34 (m, 2H).

**<sup>13</sup>C-NMR (100 MHz, CDCl<sub>3</sub>)** δ: 159.26, 158.85, 143.99, 143.05, 134.41, 133.89, 132.28, 131.99, 131.24, 131.17, 130.69, 130.19, 129.74, 129.16, 129.01, 128.99, 128.20, 127.67, 127.62, 127.35, 127.26, 127.09, 126.97, 126.80, 125.27, 122.82, 114.34, 113.84, 113.79, 113.75, 113.71, 113.48, 99.06, 81.33, 80.77, 80.29, 80.04, 74.96, 74.42, 74.11, 70.85, 56.13, 55.25, 55.10.

**HRMS (ESI-TOF)** calcd for C<sub>44</sub>H<sub>41</sub>Br<sub>2</sub>NaO<sub>12</sub>P [M+Na]<sup>+</sup> 973.0595, found 973.0587.

#### Synthesis of inositol phosphate derivative S1d



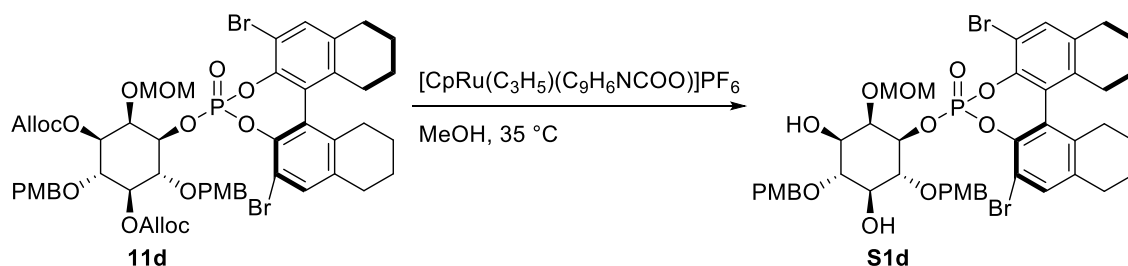

The title compound was synthesized following the procedure for **S1b**. **11d** (33.2 mg, 29.4  $\mu\text{mol}$ ) was used as starting materials. Compound **S1d** (29.4 mg, 96%) was obtained as a colorless oil.

**$^1\text{H}$ -NMR (400 MHz,  $\text{CDCl}_3$ )**  $\delta$ : 7.41 (s, 1H), 7.34-7.29 (m, 3H), 7.28-7.14 (m, 2H), 7.06 (d,  $J = 8.8$  Hz, 1H), 6.90-6.84 (m, 2H), 6.77 (d,  $J = 8.8$  Hz, 1H), 4.90 (s, 2H), 4.82 (t,  $J = 10.7$  Hz, 1H), 4.76 (t,  $J = 11.0$  Hz, 1H), 4.63-4.52 (m, 2H), 4.48-4.38 (m, 1H), 4.22 (d,  $J = 11.2$  Hz, 1H), 3.85-3.80 (m, 2H), 3.79 (s, 3H), 3.76 (s, 3H), 3.60-3.51 (m, 3H), 3.42 (s, 3H), 3.24 (s, 1H), 2.84-2.69 (m, 3H), 2.58-2.47 (m, 3H), 2.22-2.08 (m, 2H), 1.81-1.39 (m, 8H).

**$^{13}\text{C}$ -NMR (100 MHz,  $\text{CDCl}_3$ )**  $\delta$ : 159.23, 159.15, 137.77, 137.56, 137.12, 134.01, 133.43, 130.75, 130.63, 129.73, 129.71, 129.34, 129.32, 129.02, 128.21, 127.31, 127.26, 125.27, 113.84, 113.81, 113.78, 112.21, 111.48, 99.11, 81.23, 80.62, 80.22, 80.16, 74.67, 74.38, 73.89, 70.74, 56.10, 55.25, 28.86, 28.76, 27.57, 22.12, 22.01.

**HRMS (ESI-TOF)** calcd for  $\text{C}_{44}\text{H}_{49}\text{Br}_2\text{NaO}_{12}\text{P}$   $[\text{M}+\text{Na}]^+$  981.1221, found 981.1215.

#### Synthesis of inositol phosphate derivative **S2b**

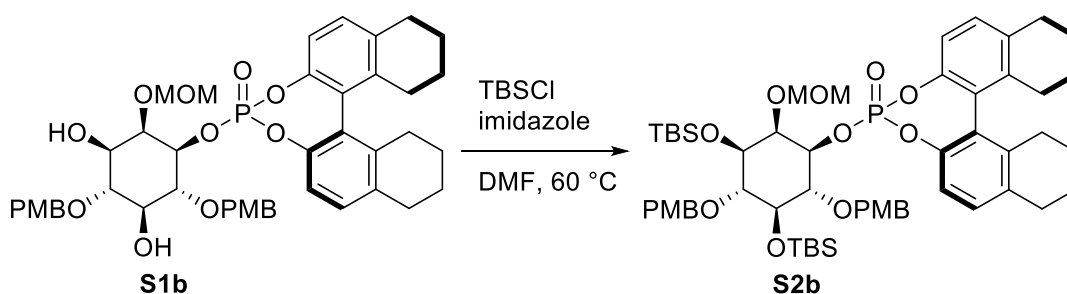

To a solution of **S1b** (16.6 mg, 20.7  $\mu\text{mol}$ ) in DMF (1 mL) at room temperature were added TBSCl (31.2 mg, 207  $\mu\text{mol}$ ) and imidazole (16.9 mg, 248  $\mu\text{mol}$ ). The mixture was warmed up to 60  $^\circ\text{C}$ . After stirring for 1 d, methanol was added to the reaction, and then extracted with  $\text{Et}_2\text{O}$  and washed with brine. The organic phase was dried over  $\text{Na}_2\text{SO}_4$ , filtered and concentrated *in vacuo*. The residue was purified by column chromatography of  $\text{SiO}_2$  with toluene- $\text{EtOAc}$  (10:1) to give **S2b** (2.73 mg, 11%)

as a colorless oil.

**<sup>1</sup>H-NMR (400 MHz, CDCl<sub>3</sub>)** δ: 7.42-7.36 (m, 2H), 7.19 (d, *J* = 8.5 Hz, 2H), 7.13 (d, *J* = 8.5 Hz, 2H), 7.04-6.97 (m, 2H), 6.82 (d, *J* = 8.8 Hz, 2H), 6.71 (d, *J* = 8.5 Hz, 2H), 5.39-5.30 (m, 2H), 5.04-4.82 (m, 3H), 4.75-4.61 (m, 1H), 4.44-4.28 (m, 3H), 3.79 (s, 3H), 3.74 (s, 3H), 3.64 (t, *J* = 9.0 Hz, 2H), 3.50 (s, 3H), 3.43 (t, *J* = 8.9 Hz, 1H), 2.96-2.51 (m, 4H), 2.06-1.94 (m, 2H), 1.77-1.60 (m, 10H), 0.82 (s, 9H), 0.78 (s, 9H), 0.10 (s, 3H), -0.03 (s, 3H), -0.17 (s, 3H), -0.18 (s, 3H).

**<sup>13</sup>C-NMR (100 MHz, CDCl<sub>3</sub>)** δ: 158.49, 158.13, 146.80 (2C), 138.21, 138.14, 131.28, 130.96, 130.22, 130.01, 129.56, 128.84 (3C), 127.37 (3C), 125.85, 118.44, 118.40, 113.18 (2C), 113.07 (2C), 97.90, 81.59, 80.06, 77.84, 77.20, 74.80, 74.66, 74.61, 73.20, 56.06, 55.20, 55.13, 31.92, 29.68, 29.51, 29.31, 29.06, 27.77, 25.95 (2C), 25.89 (2C), 22.68, 22.41, 22.25, 22.10, -0.01, -3.98, -4.33, -4.90.

**HRMS (ESI-TOF)** calcd for C<sub>56</sub>H<sub>79</sub>NaO<sub>12</sub>PSi<sub>2</sub> [M+Na]<sup>+</sup> 1053.4740, found 1053.4736.

#### Synthesis of inositol phosphate derivative S2c

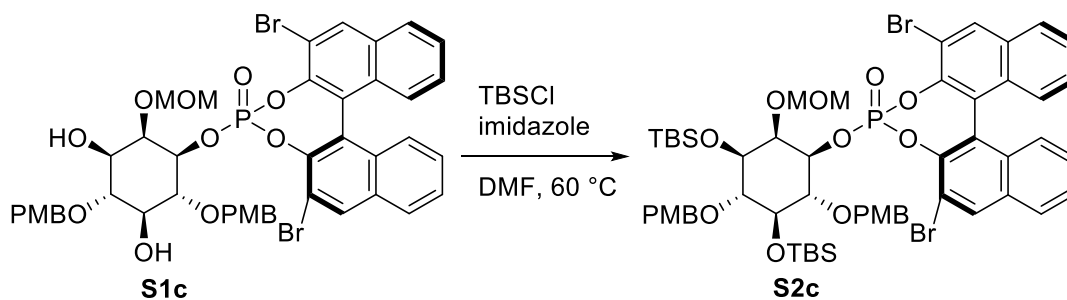

The title compound was synthesized following the procedure for **S2b**. **S1c** (27.4 mg, 28.8 μmol) was used as starting materials. Compound **S2c** (7.46 mg, 22%) was obtained as a colorless oil.

**<sup>1</sup>H-NMR (400 MHz, CDCl<sub>3</sub>)** δ: 8.23 (s, 1H), 8.14 (s, 1H), 7.80 (d, *J* = 7.7 Hz, 1H), 7.62 (d, *J* = 7.7 Hz, 1H), 7.43 (t, *J* = 7.0 Hz, 1H), 7.28-7.23 (m, 8H), 7.13 (t, *J* = 7.0 Hz, 1H), 6.94 (d, *J* = 7.7 Hz, 2H), 6.85 (d, *J* = 8.2 Hz, 2H), 4.72-4.69 (m, 1H), 4.58-4.45 (m, 4H), 4.34-4.28 (m, 3H), 3.89-3.83 (m, 4H), 3.80 (s, 3H), 3.75-3.70 (m, 1H), 3.56-3.50 (m, 1H), 3.41 (s, 3H), 3.28-3.21 (m, 1H), 0.74 (s, 9H), 0.70 (s, 9H), -0.09 (s, 3H), -0.17 (s, 3H), -0.21 (s, 3H), -0.81 (s, 3H).

**<sup>13</sup>C-NMR (100 MHz, CDCl<sub>3</sub>)** δ: 159.47, 159.30, 148.73, 147.63, 133.81, 132.81, 132.60, 129.82 (3C), 129.67 (3C), 129.46, 129.28, 127.11, 126.99, 126.82, 126.78, 126.68, 126.48, 126.10, 125.98, 124.87, 122.98, 122.25, 116.78, 113.91 (2C), 113.77 (2C), 111.37, 95.01, 81.79, 80.97, 80.79, 79.85, 75.38, 72.14, 71.49, 70.94, 55.90, 55.35, 55.26, 26.11 (3C), 25.76 (3C), 18.69, 18.00, -3.12, -3.72, -4.78, -

4.86.

**HRMS (ESI-TOF)** calcd for  $C_{56}H_{69}Br_2NaO_{12}PSI_2$   $[M+Na]^+$  1201.2324, found 1201.2325.

#### Synthesis of inositol phosphate derivative **S2d**

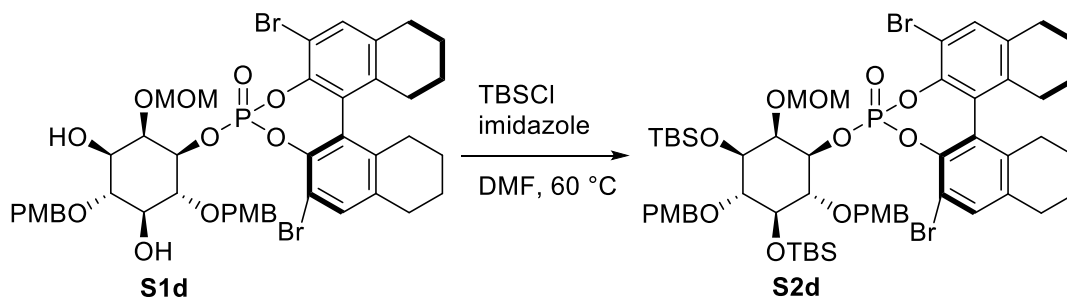

The title compound was synthesized following the procedure for **S2b**. **S1d** (29.4 mg, 30.6  $\mu$ mol) was used as starting materials. Compound **S2d** (10.01 mg, 28%) was obtained as a colorless oil.

**$^1H$ -NMR (400 MHz,  $CDCl_3$ )**  $\delta$ : 7.40 (s, 1H), 7.23-7.11 (m, 3H), 6.96 (d,  $J$  = 7.9 Hz, 2H), 6.83 (d,  $J$  = 7.7 Hz, 2H), 6.64 (d,  $J$  = 8.4 Hz, 2H), 5.06-4.93 (m, 2H), 4.87 (t,  $J$  = 10.5 Hz, 1H), 4.69 (t,  $J$  = 11.2 Hz, 1H), 4.56 (d,  $J$  = 8.6 Hz, 2H), 4.30 (dt,  $J$  = 37.5, 12.5 Hz, 2H), 3.87-3.78 (m, 5H), 3.74 (s, 3H), 3.66-3.56 (m, 2H), 3.50 (s, 3H), 2.84-1.68 (m, 16H), 0.85 (s, 9H), 0.75 (s, 9H), 0.14 (s, 3H), 0.00 (s, 3H), -0.18 (s, 3H), -0.27 (s, 3H).

**$^{13}C$ -NMR (100 MHz,  $CDCl_3$ )**  $\delta$ : 158.26, 158.10, 137.62, 137.35 (2C), 136.82, 133.79 (2C), 133.28 (2C), 131.32, 131.07, 128.45 (3C), 127.45 (3C), 113.24, 113.06 (2C), 113.00 (2C), 111.14, 98.35, 81.27, 80.44, 77.67, 77.20, 74.79, 74.55, 74.37, 73.17, 56.24, 55.13 (2C), 29.65, 28.88, 28.61, 27.52, 27.26, 26.01, 25.90 (6C), 22.16, 21.98, 18.07, 17.91, -4.05, -4.09, -4.40, -4.76.

**HRMS (ESI-TOF)** calcd for  $C_{56}H_{77}Br_2NaO_{12}PSI_2$   $[M+Na]^+$  1209.2950, found 1209.2955.

#### Synthesis of inositol phosphate derivative **S3** from **S2b**

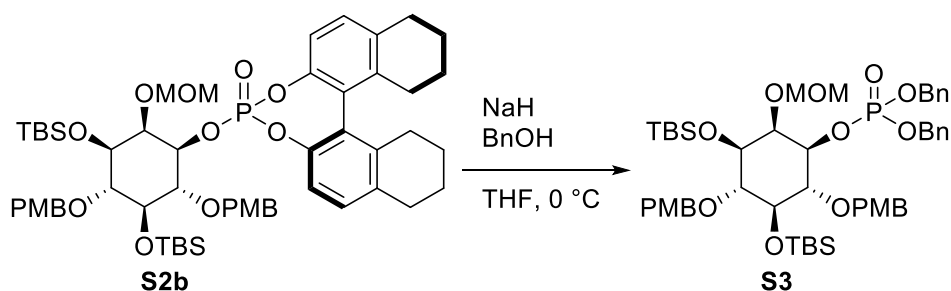

To a suspension of NaH (60% oil dispersion) (0.275 mg, 6.90  $\mu\text{mol}$ ) in THF (0.5 mL) at 0  $^{\circ}\text{C}$  was added benzyl alcohol (0.785  $\mu\text{L}$ , 7.59  $\mu\text{mol}$ ). After stirring for 30 min, the reaction was added to the solution of **S2b** (2.37 mg, 2.30  $\mu\text{mol}$ ) in THF (0.5 mL) at 0  $^{\circ}\text{C}$ . The reaction mixture was warmed up to room temperature, and stirred for 1.5 h. The reaction was cooled to 0  $^{\circ}\text{C}$ , and then quenched with 10% aqueous citric acid. The mixture was extracted with ethyl acetate. The organic solution was washed with sat.  $\text{NaHCO}_3$  aq. and brine, dried over  $\text{Na}_2\text{SO}_4$ , filtered and concentrated *in vacuo*. The residue was purified by column chromatography of  $\text{SiO}_2$  with toluene-EtOAc (15:1) to give the compound **S3** (1.40 mg, 64%) as a colorless oil.

$^1\text{H}$  NMR spectra was consistent with literature data.<sup>5</sup>

#### Synthesis of inositol phosphate derivative **S3** from **S2c**

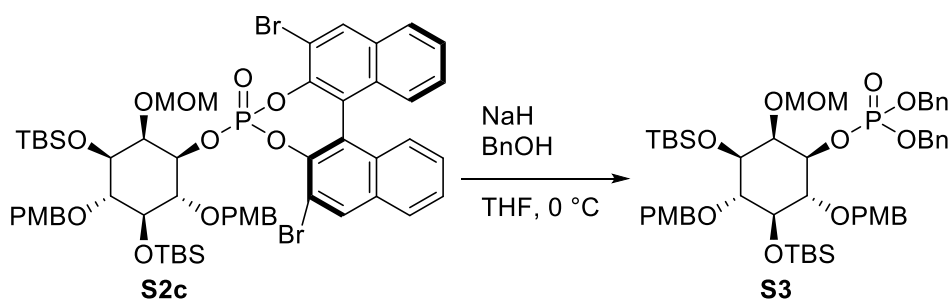

The title compound was synthesized following the procedure for **S3** from **S2b**. **S2c** (5.95 mg, 5.04  $\mu\text{mol}$ ) was used as starting materials. Compound **S3** (2.31 mg, 48%) was obtained as a colorless oil.

$^1\text{H}$  NMR spectra was consistent with literature data.<sup>5</sup>

#### Synthesis of inositol phosphate derivative **S3** from **S2d**

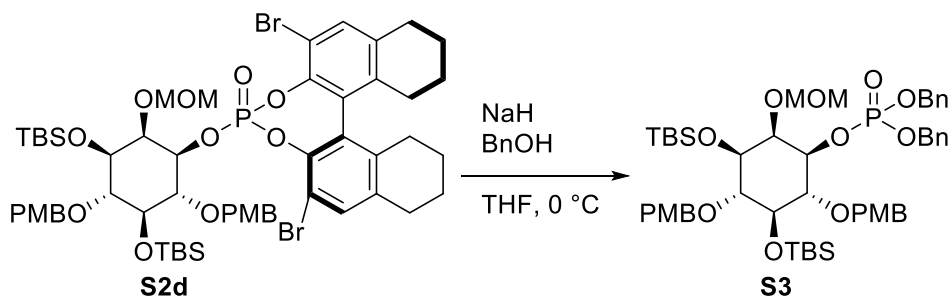

The title compound was synthesized following the procedure for **S3** from **S2b**. **S2d** (4.61 mg, 3.88  $\mu$ mol) was used as starting materials. Compound **S3** (1.96 mg, 53%) was obtained as a colorless oil. <sup>1</sup>H NMR spectra was consistent with literature data.<sup>5</sup>

### Synthesis of mannose derivative S4

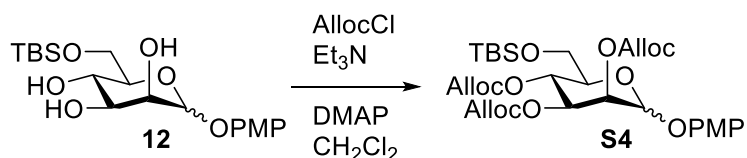

To a solution of **12**<sup>6</sup> (3.37 g, 8.41 mmol), Et<sub>3</sub>N (5.91 mL, 42.1 mmol) and DMAP (514 mg, 4.21 mmol) in CH<sub>2</sub>Cl<sub>2</sub> (20 mL) was added AllocCl (4.47 mL, 42.1 mmol). The resulting mixture was stirred at room temperature for overnight. The reaction was quenched by an addition of sat. NaHCO<sub>3</sub> aq. and extracted with CHCl<sub>3</sub>. Organic layer was washed with 10% citric acid aq. and brine and dried over Na<sub>2</sub>SO<sub>4</sub>, filtered and concentrated *in vacuo*. The residue was purified by column chromatography of SiO<sub>2</sub> with *n*-hexane-EtOAc (5:1) to give **S4** (3.06 g, 56%) as a colorless oil.

**<sup>1</sup>H-NMR (400 MHz, CDCl<sub>3</sub>)** δ: 7.04 (td, *J* = 6.3, 4.0 Hz, 2H), 6.81 (td, *J* = 6.3, 4.0 Hz, 2H), 5.98-5.85 (m, 3H), 5.47 (d, *J* = 1.8 Hz, 1H), 5.43-5.20 (m, 9H), 4.67-4.62 (m, 6H), 4.02 (ddd, *J* = 10.1, 5.2, 2.7 Hz, 1H), 3.80-3.71 (m, 5H), 0.87-0.85 (m, 9H), 0.02 (s, 3H), 0.01 (s, 3H).

**<sup>13</sup>C-NMR (100 MHz, CDCl<sub>3</sub>)** δ: 155.39, 154.22, 153.91, 149.87 (2C), 131.31, 131.22, 131.05, 119.19, 118.96, 118.89, 118.18 (2C), 114.59 (2C), 96.41, 73.15, 72.74, 71.65, 70.31, 69.06, 68.93, 68.81, 62.20, 55.61, 25.77 (3C), 18.19, -5.49 (2C).

**HRMS (ESI-TOF)** calcd for  $\text{C}_{31}\text{H}_{44}\text{NaO}_{13}\text{Si}$   $[\text{M}+\text{Na}]^+$  675.2443, found 675.2451.

### Synthesis of mannose derivative 13

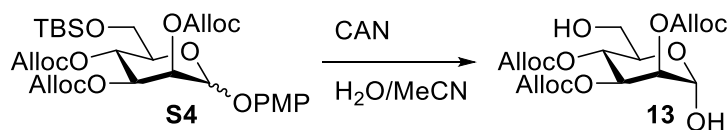

To a solution of **S4** (2.25 g, 3.45 mmol) in MeCN/H<sub>2</sub>O (4:1) (30 mL) at 0 °C was added CAN (5.67 g, 10.3 mmol) and stirred for overnight. The reaction was poured into water and extracted with EtOAc. Organic layer was washed with brine and dried over Na<sub>2</sub>SO<sub>4</sub>, filtered and concentrated *in vacuo*. The residue was purified by column chromatography of SiO<sub>2</sub> with toluene-EtOAc (1:1) to give **13** (640 mg, 43%) as a colorless oil.

**<sup>1</sup>H-NMR (400 MHz, CDCl<sub>3</sub>)** δ: 5.99-5.87 (m, 3H), 5.41-5.23 (m, 9H), 5.14 (t, *J* = 10.1 Hz, 1H), 4.66-4.62 (m, 6H), 4.09 (ddd, *J* = 9.9, 4.3, 2.5 Hz, 1H), 3.85 (d, *J* = 3.8 Hz, 1H), 3.80-3.70 (m, 2H), 2.64 (t, *J* = 6.5 Hz, 1H).

**<sup>13</sup>C-NMR (100 MHz, CDCl<sub>3</sub>)** δ: 154.26 (2C), 153.79, 131.24, 131.02, 130.96, 119.44, 119.36, 118.96, 91.93, 73.19, 72.51, 70.43, 70.07, 69.17 (2C), 68.96, 61.23.

**HRMS (ESI-TOF)** calcd for C<sub>18</sub>H<sub>24</sub>NaO<sub>12</sub> [M+Na]<sup>+</sup> 455.1160, found 455.1169.

#### Synthesis of mannose derivative **S5**

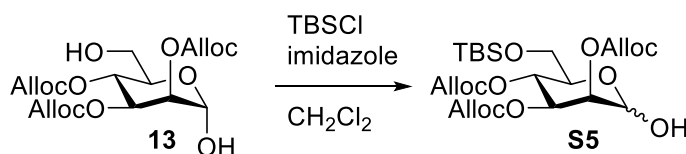

To a solution of **13** (1.70 g, 3.93 mmol) and TBSCl (652 mg, 4.33 mmol) in CH<sub>2</sub>Cl<sub>2</sub> (50 mL) was added imidazole (293 mg, 4.33 mmol). The resulting mixture was stirred at room temperature for overnight. The reaction was quenched by an addition of water and extracted with EtOAc. Organic layer was washed with brine and dried over Na<sub>2</sub>SO<sub>4</sub>, filtered and concentrated *in vacuo*. The residue was purified by column chromatography of SiO<sub>2</sub> with toluene-EtOAc (3:1) to give **S5** (1.69 g, 79%) as white solid.

**<sup>1</sup>H-NMR (400 MHz, CDCl<sub>3</sub>)** δ: 5.97-5.86 (m, 3H), 5.40-5.23 (m, 8H), 5.20 (dd, *J* = 3.3, 1.9 Hz, 1H), 5.10 (t, *J* = 10.1 Hz, 1H), 4.64-4.61 (m, 6H), 4.12-4.08 (m, 1H), 4.05 (d, *J* = 4.3 Hz, 1H), 3.84-3.72 (m, 2H), 0.90-0.87 (m, 9H), 0.07 (s, 3H), 0.06 (s, 3H).

**<sup>13</sup>C-NMR (100 MHz, CDCl<sub>3</sub>)** δ: 154.24, 153.97, 153.79, 131.31, 131.17, 131.10, 119.11, 119.01, 118.77, 91.76, 73.23, 72.93, 71.16, 70.52, 68.95, 68.83, 68.78, 62.72, 25.87 (3C), 18.41, -5.41, -5.49.

**HRMS (ESI-TOF)** calcd for  $C_{24}H_{38}NaO_{12}Si$   $[M+Na]^+$  569.2025, found 569.2033.

#### Synthesis of mannose derivative **5**

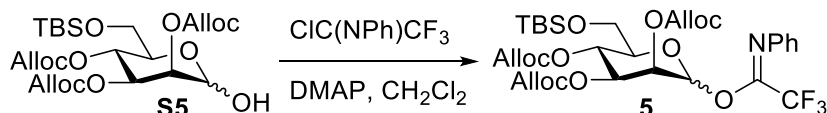

To the solution of the **S5** (356 mg, 651  $\mu$ mol) and  $ClC(NPh)CF_3$  (87.9  $\mu$ L, 542  $\mu$ mol) in  $CH_2Cl_2$  (5 mL) was added DMAP (66.2 mg, 542  $\mu$ mol). After stirring for 6 h, the reaction mixture was purified by column chromatography of  $SiO_2$  with toluene-EtOAc (9:1) to give **5** (419 mg, quant.) as a colorless oil.

**$^1H$ -NMR (400 MHz,  $CDCl_3$ )**  $\delta$ : 7.34-7.28 (m, 2H), 7.14-7.10 (m, 1H), 6.83 (d,  $J$  = 7.6 Hz, 2H), 6.38 (s, 1H), 5.97-5.87 (m, 3H), 5.40-5.26 (m, 9H), 4.66-4.62 (m, 6H), 4.02-3.95 (m, 1H), 3.81 (d,  $J$  = 3.6 Hz, 2H), 0.89 (s, 9H), 0.06 (s, 3H), 0.05 (s, 3H).

**$^{13}C$ -NMR (100 MHz,  $CDCl_3$ )**  $\delta$ : 154.00, 153.78, 153.72, 142.89, 131.20, 131.11, 130.89, 128.80 (2C), 124.62, 119.31 (3C), 119.12, 118.97, 73.69, 72.82, 71.16, 69.47 (2C), 69.23 (2C), 69.04, 68.95 (2C), 61.96, 25.76, 18.21 (3C), -5.41, -5.45.

**HRMS (ESI-TOF)** calcd for  $C_{32}H_{42}F_3NNaO_{12}Si$   $[M+Na]^+$  740.2321, found 740.2327.

#### Synthesis of inositol phosphate derivative **15**

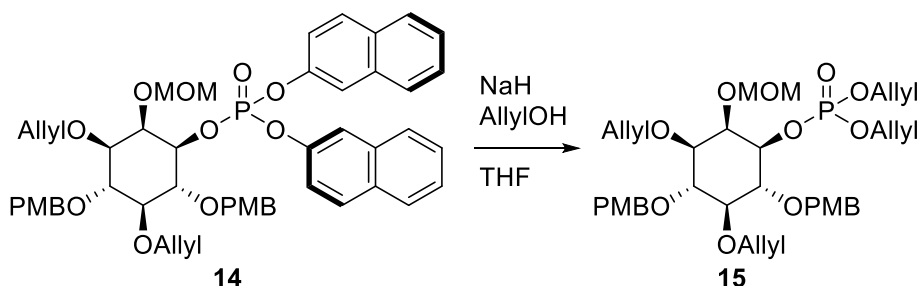

To a suspension of NaH (60% oil dispersion) (229 mg, 5.71 mmol) in THF (15 mL) at 0  $^{\circ}C$  was added allyl alcohol (435  $\mu$ L, 6.40 mmol). After stirring for 30 min, the reaction was added to the solution of **14**<sup>7</sup> (2.00 g, 2.29 mmol) in THF (35 mL) at 0  $^{\circ}C$ . The reaction mixture was warmed up to room temperature, and stirred for 1.5 h. The reaction was cooled to 0  $^{\circ}C$ , and then quenched with 10%

aqueous citric acid. The mixture was extracted with ethyl acetate. The organic solution was washed with sat. NaHCO<sub>3</sub> aq. and brine, dried over Na<sub>2</sub>SO<sub>4</sub>, filtered and concentrated *in vacuo*. The residue was purified by column chromatography of SiO<sub>2</sub> with *n*-hexane-EtOAc (5:1) to give the compound **15** (1.10 g, 68%) as a colorless oil.

**<sup>1</sup>H-NMR (400 MHz, CDCl<sub>3</sub>)**  $\delta$ : 7.32-7.26 (m, 4H), 6.85 (t, *J* = 8.6 Hz, 4H), 6.01-5.77 (m, 4H), 5.35-5.14 (m, 8H), 4.83-4.75 (m, 4H), 4.70 (t, *J* = 10.1 Hz, 2H), 4.55-4.44 (m, 4H), 4.36 (dd, *J* = 12.3, 5.4 Hz, 1H), 4.32-4.27 (m, 2H), 4.19 (dd, *J* = 12.6, 5.4 Hz, 1H), 4.15-4.11 (m, 1H), 4.07 (dd, *J* = 12.6, 5.4 Hz, 1H), 3.90 (t, *J* = 9.6 Hz, 1H), 3.84 (t, *J* = 9.5 Hz, 1H), 3.80 (s, 3H), 3.79 (s, 3H), 3.44 (s, 3H), 3.29-3.23 (m, 2H).

**<sup>13</sup>C-NMR (100 MHz, CDCl<sub>3</sub>)**  $\delta$ : 159.18, 159.04, 135.16, 134.57, 132.47, 132.39, 130.87, 130.69, 129.85 (2C), 129.49 (2C), 118.12, 118.00, 116.82, 116.39, 113.73 (2C), 113.57 (2C), 97.48, 82.70, 80.92, 79.58, 79.28, 77.83, 75.59, 75.25, 74.53, 73.73, 71.35, 68.20, 68.10, 55.81, 55.25, 55.23.

**<sup>31</sup>P-NMR (160 MHz, CDCl<sub>3</sub>)**  $\delta$ : -1.02.

**HRMS (ESI-TOF)** calcd for C<sub>36</sub>H<sub>49</sub>NaO<sub>12</sub>P [M+Na]<sup>+</sup> 727.2854, found 727.2861.

#### Synthesis of inositol phosphate derivative **16**

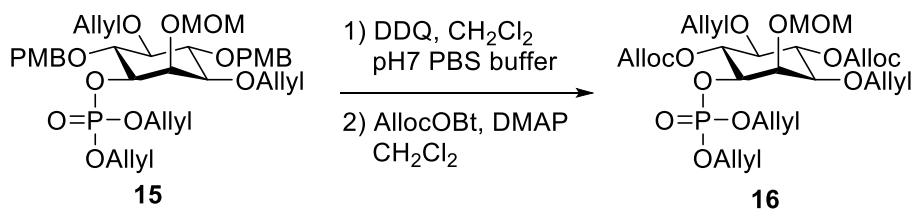

To a stirred mixture of **15** (900 mg, 1.28 mmol) in CH<sub>2</sub>Cl<sub>2</sub> (34.5 mL) and pH 7 phosphate buffer (3.83 mL) was added DDQ (870 mg, 3.83 mmol). After stirring for 4 h, the reaction mixture was extracted with CHCl<sub>3</sub> and washed with sat. NaHCO<sub>3</sub> aq. and brine, dried over Na<sub>2</sub>SO<sub>4</sub>, filtrated and concentrated *in vacuo*. The residue was purified by column chromatography of SiO<sub>2</sub> with toluene-EtOAc (1:1) to give PMB group deprotected compound (560 mg, 94 %) as a colorless oil. To a PMB group deprotected compound (560 mg, 1.20 mmol) and AllocOBt (1.31 g, 6.00 mmol) in CH<sub>2</sub>Cl<sub>2</sub> (15 mL) was added DMAP (733 mg, 6.00 mmol) and the mixture was stirred for 4 h. The reaction was quenched by addition of 10% citric acid aq. and extracted with CHCl<sub>3</sub>. The organic layer was washed with brine, dried over Na<sub>2</sub>SO<sub>4</sub>, filtrated and concentrated *in vacuo*. The crude mixture was purified by column chromatography of SiO<sub>2</sub> with toluene-EtOAc (3:1) to give **16** (422 mg, 56 %) as



a colorless oil.

**<sup>1</sup>H-NMR (400 MHz, CDCl<sub>3</sub>)** δ: 5.98-5.74 (m, 6H), 5.40-5.15 (m, 13H), 5.12 (dd, *J* = 10.4, 1.5 Hz, 1H), 4.78 (s, 2H), 4.67-4.63 (m, 3H), 4.61 (dt, *J* = 5.8, 1.3 Hz, 1H), 4.58-4.50 (m, 4H), 4.37-4.31 (m, 2H), 4.19-4.11 (m, 3H), 3.94 (ddt, *J* = 12.9, 5.5, 1.4 Hz, 1H), 3.45 (t, *J* = 9.5 Hz, 1H), 3.40 (s, 3H), 3.34 (dd, *J* = 10.2, 2.1 Hz, 1H).

**<sup>13</sup>C-NMR (100 MHz, CDCl<sub>3</sub>)** δ: 154.27, 154.21, 134.16, 133.80, 132.17, 132.09, 131.45, 131.33, 119.02, 118.94, 118.36, 118.25, 117.30, 117.06, 97.35, 78.08, 76.53, 76.17, 75.22, 73.62, 72.65, 72.62, 70.97, 68.73, 68.61, 68.38, 68.31, 55.92.

**<sup>31</sup>P-NMR (160 MHz, CDCl<sub>3</sub>)** δ: -1.04.

**HRMS (ESI-TOF)** calcd for C<sub>28</sub>H<sub>41</sub>NaO<sub>14</sub>P [M+Na]<sup>+</sup> 655.2126, found 655.2135.

### Synthesis of 17

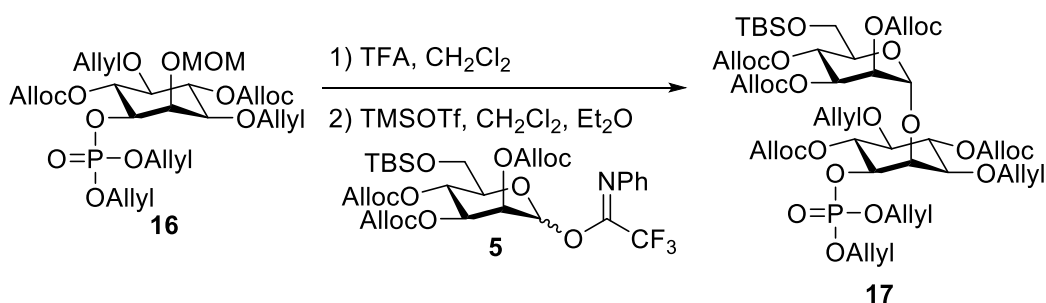

The solution of **16** (775 mg, 1.23 mmol) in CH<sub>2</sub>Cl<sub>2</sub> (15 mL) was cooled to 0 °C. To the solution was added TFA (15 mL) at 0 °C and stirred for 1h. The solvent removed under reduced pressure and added toluene then concentrated *in vacuo* to give the de-2-*O*-MOM compound (629 mg, 87%). The de-2-*O*-MOM compound (124 mg, 211 μmol) and **5** (313 mg, 435 μmol) were co-evaporated with toluene three times and dried highly under vacuum. The residue was dissolved with Et<sub>2</sub>O (0.5 mL) and CH<sub>2</sub>Cl<sub>2</sub> (0.5 mL) under Ar. To the mixture was added MS4A (100 mg) and then TMSOTf (19.1 μL, 106 μmol). The mixture was stirred at room temperature for 13 h. The reaction was quenched with Et<sub>3</sub>N (400 μL) and then the mixture was concentrated *in vacuo*. The residue was purified by column chromatography of SiO<sub>2</sub> with toluene-EtOAc (3:1) to give **17** (112 mg, 48%) as a colorless oil.

**<sup>1</sup>H-NMR (400 MHz, CDCl<sub>3</sub>)** δ: 6.00-5.74 (m, 9H), 5.38-5.10 (m, 22H), 4.67-4.58 (m, 12H), 4.54-4.50 (m, 4H), 4.45-4.40 (m, 2H), 4.27-4.23 (m, 1H), 4.20-4.15 (m, 1H), 4.14-4.12 (m, 2H), 3.96-3.90

(m, 1H), 3.73 (dd,  $J = 11.6, 3.7$  Hz, 1H), 3.67 (dd,  $J = 11.4, 2.0$  Hz, 1H), 3.48 (t,  $J = 9.5$  Hz, 1H), 3.36 (dd,  $J = 10.1, 2.2$  Hz, 1H), 0.88 (s, 9H), 0.03 (s, 3H), 0.01 (s, 3H).

$^{13}\text{C-NMR}$  (100 MHz,  $\text{CDCl}_3$ )  $\delta$ : 153.89, 153.85, 153.78, 153.73, 153.38, 134.11, 133.63, 132.20, 132.13, 132.02, 131.95, 131.46, 131.39, 131.21, 128.97, 128.17, 125.24, 118.99, 118.69, 118.48, 118.23, 117.49, 117.14, 98.36, 77.72, 76.41, 75.96, 75.69, 75.46, 74.01, 73.49, 73.30, 72.59, 71.46, 70.98, 69.58, 68.76, 68.73, 68.71, 68.69, 68.65, 68.56, 68.43, 61.72, 25.81, 18.25 (3C), -5.51, -5.56.

$^{31}\text{P-NMR}$  (160 MHz,  $\text{CDCl}_3$ )  $\delta$ : -1.50.

HRMS (ESI-TOF) calcd for  $\text{C}_{50}\text{H}_{73}\text{NaO}_{24}\text{PSi}$   $[\text{M}+\text{Na}]^+$  1139.3891, found 1139.3888.

### Synthesis of **19**

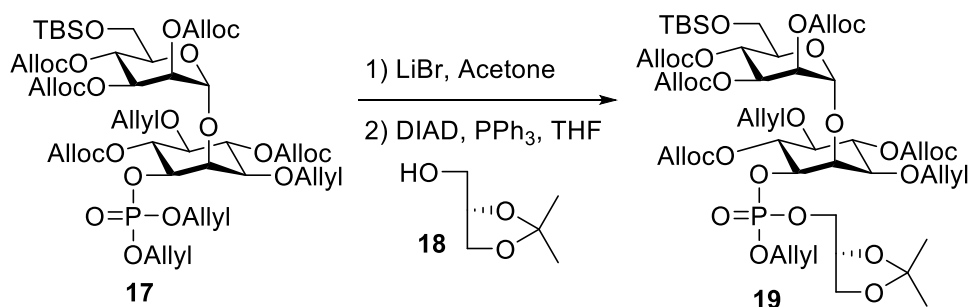

To the solution of **17** (127 mg, 114  $\mu\text{mol}$ ) in acetone (4 mL) was added LiBr (29.7 mg, 342  $\mu\text{mol}$ ) and refluxed for overnight. After the removal of solvent, the crude mixture was purified by column chromatography of  $\text{SiO}_2$  with toluene:EtOAc (5:1) to  $\text{CHCl}_3$ :MeOH (6:1) to give lithium salt. The desired product was diluted with EtOAc and washed with sat.  $\text{KHSO}_4$  aq. and brine. The organic layer was dried over  $\text{Na}_2\text{SO}_4$ , filtrated and concentrated *in vacuo* to obtain proton form. The resulting phosphoric acid, (S)-(+)-2,2-Dimethyl-1,3-dioxolane-4-methanol **18** (42.2  $\mu\text{L}$ , 342  $\mu\text{mol}$ ) and  $\text{PPh}_3$  (89.7 mg, 342  $\mu\text{mol}$ ) were dissolved with THF (1 mL) under Ar. To the mixture was added DIAD (62.5  $\mu\text{L}$ , 342  $\mu\text{mol}$ ) and stirred for overnight. The reaction mixture was concentrated *in vacuo*. The residue was purified by column chromatography of  $\text{SiO}_2$  with toluene-EtOAc (3:1) to give **19** (69.9 mg, 51%) as white solid.

$^1\text{H-NMR}$  (400 MHz,  $\text{CDCl}_3$ )  $\delta$ : 6.00-5.74 (m, 8H), 5.39-5.33 (m, 7H), 5.30-5.21 (m, 11H), 5.20-5.11 (m, 4H), 4.74-4.53 (m, 12H), 4.46-4.38 (m, 2H), 4.29-3.90 (m, 9H), 3.83-3.71 (m, 2H), 3.67 (dd,  $J = 11.6, 1.9$  Hz, 1H), 3.48 (td,  $J = 9.6, 2.9$  Hz, 1H), 3.37-3.35 (m, 1H), 1.41 (s, 3H), 1.34-1.33 (m, 3H), 0.88 (s, 9H), 0.02 (s, 3H), 0.01 (s, 3H).

**$^{13}\text{C}$ -NMR (100 MHz,  $\text{CDCl}_3$ )**  $\delta$ : 153.97, 153.92, 153.82, 153.76, 153.43, 134.10, 133.65, 132.16, 132.00, 131.50, 131.45, 131.41, 131.20, 119.06, 119.04, 118.74, 118.72, 118.66, 118.43, 117.42, 117.19, 109.84, 98.63, 77.66, 76.39, 75.94, 75.61, 75.48, 74.66, 73.86, 73.51, 73.37, 72.62, 71.40, 71.01, 69.55, 68.86, 68.81, 68.74, 68.71, 68.58, 68.01, 65.97, 65.73, 61.64, 26.70, 25.82 (3C), 25.20, 18.26, -5.52, -5.58.

**$^{31}\text{P}$ -NMR (160 MHz,  $\text{CDCl}_3$ )**  $\delta$ : -1.68.

**HRMS (ESI-TOF)** calcd for  $\text{C}_{53}\text{H}_{79}\text{Na}_2\text{O}_{26}\text{PSi}$   $[\text{M}+2\text{Na}]^{2+}$  618.2075, found 618.2076.

### Synthesis of **S6**

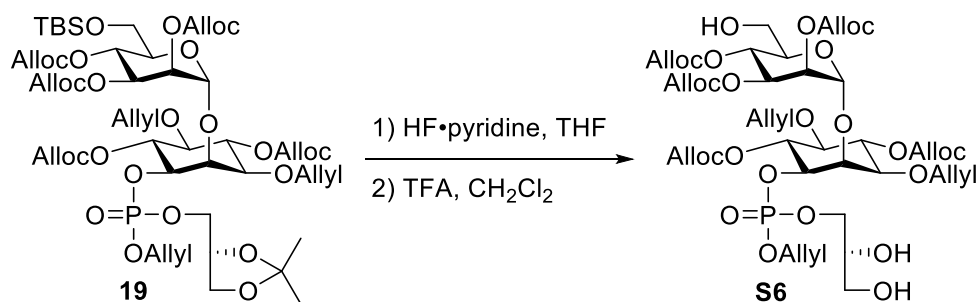

To the solution of **19** (69.9 mg, 58.7  $\mu\text{mol}$ ) in THF (6 mL) was added the mixture of pyridine (94.5  $\mu\text{L}$ , 1.17 mmol) and HF·pyridine (70% HF) (145  $\mu\text{L}$ ) and stirred for 2 d. After an addition of EtOAc, the mixture was quenched by addition of sat.  $\text{NaHCO}_3$  aq. and extracted with EtOAc. The organic layer was dried over  $\text{Na}_2\text{SO}_4$ , filtrated and concentrated *in vacuo*. The residue was purified by column chromatography of  $\text{SiO}_2$  with toluene-EtOAc (1:1) to give de-TBS compound (34.1 mg, 54%) as a colorless oil. The solution of de-TBS compound (34.1 mg, 31.7  $\mu\text{mol}$ ) in  $\text{CH}_2\text{Cl}_2$  (5 mL) was cooled to 0  $^\circ\text{C}$ . To the solution was added TFA (382  $\mu\text{L}$ ) at 0  $^\circ\text{C}$  and stirred for 4 h. The reaction was quenched by addition of sat.  $\text{NaHCO}_3$  aq. and extracted with AcOEt. The organic layer was washed with brine, dried over  $\text{Na}_2\text{SO}_4$ , filtrated and concentrated *in vacuo*. The residue was purified by column chromatography of  $\text{SiO}_2$  with  $\text{CHCl}_3$ -MeOH (30:1) to give **S6** (30.0 mg, 91%) as a colorless oil.

**$^1\text{H}$ -NMR (400 MHz,  $\text{CDCl}_3$ )**  $\delta$ : 6.00-5.74 (m, 8H), 5.38-5.11 (m, 22H), 4.70-4.41 (m, 14H), 4.24-3.86 (m, 8H), 3.71-3.58 (m, 4H), 3.50 (t,  $J = 9.6$  Hz, 1H), 3.39 (td,  $J = 10.2, 2.2$  Hz, 1H).

**$^{13}\text{C}$ -NMR (100 MHz,  $\text{CDCl}_3$ )**  $\delta$ : 154.11, 154.04, 154.00, 153.92, 153.40, 134.01, 133.53, 131.95, 131.42, 131.29, 131.24, 131.01, 130.94, 119.42, 119.36, 119.22, 119.10, 119.01, 118.77, 117.71,

117.25, 97.91, 77.20, 76.89, 75.47, 73.77, 72.65, 72.57, 71.76, 71.10, 70.37, 70.33, 69.65, 69.23, 69.16, 69.09 (2C), 68.99, 68.95 (2C), 68.89, 68.76, 62.76, 60.94.

**$^{31}\text{P}$ -NMR (160 MHz,  $\text{CDCl}_3$ )**  $\delta$ : -0.88.

**HRMS (ESI-TOF)** calcd for  $\text{C}_{44}\text{H}_{61}\text{Na}_2\text{O}_{26}\text{P}$   $[\text{M}+2\text{Na}]^{2+}$  541.1487, found 541.1493.

### Synthesis of **3**

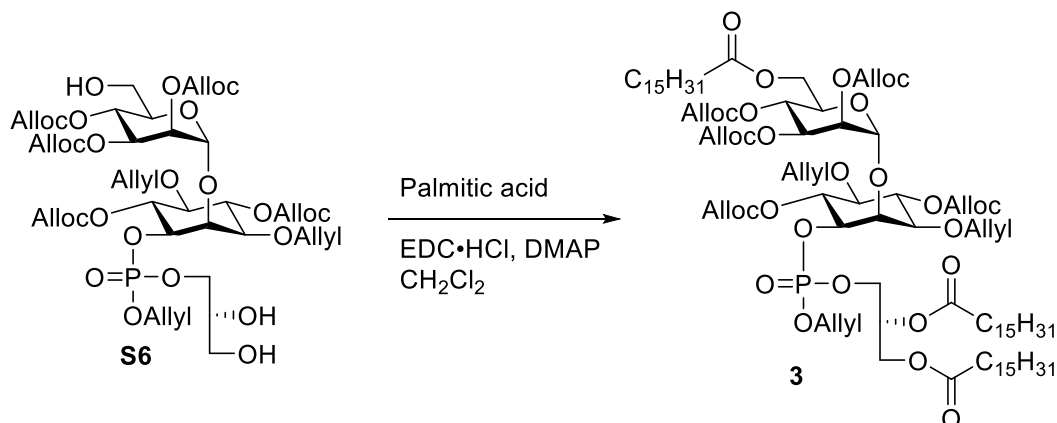

To a solution of **S6** (13.6 mg, 13.1  $\mu\text{mol}$ ), palmitic acid (16.8 mg, 65.7  $\mu\text{mol}$ ) and EDC·HCl (12.6 mg, 65.7  $\mu\text{mol}$ ) in  $\text{CH}_2\text{Cl}_2$  (1 mL) was added DMAP (8.02 mg, 65.7  $\mu\text{mol}$ ). The resulting mixture was stirred at room temperature for overnight. The reaction was quenched by an addition of sat.  $\text{KHSO}_4$  aq. and extracted with  $\text{CHCl}_3$ . Organic layer was washed with brine and dried over  $\text{Na}_2\text{SO}_4$ , filtered and concentrated *in vacuo*. The residue was purified by column chromatography of  $\text{SiO}_2$  with toluene-EtOAc (10:1) to give **3** (11.7 mg, 51%) as white solid.

**$^1\text{H}$ -NMR (400 MHz,  $\text{CDCl}_3$ )**  $\delta$ : 5.99-5.75 (m, 8H), 5.39-5.11 (m, 23H), 4.66-4.07 (m, 24H), 3.98 (dd,  $J = 12.9, 5.3$  Hz, 1H), 3.53-3.46 (m, 1H), 3.43-3.37 (m, 1H), 2.41-2.28 (m, 6H), 1.62-1.59 (m, 6H), 1.33-1.23 (m, 72H), 0.88 (t,  $J = 6.8$  Hz, 9H).

**$^{13}\text{C}$ -NMR (100 MHz,  $\text{CDCl}_3$ )**  $\delta$ : 173.55, 173.20, 172.86, 154.01, 153.89, 153.85, 153.33, 153.31, 134.13, 133.54, 132.11, 132.05, 131.45, 131.29, 131.22, 119.17, 119.13, 119.05, 118.86, 118.72, 118.61, 117.80, 117.26, 98.73, 77.62, 77.23, 76.36, 75.95, 75.57, 75.41, 73.66, 72.86, 72.50, 71.62, 69.37 (2C), 69.06, 68.99, 68.88, 68.80 (3C), 68.71 (2C), 65.94, 61.68, 34.18, 34.10, 34.01, 31.93 (3C), 29.72 (12C), 29.67 (6C), 29.54 (3C), 29.38 (3C), 29.33 (3C), 29.17 (3C), 24.85 (2C), 24.70, 22.70 (3C), 14.13 (3C).

**$^{31}\text{P}$ -NMR (160 MHz,  $\text{CDCl}_3$ )**  $\delta$ : -1.87.

**HRMS (ESI-TOF)** calcd for  $\text{C}_{92}\text{H}_{151}\text{Na}_2\text{O}_{29}\text{P}$   $[\text{M}+2\text{Na}]^{2+}$  898.4932, found 898.4940.

### Synthesis of Ac<sub>1</sub>PIM<sub>1</sub> 1

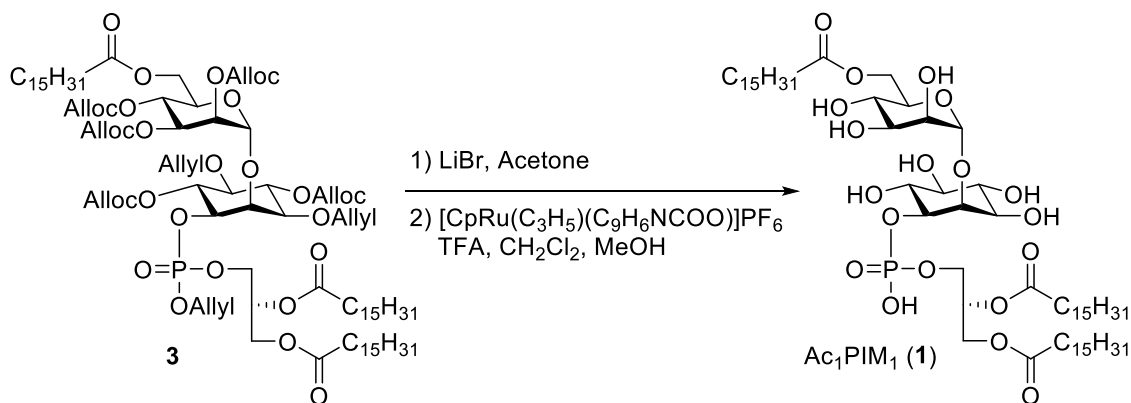

To a stirred solution of **3** (21.8 mg, 12.5  $\mu$ mol) in acetone (1 mL) was added LiBr (10.8 mg, 125  $\mu$ mol) and refluxed for 6 h. After the removal of solvent, the crude mixture was purified by column chromatography of SiO<sub>2</sub> (toluene:EtOAc = 1:1 to CHCl<sub>3</sub>:MeOH = 6:1) to give a lithium salt. The salt was dissolved in CH<sub>2</sub>Cl<sub>2</sub>:MeOH = 1:1 containing 1% TFA (vol/vol) (1 mL). [CpRu(C<sub>3</sub>H<sub>5</sub>)(C<sub>9</sub>H<sub>6</sub>NCOO)]PF<sub>6</sub> (6.53 mg, 12.5  $\mu$ mol) was added to the reaction mixture. After stirring for 1 h, the solvent was removed *in vacuo*. The crude mixture was purified by column chromatography of SiO<sub>2</sub> with CHCl<sub>3</sub>-MeOH (10:1 to 1:1) and metal scavenger SiliaMetS® DMT with CHCl<sub>3</sub>-MeOH (10:1 to 1:1) and SiO<sub>2</sub> with CHCl<sub>3</sub>-MeOH (10:1 to 1:1) to give **1** (2.15 mg, 14%) as a white solid. The purity of **1** was 99% (measured by quantitative NMR using CHBr<sub>3</sub> as an internal standard).

**<sup>1</sup>H-NMR (800 MHz, CDCl<sub>3</sub>:CD<sub>3</sub>OD:D<sub>2</sub>O = 65:35:8)**  $\delta$ : 5.25 (d,  $J$  = 4.7 Hz, 1H), 5.10-5.09 (m, 1H), 4.42 (dd,  $J$  = 12.1, 2.7 Hz, 1H), 4.34 (dd,  $J$  = 11.7, 1.6 Hz, 1H), 4.26-4.24 (m, 1H), 4.22-4.21 (m, 1H), 4.18 (dd,  $J$  = 12.1, 7.4 Hz, 1H), 4.15-4.13 (m, 1H), 4.06-4.02 (m, 1H), 4.02-4.00 (m, 1H), 3.99-3.94 (m, 2H), 3.74 (dd,  $J$  = 9.4, 3.9 Hz, 1H), 3.72 (t,  $J$  = 9.4 Hz, 1H), 3.65 (t,  $J$  = 9.8 Hz, 1H), 3.57 (t,  $J$  = 9.8 Hz, 1H), 3.47 (dd,  $J$  = 10.2, 2.3 Hz, 1H), 3.26 (t,  $J$  = 9.0 Hz, 1H), 2.36 (t,  $J$  = 7.8 Hz, 2H), 2.34 (t,  $J$  = 7.4 Hz, 2H), 2.30 (td,  $J$  = 7.8, 1.8 Hz, 2H), 1.63-1.56 (m, 6H), 1.33-1.22 (m, 72H), 0.88 (t,  $J$  = 7.0 Hz, 9H).

**<sup>13</sup>C-NMR (200 MHz, CDCl<sub>3</sub>:CD<sub>3</sub>OD:D<sub>2</sub>O = 65:35:8)**  $\delta$ : 175.15, 174.29, 173.97, 101.75, 78.99, 76.51, 74.55, 72.60, 72.29, 70.73, 70.59, 70.48, 70.44, 70.11, 67.09, 63.62, 63.54, 62.90, 34.18, 34.06, 33.86, 31.86 (3C), 29.67 (3C), 29.64 (6C), 29.58 (3C), 29.55 (3C), 29.52 (3C), 29.36 (3C), 29.28 (3C), 29.17 (3C), 29.10 (3C), 24.89, 24.80, 24.73, 22.58 (3C), 13.86 (3C).

**<sup>31</sup>P-NMR (160 MHz, CDCl<sub>3</sub>:CD<sub>3</sub>OD:D<sub>2</sub>O = 65:35:8)**  $\delta$ : -0.16.

**HRMS (ESI-TOF)** calcd for C<sub>63</sub>H<sub>118</sub>O<sub>19</sub>P [M-H]<sup>-</sup> 1209.8019, found 1209.8010.

### Synthesis of glycerolipid derivative 24a

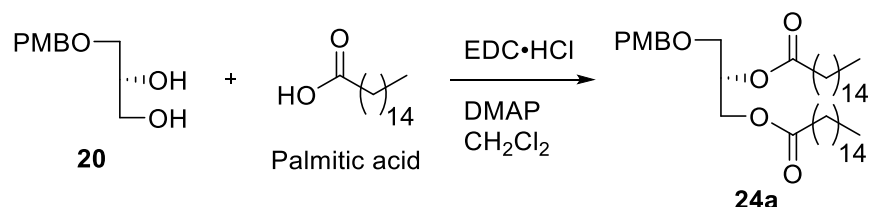

To a solution of (R)-3-(4-methoxybenzyloxy)propane-1,2-diol **20**<sup>8</sup> (108 mg, 500  $\mu$ mol), palmitic acid (385 mg, 1.50 mmol) and EDC·HCl (288 mg, 1.50 mmol) in CH<sub>2</sub>Cl<sub>2</sub> (3 mL) was added DMAP (18.3 mg, 150  $\mu$ mol). The resulting mixture was stirred at room temperature for overnight. The reaction was quenched by an addition of sat. KHSO<sub>4</sub> aq. and extracted with CHCl<sub>3</sub>. Organic layer was washed with brine and dried over Na<sub>2</sub>SO<sub>4</sub>, filtered and concentrated *in vacuo*. The residue was purified by column chromatography of SiO<sub>2</sub> with *n*-hexane-EtOAc (6:1) to give **24a** (345 mg, 95%) as white solid.

**<sup>1</sup>H-NMR (400 MHz, CDCl<sub>3</sub>)**  $\delta$ : 7.23 (d,  $J$  = 8.5 Hz, 2H), 6.87 (d,  $J$  = 8.5 Hz, 2H), 5.26-5.19 (m, 1H), 4.47 (dd,  $J$  = 19.1, 11.8 Hz, 2H), 4.33 (dd,  $J$  = 12.1, 3.8 Hz, 1H), 4.17 (dd,  $J$  = 12.0, 6.3 Hz, 1H), 3.81 (s, 3H), 3.55 (d,  $J$  = 5.1 Hz, 2H), 2.33-2.25 (m, 4H), 1.64-1.51 (m, 4H), 1.33-1.18 (m, 48H), 0.88 (t,  $J$  = 6.8 Hz, 6H).

**<sup>13</sup>C-NMR (100 MHz, CDCl<sub>3</sub>)**  $\delta$ : 173.25, 172.97, 159.23, 129.64, 129.19 (2C), 113.68 (2C), 72.84, 69.92, 67.77, 62.59, 55.07, 34.22, 34.01, 31.87 (2C), 29.64 (3C), 29.61 (3C), 29.58 (2C), 29.53, 29.43 (2C), 29.40, 29.31 (2C), 29.23 (2C), 29.20, 29.05 (2C), 29.01, 24.88, 24.81, 22.62 (2C), 14.04 (2C).

**HRMS (ESI-TOF)** calcd for C<sub>43</sub>H<sub>76</sub>NaO<sub>6</sub> [M+Na]<sup>+</sup> 711.5534, found 711.5538.

### Synthesis of glycerolipid derivative 22b

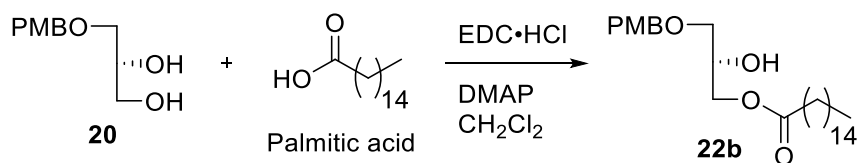

To a solution of (R)-3-(4-methoxybenzyloxy)propane-1,2-diol **20**<sup>8</sup> (425 mg, 2.00 mmol), palmitic acid (513 mg, 2.00 mmol) and EDC·HCl (383 mg, 2.00 mmol) in CH<sub>2</sub>Cl<sub>2</sub> (10 mL) was added DMAP (24.4 mg, 200  $\mu$ mol). The resulting mixture was stirred at room temperature for overnight. The reaction was quenched by an addition of sat. KHSO<sub>4</sub> aq. and extracted with CHCl<sub>3</sub>. Organic layer was washed with

brine and dried over Na<sub>2</sub>SO<sub>4</sub>, filtered and concentrated *in vacuo*. The residue was purified by column chromatography of SiO<sub>2</sub> with *n*-hexane-EtOAc (2:1 to EtOAc only) to give **22b** (83.0 mg, 35%) as white solid.

**<sup>1</sup>H-NMR (400 MHz, CDCl<sub>3</sub>)**  $\delta$ : 7.25 (d, *J* = 8.8 Hz, 2H), 6.88 (d, *J* = 8.8 Hz, 2H), 5.29 (s, 1H), 4.48 (s, 2H), 4.20-4.09 (m, 2H), 4.05-3.98 (m, 1H), 3.80 (s, 3H), 3.52 (dd, *J* = 9.3, 4.4 Hz, 1H), 3.45 (dd, *J* = 9.5, 6.1 Hz, 1H), 2.56 (d, *J* = 4.4 Hz, 1H), 2.32 (t, *J* = 7.6 Hz, 2H), 1.65-1.57 (m, 2H), 1.25-1.25 (m, 22H), 0.88 (t, *J* = 6.6 Hz, 3H).

**<sup>13</sup>C-NMR (100 MHz, CDCl<sub>3</sub>)**  $\delta$ : 173.91, 159.33, 129.71, 129.38 (2C), 113.82 (2C), 73.12, 70.52, 68.87, 65.32, 55.22, 34.11, 31.89, 29.65 (2C), 29.63, 29.61 (2C), 29.57, 29.43, 29.32, 29.22, 29.09, 24.87, 22.65, 14.08.

**HRMS (ESI-TOF)** calcd for C<sub>27</sub>H<sub>46</sub>NaO<sub>5</sub> [M+Na]<sup>+</sup> 473.3237, found 473.3241.

#### Synthesis of glycerolipid derivative **22c**

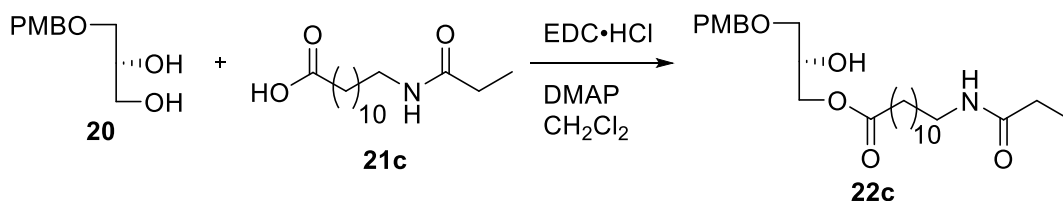

The title compound was synthesized following the procedure for **22b**. (R)-3-(4-methoxybenzyloxy)propane-1,2-diol **20**<sup>8</sup> (106 mg, 500  $\mu$ mol) and compound **21c**<sup>3</sup> (136 mg, 500  $\mu$ mol) were used as starting materials. Compound **22c** (97.8 mg, 33%) was obtained as a white solid.

**<sup>1</sup>H-NMR (400 MHz, CDCl<sub>3</sub>)**  $\delta$ : 7.25 (d, *J* = 8.8 Hz, 2H), 6.89 (dd, *J* = 6.6, 2.2 Hz, 2H), 4.49 (s, 2H), 4.20-4.09 (m, 2H), 4.02 (td, *J* = 9.6, 5.0 Hz, 1H), 3.81 (s, 3H), 3.53 (dd, *J* = 9.5, 4.1 Hz, 1H), 3.46 (dd, *J* = 9.5, 6.1 Hz, 1H), 3.24 (q, *J* = 6.8 Hz, 2H), 2.52 (d, *J* = 4.4 Hz, 1H), 2.39-2.25 (m, 2H), 2.19 (q, *J* = 7.6 Hz, 2H), 1.51-1.44 (m, 2H), 1.34-1.22 (m, 16H), 1.15 (t, *J* = 7.6 Hz, 3H).

**<sup>13</sup>C-NMR (100 MHz, CDCl<sub>3</sub>)**  $\delta$ : 173.77, 159.11, 129.64, 129.21 (2C), 129.11, 113.62 (2C), 72.92, 70.47, 68.55, 65.26, 55.06, 39.33, 33.94, 29.50, 29.42, 29.27, 29.26, 29.18, 29.08, 29.01, 28.88, 26.72, 24.68, 9.83.

**HRMS (ESI-TOF)** calcd for C<sub>26</sub>H<sub>43</sub>NNaO<sub>6</sub> [M+Na]<sup>+</sup> 488.2983, found 488.2992.

#### Synthesis of glycerolipid derivative **24b**

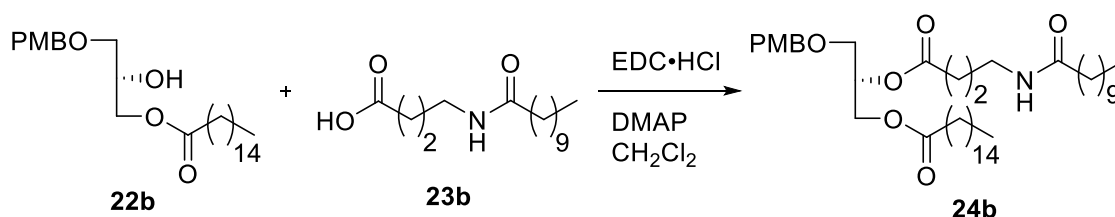

To a solution of **22b** (83.0 mg, 184  $\mu\text{mol}$ ), **23b**<sup>3</sup> (100 mg, 368  $\mu\text{mol}$ ) and EDC·HCl (70.6 mg, 368  $\mu\text{mol}$ ) in  $\text{CH}_2\text{Cl}_2$  (3 mL) was added DMAP (4.50 mg, 36.8  $\mu\text{mol}$ ). The resulting mixture was stirred at room temperature for overnight. The reaction was quenched by an addition of sat.  $\text{KHSO}_4$  aq. and extracted with  $\text{CHCl}_3$ . Organic layer was washed with brine and dried over  $\text{Na}_2\text{SO}_4$ , filtered and concentrated *in vacuo*. The residue was purified by column chromatography of  $\text{SiO}_2$  with *n*-hexane-EtOAc (2:1) to give **24b** (112 mg, 87%) as white solid.

**<sup>1</sup>H-NMR (400 MHz,  $\text{CDCl}_3$ )**  $\delta$ : 7.23 (d,  $J$  = 8.4 Hz, 2H), 6.87 (d,  $J$  = 8.5 Hz, 2H), 5.92-5.82 (m, 1H), 5.21 (dt,  $J$  = 10.3, 4.6 Hz, 1H), 4.46 (dd,  $J$  = 15.7, 11.6 Hz, 2H), 4.38 (dd,  $J$  = 12.0, 3.7 Hz, 1H), 4.15 (dd,  $J$  = 11.9, 5.9 Hz, 1H), 3.80 (s, 3H), 3.56 (d,  $J$  = 5.3 Hz, 2H), 3.35-3.19 (m, 2H), 2.36 (t,  $J$  = 7.1 Hz, 2H), 2.28 (t,  $J$  = 7.6 Hz, 2H), 2.12 (t,  $J$  = 7.6 Hz, 2H), 1.86-1.79 (m, 2H), 1.65-1.52 (m, 4H), 1.35-1.19 (m, 38H), 0.88 (t,  $J$  = 6.7 Hz, 6H).

**<sup>13</sup>C-NMR (100 MHz,  $\text{CDCl}_3$ )**  $\delta$ : 173.43, 173.24, 172.57, 159.29, 129.51, 129.28 (2C), 113.76 (2C), 72.93, 70.41, 67.73, 62.36, 55.17, 38.50, 36.68, 34.02, 31.85, 31.82, 31.52, 29.62 (2C), 29.58 (2C), 29.55, 29.51, 29.44, 29.42, 29.31, 29.28 (3C), 29.25, 29.21, 29.05, 25.68, 24.81, 24.51, 22.62, 14.04.

**HRMS (ESI-TOF)** calcd for  $\text{C}_{42}\text{H}_{73}\text{NNaO}_7$   $[\text{M}+\text{Na}]^+$  726.5279, found 726.5287.

#### Synthesis of glycerolipid derivative **24c**

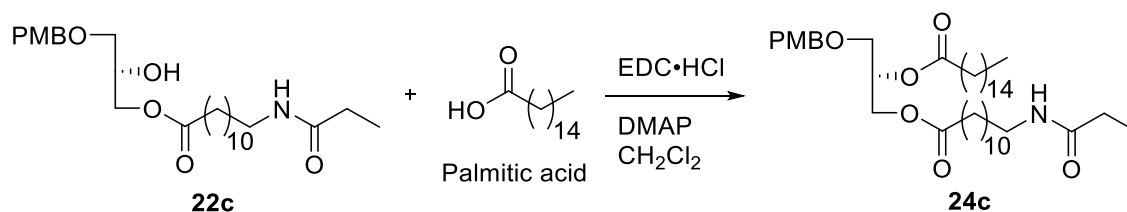

The title compound was synthesized following the procedure for **24b**. **22c** (177 mg, 380  $\mu\text{mol}$ ) and palmitic acid (292 mg, 1.14 mmol) were used as starting materials. Compound **24c** (230 mg, 86%) was obtained as a white solid.

**<sup>1</sup>H-NMR (400 MHz,  $\text{CDCl}_3$ )**  $\delta$ : 7.23 (d,  $J$  = 8.5 Hz, 2H), 6.87 (d,  $J$  = 8.6 Hz, 2H), 5.41 (s, 1H), 5.26-5.19 (m, 1H), 4.47 (dd,  $J$  = 18.6, 11.7 Hz, 2H), 4.32 (dd,  $J$  = 11.8, 3.8 Hz, 1H), 4.17 (dd,  $J$  = 11.8, 6.5



Hz, 1H), 3.81 (s, 3H), 3.55 (dd,  $J = 5.2, 1.0$  Hz, 2H), 3.24 (dd,  $J = 13.1, 7.0$  Hz, 2H), 2.37-2.24 (m, 4H), 2.19 (q,  $J = 7.6$  Hz, 2H), 1.64-1.56 (m, 4H), 1.51-1.45 (m, 2H), 1.33-1.20 (m, 38H), 1.16 (t,  $J = 7.6$  Hz, 3H), 0.88 (t,  $J = 6.8$  Hz, 3H).

**$^{13}\text{C}$ -NMR (100 MHz,  $\text{CDCl}_3$ )**  $\delta$ : 173.64, 173.42, 173.14, 159.28, 129.73, 129.28 (2C), 113.79 (2C), 72.94, 69.99, 67.88, 62.69, 55.25, 39.51, 34.32, 34.08, 31.91, 29.80, 29.68 (2C), 29.65 (3C), 29.63, 29.47 (3C), 29.40, 29.35 (2C), 29.28, 29.27, 29.23, 29.07 (2C), 26.89, 24.94, 24.84, 22.67, 14.12, 9.94.

**HRMS (ESI-TOF)** calcd for  $\text{C}_{42}\text{H}_{73}\text{NNaO}_7$   $[\text{M}+\text{Na}]^+$  726.5279, found 726.5287.

#### Synthesis of glycerolipid derivative **25a**

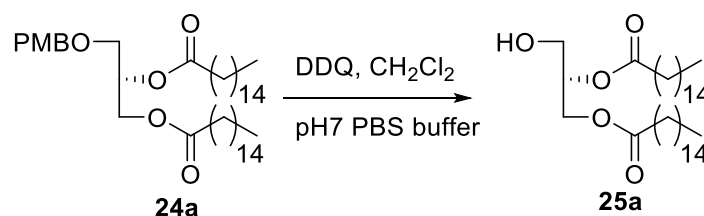

To a solution of **24a** (46.7 mg, 67.8  $\mu\text{mol}$ ) in  $\text{CH}_2\text{Cl}_2$  (2 mL) and pH 7 phosphate buffer (220  $\mu\text{L}$ ) was added DDQ (30.8 mg, 136  $\mu\text{mol}$ ). The resulting mixture was stirred at room temperature for overnight. The reaction was quenched by an addition of sat.  $\text{NaHCO}_3$  aq. and extracted with  $\text{CHCl}_3$ . Organic layer was washed with brine and dried over  $\text{Na}_2\text{SO}_4$ , filtered and concentrated *in vacuo*. The residue was purified by column chromatography of  $\text{SiO}_2$  with toluene-EtOAc (6:1) to give **25a** (29.4 mg, 76%) as white solid.

**$^1\text{H}$ -NMR (400 MHz,  $\text{CDCl}_3$ )**  $\delta$ : 5.04-4.99 (m, 1H), 4.25 (dd,  $J = 12.0, 4.4$  Hz, 1H), 4.16 (dd,  $J = 12.0, 5.7$  Hz, 1H), 3.66 (d,  $J = 5.2$  Hz, 2H), 2.26 (q,  $J = 7.9$  Hz, 4H), 1.60-1.51 (m, 4H), 1.27-1.14 (m, 48H), 0.81 (t,  $J = 6.7$  Hz, 6H).

**$^{13}\text{C}$ -NMR (100 MHz,  $\text{CDCl}_3$ )**  $\delta$ : 173.80, 173.44, 72.08, 61.99, 61.51, 34.27, 34.09, 31.91 (2C), 29.68 (4C), 29.67 (2C), 29.64 (4C), 29.61 (2C), 29.46 (2C), 29.34 (2C), 29.26 (2C), 29.10, 29.07, 24.93, 24.87, 22.67 (2C), 14.10 (2C).

**HRMS (ESI-TOF)** calcd for  $\text{C}_{35}\text{H}_{68}\text{NaO}_5$   $[\text{M}+\text{Na}]^+$  591.4959, found 591.4963.

#### Synthesis of glycerolipid derivative **25b**

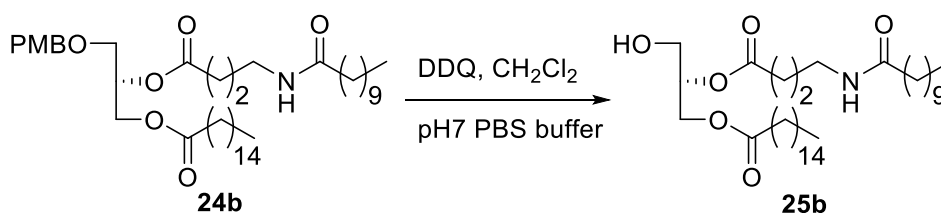

The title compound was synthesized following the procedure for **25a**. **24b** (30.0 mg, 42.6  $\mu\text{mol}$ ) and DDQ (19.3 mg, 85.2  $\mu\text{mol}$ ) were used as starting materials. Compound **25b** (23.3 mg, 94%) was obtained as a white solid.

**$^1\text{H-NMR}$  (400 MHz,  $\text{CDCl}_3$ )**  $\delta$ : 5.72-5.68 (m, 1H), 5.10-5.05 (m, 1H), 4.32-4.05 (m, 2H), 3.84-3.80 (m, 1H), 3.69 (dd,  $J = 12.5, 5.4$  Hz, 1H), 3.51-3.09 (m, 2H), 2.39-2.26 (m, 4H), 2.16-2.11 (m, 2H), 1.91-1.69 (m, 2H), 1.61-1.54 (m, 4H), 1.31-1.18 (m, 38H), 0.85 (t,  $J = 6.8$  Hz, 6H).

**$^{13}\text{C-NMR}$  (100 MHz,  $\text{CDCl}_3$ )**  $\delta$ : 173.84, 173.66, 172.50, 72.94, 62.16, 61.22, 38.04, 36.75, 34.10, 31.91, 31.87, 31.07, 29.68 (3C), 29.64 (3C), 29.60, 29.55, 29.48, 29.46, 29.34, 29.31, 29.28, 29.27, 29.10, 25.68, 25.09, 24.87, 22.67, 22.66, 14.11 (2C).

**HRMS (ESI-TOF)** calcd for  $\text{C}_{34}\text{H}_{65}\text{NNaO}_6$   $[\text{M}+\text{Na}]^+$  606.4704, found 606.4708.

#### Synthesis of glycerolipid derivative **25c**

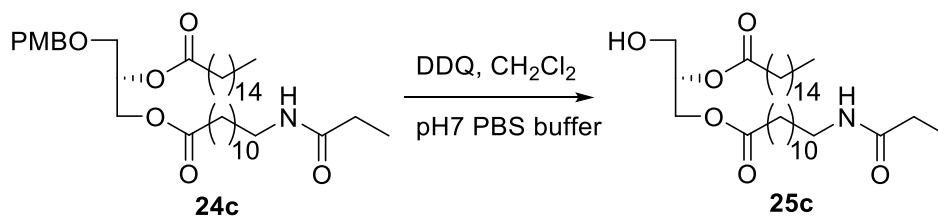

The title compound was synthesized following the procedure for **25a**. **24c** (193 mg, 274  $\mu\text{mol}$ ) and DDQ (125 mg, 549  $\mu\text{mol}$ ) were used as starting materials. Compound **25c** (145 mg, 90%) was obtained as a white solid.

**$^1\text{H-NMR}$  (400 MHz,  $\text{CDCl}_3$ )**  $\delta$ : 5.47-5.35 (m, 1H), 5.11-5.06 (m, 1H), 4.32 (dd,  $J = 12.0, 4.6$  Hz, 1H), 4.24 (dd,  $J = 12.0, 5.6$  Hz, 1H), 3.76-3.70 (m, 2H), 3.24 (td,  $J = 6.8, 6.1$  Hz, 2H), 2.34 (q,  $J = 7.9$  Hz, 4H), 2.19 (q,  $J = 7.6$  Hz, 2H), 1.66-1.58 (m, 4H), 1.52-1.46 (m, 2H), 1.33-1.21 (m, 38H), 1.16 (t,  $J = 7.6$  Hz, 3H), 0.88 (t,  $J = 6.8$  Hz, 3H).

**$^{13}\text{C-NMR}$  (100 MHz,  $\text{CDCl}_3$ )**  $\delta$ : 173.77, 173.65, 173.41, 72.07, 62.00, 61.49, 39.49, 34.27, 34.07, 31.91, 29.80, 29.68 (3C), 29.64 (3C), 29.60, 29.46, 29.42, 29.39, 29.34, 29.31, 29.26, 29.21, 29.14, 29.07, 29.02, 26.84, 24.93, 24.83, 22.67, 14.11, 9.93.

**HRMS (ESI-TOF)** calcd for  $C_{34}H_{65}NNaO_6$   $[M+Na]^+$  606.4704, found 606.4713.

#### Synthesis of inositol phosphate derivative **26**

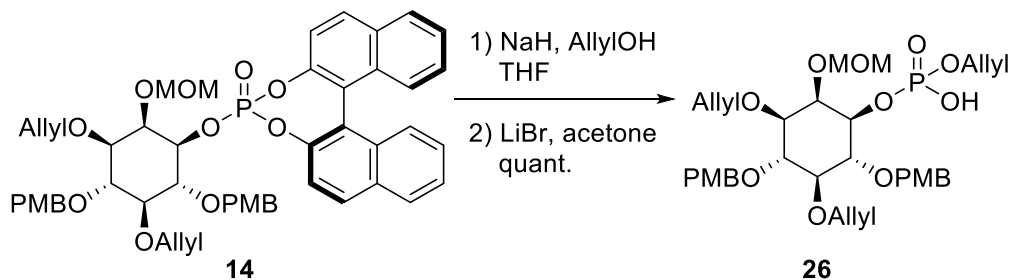

To a suspension of NaH (60% oil dispersion) (27.6 mg, 689  $\mu$ mol) in THF (7 mL) at 0 °C was added allyl alcohol (52.6  $\mu$ L, 773  $\mu$ mol). After stirring for 30 min, the reaction was added to the solution of **14**<sup>7</sup> (241 mg, 276  $\mu$ mol) in THF (3 mL) at 0 °C. The reaction mixture was warmed up to room temperature, and stirred for 1.5 h. The reaction was cooled to 0 °C, and then quenched with 10% aqueous citric acid. The mixture was extracted with ethyl acetate. The organic solution was washed with sat.  $NaHCO_3$  aq. and brine, dried over  $Na_2SO_4$ , filtered and concentrated *in vacuo*. The residue was purified by column chromatography of  $SiO_2$  with *n*-hexane-EtOAc (5:1). The resulting product was dissolved with acetone (3 mL). To the solution was added LiBr (120 mg, 1.38 mmol) and refluxed for 6 h. After the removal of solvent, the crude mixture was purified by column chromatography of  $SiO_2$  with toluene-EtOAc (5:1), then  $CH_2Cl_2$ -MeOH (6:1) to give lithium salt. The desire product was diluted with EtOAc and washed with sat.  $KHSO_4$  aq. and brine. The organic layer was dried over  $Na_2SO_4$ , filtrated and concentrated *in vacuo* to obtain proton form **26** (138 mg, 75%) as a colorless oil.

**$^1H$ -NMR (400 MHz,  $CDCl_3$ )**  $\delta$ : 9.82 (s, 1H), 7.33-7.27 (m, 4H), 6.87-6.82 (m, 4H), 6.01-5.78 (m, 3H), 5.34-5.30 (m, 1H), 5.29-5.22 (m, 2H), 5.19-5.14 (m, 3H), 4.83-4.66 (m, 6H), 4.48-4.45 (m, 2H), 4.34-4.28 (m, 3H), 4.19-4.15 (m, 1H), 4.11-4.04 (m, 2H), 3.89 (t,  $J$  = 9.6 Hz, 1H), 3.83 (t,  $J$  = 9.5 Hz, 1H), 3.79 (s, 3H), 3.76 (s, 3H), 3.44 (s, 3H), 3.27-3.20 (m, 2H).

**$^{13}C$ -NMR (100 MHz,  $CDCl_3$ )**  $\delta$ : 159.12, 159.08, 135.16, 134.52, 132.37, 132.30, 130.87, 130.49, 129.83, 129.75, 117.86, 116.74, 116.27, 113.65, 113.56, 97.47, 82.50, 80.82, 79.68, 79.61, 79.17, 77.88, 77.82, 75.49, 75.39, 74.49, 73.80, 71.31, 68.00, 67.94, 55.71, 55.19, 55.14.

**$^{31}P$ -NMR (160 MHz,  $CDCl_3$ )**  $\delta$ : 0.69.

**HRMS (ESI-TOF)** calcd for  $C_{33}H_{44}NaO_{12}P$   $[M+Na]^+$  663.2576, found 663.2584.

### Synthesis of inositol phospholipid derivative 4a

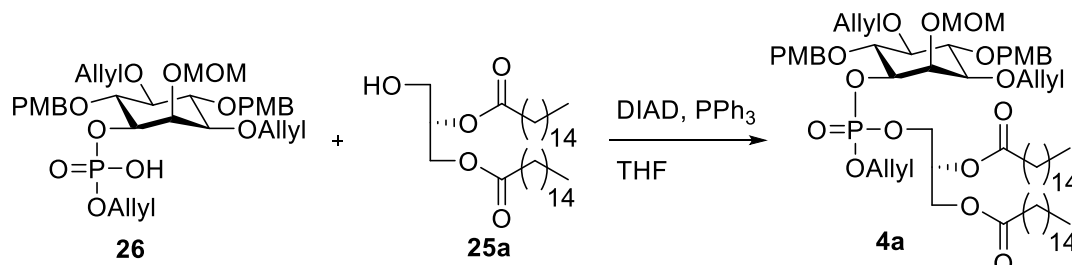

To the solution of **26** (50.1 mg, 75.4  $\mu$ mol), **25a** (85.9 mg, 151  $\mu$ mol) and  $\text{PPh}_3$  (39.6 mg, 151  $\mu$ mol) in THF (750  $\mu$ L) was added DIAD (27.6  $\mu$ L, 151  $\mu$ mol) and stirred for overnight. The reaction mixture was concentrated *in vacuo*. The residue was purified by column chromatography of  $\text{SiO}_2$  with *n*-hexane-EtOAc (1:3) to give **4a** (60.5 mg, 66%) as white solid.

**$^1\text{H}$ -NMR (400 MHz,  $\text{CDCl}_3$ )**  $\delta$ : 7.32-7.26 (m, 4H), 6.87-6.83 (m, 4H), 6.00-5.77 (m, 3H), 5.35-5.14 (m, 6H), 5.10-4.94 (m, 1H), 4.81-4.76 (m, 4H), 4.68 (dd,  $J = 10.3, 3.4$  Hz, 2H), 4.55-4.41 (m, 2H), 4.37 (dd,  $J = 13.0, 4.9$  Hz, 1H), 4.31-3.92 (m, 9H), 3.88 (t,  $J = 8.5$  Hz, 1H), 3.83 (t,  $J = 8.5$  Hz, 1H), 3.80 (s, 3H), 3.79 (s, 3H), 3.45-3.39 (m, 3H), 3.30-3.23 (m, 2H), 2.32-2.23 (m, 4H), 1.62-1.52 (m, 4H), 1.33-1.19 (m, 48H), 0.88 (t,  $J = 6.7$  Hz, 6H).

**$^{13}\text{C}$ -NMR (100 MHz,  $\text{CDCl}_3$ )**  $\delta$ : 173.08, 172.74, 159.17, 159.06, 135.11, 134.56, 132.28, 132.22, 130.85, 130.59, 129.81, 129.45, 129.32, 118.28, 118.16, 116.77, 116.39, 113.71, 113.60, 113.56, 97.46, 82.68, 80.91, 79.28, 77.96, 75.56, 75.15, 74.50, 73.67, 71.38, 69.23, 68.41, 65.56, 65.23, 61.61, 55.78, 55.22, 55.19, 34.06, 33.92, 31.89 (2C), 29.67 (6C), 29.63 (6C), 29.47 (2C), 29.33 (2C), 29.27 (2C), 29.09, 29.06, 24.78 (2C), 22.66 (2C), 14.09 (2C).

**$^{31}\text{P}$ -NMR (160 MHz,  $\text{CDCl}_3$ )**  $\delta$ : -0.59.

**HRMS (ESI-TOF)** calcd for  $\text{C}_{68}\text{H}_{111}\text{NaO}_{16}\text{P}$   $[\text{M}+\text{Na}]^+$  1273.7502, found 1273.7496.

### Synthesis of inositol phospholipid derivative 4b

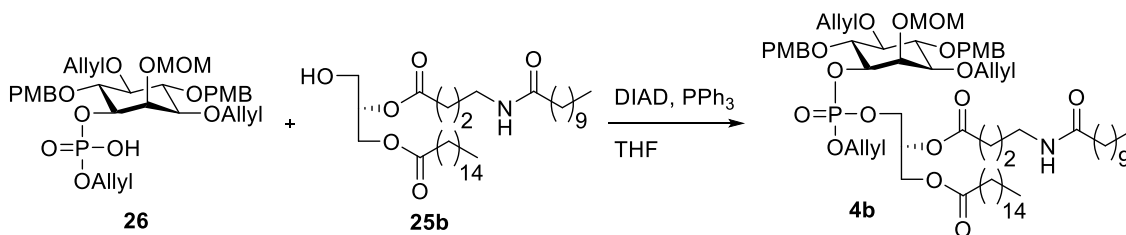

The title compound was synthesized following the procedure for **4a**. compounds **26** (65.0 mg, 97.8  $\mu\text{mol}$ ) and **25b** (114 mg, 196  $\mu\text{mol}$ ) were used as starting materials. Compound **4b** (70.6 mg, 59%) was obtained as a white solid.

**$^1\text{H-NMR}$  (400 MHz,  $\text{CDCl}_3$ )  $\delta$ :** 7.30-7.27 (m, 4H), 6.88-6.84 (m, 4H), 6.27-6.04 (m, 1H), 5.93-5.84 (m, 3H), 5.34-5.05 (m, 7H), 4.82-4.76 (m, 4H), 4.70-4.64 (m, 2H), 4.53-4.46 (m, 2H), 4.39-4.00 (m, 10H), 3.98-3.77 (m, 8H), 3.43 (s, 3H), 3.40-3.13 (m, 4H), 2.41-2.24 (m, 4H), 2.18-2.10 (m, 2H), 1.86-1.76 (m, 2H), 1.64-1.56 (m, 4H), 1.33-1.21 (m, 38H), 0.88 (t,  $J = 6.5$  Hz, 6H).

**$^{13}\text{C-NMR}$  (100 MHz,  $\text{CDCl}_3$ )  $\delta$ :** 173.31, 173.27, 172.24, 159.19, 159.12, 135.06, 134.51, 130.81, 130.57, 130.53, 129.82, 129.79, 129.47, 129.34, 118.42, 118.26, 116.86, 116.80, 116.41, 113.72, 113.61, 97.42, 82.74, 80.90, 79.26, 78.04, 75.58, 74.50, 73.65, 71.39, 68.39, 67.70, 65.62, 64.81, 61.43, 61.43, 55.74, 55.23, 55.20, 38.22, 36.69, 33.94, 31.88, 31.84, 31.06, 29.65 (2C), 29.61, 29.58, 29.55, 29.53, 29.49, 29.45, 29.42, 29.36, 29.31, 29.28, 29.25, 29.10, 29.08, 25.74, 24.78, 24.21, 22.65, 22.63, 14.08 (2C).

**$^{31}\text{P-NMR}$  (160 MHz,  $\text{CDCl}_3$ )  $\delta$ :** -0.64.

**HRMS (ESI-TOF)** calcd for  $\text{C}_{67}\text{H}_{108}\text{NNaO}_{17}\text{P}$   $[\text{M}+\text{Na}]^+$  1252.7247, found 1252.7253.

#### Synthesis of inositol phospholipid derivative **4c**

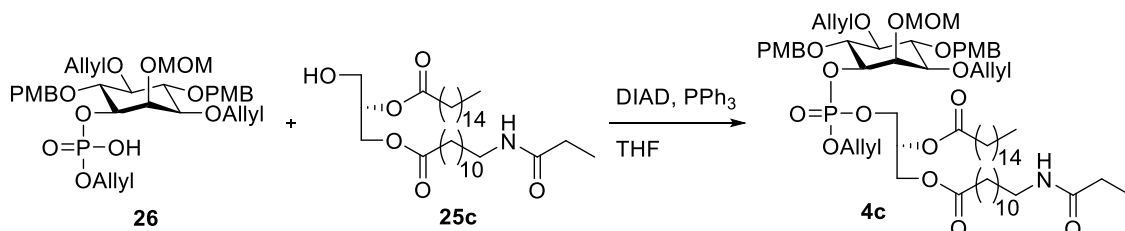

The title compound was synthesized following the procedure for **4a**. Compounds **26** (65.0 mg, 97.8  $\mu\text{mol}$ ) and **25c** (114 mg, 196  $\mu\text{mol}$ ) were used as starting materials. Compound **4c** (115 mg, 95%) was obtained as a white solid.

**$^1\text{H-NMR}$  (400 MHz,  $\text{CDCl}_3$ )  $\delta$ :** 7.31-7.28 (m, 4H), 6.87-6.83 (m, 4H), 6.00-5.77 (m, 3H), 5.35-5.24 (m, 3H), 5.22-5.14 (m, 3H), 5.12-5.07 (m, 1H), 4.80-4.77 (m, 4H), 4.68 (dd,  $J = 10.3, 4.4$  Hz, 2H), 4.52-4.42 (m, 2H), 4.39-4.01 (m, 10H), 3.97-3.71 (m, 8H), 3.45-3.40 (m, 3H), 3.29-3.20 (m, 5H), 2.36-2.12 (m, 6H), 1.63-1.56 (m, 4H), 1.50-1.46 (m, 2H), 1.30-1.23 (m, 38H), 1.15 (t,  $J = 7.6$  Hz, 3H), 0.88 (t,  $J = 6.7$  Hz, 3H).

**$^{13}\text{C-NMR}$  (100 MHz,  $\text{CDCl}_3$ )  $\delta$ :** 173.63, 173.28, 172.67, 159.11, 159.02, 135.05, 134.49, 132.21,

132.13, 130.80, 130.52, 129.72, 129.38, 129.26, 118.21, 116.72, 116.29, 113.64 (2C), 113.53, 113.50, 97.37, 82.63, 80.85, 79.22, 75.47, 75.08, 74.42, 73.61, 71.98, 71.33, 69.27, 68.22, 62.09, 61.47, 61.17, 55.70, 55.15, 55.10, 39.41, 34.19, 33.98, 31.81, 29.64, 29.58 (3C), 29.54 (3C), 29.40 (2C), 29.31, 29.25 (2C), 29.19 (2C), 29.13, 29.06, 28.98, 28.93, 26.81, 24.74, 24.69, 22.57, 14.02, 9.87.

**$^{31}\text{P}$ -NMR (160 MHz,  $\text{CDCl}_3$ )  $\delta$ : -0.67.**

**HRMS (ESI-TOF)** calcd for  $\text{C}_{67}\text{H}_{108}\text{NNaO}_{17}\text{P}$   $[\text{M}+\text{Na}]^+$  1252.7247, found 1252.7255.

### Synthesis of inositol phospholipid derivative **S7a**

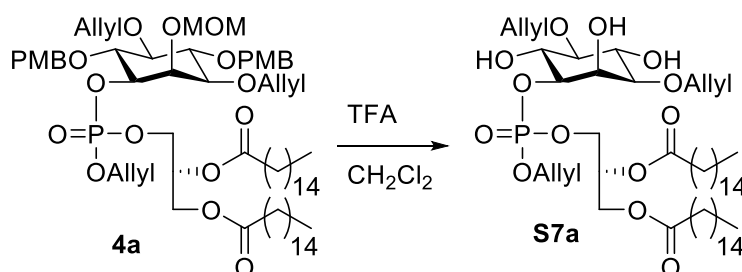

The solution of **4a** (60.5 mg, 49.8  $\mu\text{mol}$ ) in  $\text{CH}_2\text{Cl}_2$  (1 mL) was cooled to 0  $^\circ\text{C}$ . To the solution was added trifluoroacetic acid (1 mL) and stirred for 1h. The solvent removed under reduced pressure and added toluene then concentrated *in vacuo*. The residue was purified by column chromatography of  $\text{SiO}_2$  with  $\text{CHCl}_3$ -MeOH (9:1) to give **S7a** (55.5 mg, quant.) as a colorless oil.

**$^1\text{H}$ -NMR (400 MHz,  $\text{CDCl}_3$ )  $\delta$ :** 6.02-5.89 (m, 3H), 5.40-5.16 (m, 7H), 4.65-4.57 (m, 2H), 4.39-4.12 (m, 10H), 4.07-4.01 (m, 1H), 3.93 (td,  $J$  = 9.5, 4.6 Hz, 1H), 3.29-3.25 (m, 1H), 3.19 (td,  $J$  = 9.3, 4.2 Hz, 1H), 2.35-2.28 (m, 4H), 1.62-1.57 (m, 4H), 1.29-1.23 (m, 48H), 0.88 (t,  $J$  = 6.8 Hz, 6H).

**$^{13}\text{C}$ -NMR (100 MHz,  $\text{CDCl}_3$ )  $\delta$ :** 173.50, 173.25, 134.95, 134.05 (2C), 118.83, 118.27, 117.30, 81.51, 81.47, 78.27, 78.23, 73.92, 73.90, 71.60, 71.58, 71.48, 71.36, 61.83, 61.78, 34.12, 33.99, 31.90 (2C), 29.68 (6C), 29.66 (2C), 29.64 (4C), 29.48 (2C), 29.34 (2C), 29.28 (2C), 29.11, 29.07, 24.79 (2C), 22.67 (2C), 14.09 (2C).

**$^{31}\text{P}$ -NMR (160 MHz,  $\text{CDCl}_3$ )  $\delta$ : -1.44.**

**HRMS (ESI-TOF)** calcd for  $\text{C}_{50}\text{H}_{91}\text{NaO}_{13}\text{P}$   $[\text{M}+\text{Na}]^+$  953.6090, found 953.6082.

### Synthesis of inositol phospholipid derivative **S7b**

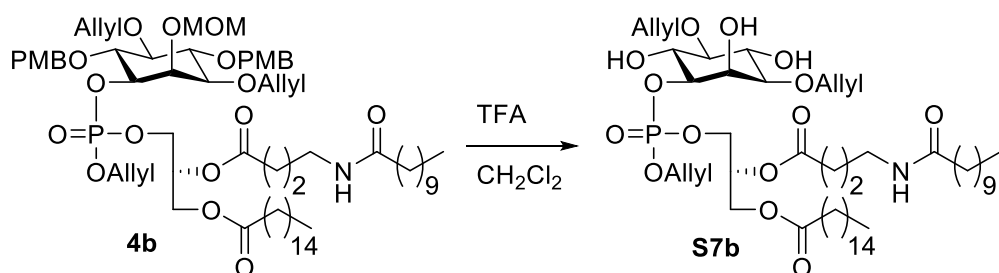

The title compound was synthesized following the procedure for **S7a**. Compound **4b** (70.6 mg, 57.4  $\mu\text{mol}$ ) was used as starting materials. Compound **S7b** (41.3 mg, 76%) was obtained as a colorless oil.

**$^1\text{H-NMR}$  (400 MHz,  $\text{CDCl}_3$ )**  $\delta$ : 6.02-5.89 (m, 3H), 5.41-5.17 (m, 7H), 4.66-4.57 (m, 2H), 4.39-4.10 (m, 10H), 4.03 (t,  $J = 9.5$  Hz, 1H), 3.93 (td,  $J = 9.5, 6.6$  Hz, 1H), 3.33-3.23 (m, 3H), 3.16 (td,  $J = 9.3, 4.2$  Hz, 1H), 2.44-2.37 (m, 2H), 2.31 (t,  $J = 7.5$  Hz, 2H), 2.15 (t,  $J = 7.7$  Hz, 2H), 1.87-1.79 (m, 2H), 1.62-1.58 (m, 4H), 1.25-1.25 (m, 38H), 0.88 (t,  $J = 6.7$  Hz, 6H).

**$^{13}\text{C-NMR}$  (100 MHz,  $\text{CDCl}_3$ )**  $\delta$ : 173.70, 173.43, 172.49, 135.02, 134.11, 132.12, 118.70, 118.14, 117.22, 81.73, 79.10, 78.46, 73.98, 71.67, 71.26, 70.91, 69.79, 68.90, 68.09, 65.71, 61.55, 38.34, 36.73, 33.97, 31.89, 31.85, 31.15, 29.66 (3C), 29.62 (2C), 29.59, 29.55, 29.49, 29.45, 29.35, 29.32 (2C), 29.28, 29.25, 29.09, 25.75, 24.79, 24.59, 22.65 (2C), 14.08 (2C).

**$^{31}\text{P-NMR}$  (160 MHz,  $\text{CDCl}_3$ )**  $\delta$ : -0.80.

**HRMS (ESI-TOF)** calcd for  $\text{C}_{49}\text{H}_{88}\text{NNaO}_{14}\text{P}$   $[\text{M}+\text{Na}]^+$  968.5835, found 968.5842.

#### Synthesis of inositol phospholipid derivative **S7c**

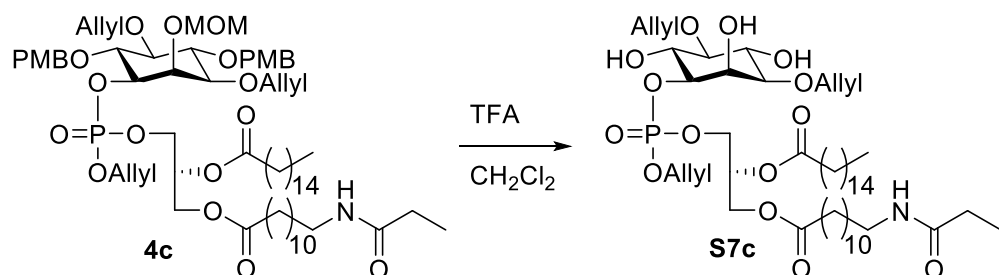

The title compound was synthesized following the procedure for **S7a**. **4c** (115 mg, 93.3  $\mu\text{mol}$ ) were used as starting materials. Compound **S7c** (59.9 mg, 68%) was obtained as a colorless oil.

**$^1\text{H-NMR}$  (400 MHz,  $\text{CDCl}_3$ )**  $\delta$ : 6.01-5.90 (m, 3H), 5.40-5.17 (m, 7H), 4.65-4.58 (m, 2H), 4.38-4.32 (m, 5H), 4.26-4.11 (m, 5H), 4.06-4.01 (m, 1H), 3.93 (td,  $J = 9.5, 5.0$  Hz, 1H), 3.28-3.14 (m, 4H), 2.35-2.29 (m, 4H), 2.20 (q,  $J = 7.6$  Hz, 2H), 1.63-1.57 (m, 4H), 1.50-1.46 (m, 2H), 1.30-1.24 (m, 38H),

1.15 (t,  $J = 7.6$  Hz, 3H), 0.88 (t,  $J = 6.8$  Hz, 3H).

**$^{13}\text{C}$ -NMR (100 MHz,  $\text{CDCl}_3$ )**  $\delta$ : 173.78, 173.40, 173.06, 134.99 (2C), 134.10, 118.70, 118.14, 117.20, 81.64, 79.11, 78.39, 73.93, 71.61, 71.38, 71.23, 69.34, 68.95, 68.27, 65.72, 61.73, 39.49, 34.10, 33.95, 31.87, 29.72, 29.65 (3C), 29.62, 29.60, 29.56, 29.45, 29.40, 29.38, 29.30 (3C), 29.25, 29.20, 29.13, 29.04, 28.99, 26.82, 24.77, 24.73, 22.64, 14.07, 9.90.

**$^{31}\text{P}$ -NMR (160 MHz,  $\text{CDCl}_3$ )**  $\delta$ : -0.96.

**HRMS (ESI-TOF)** calcd for  $\text{C}_{49}\text{H}_{88}\text{NNaO}_{14}\text{P}$   $[\text{M}+\text{Na}]^+$  968.5835, found 968.5839.

### Synthesis of PI 2a

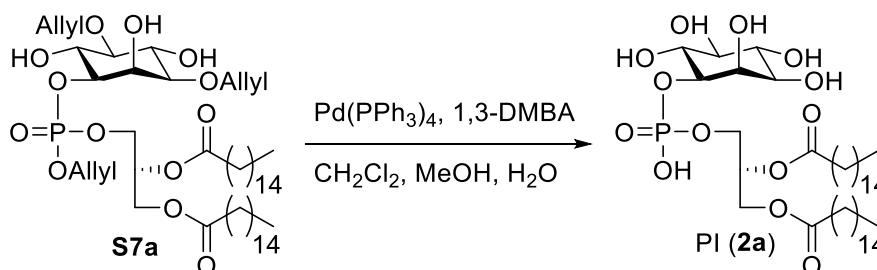

To a solution of **S7a** (55.5 mg, 59.6  $\mu\text{mol}$ ) and 1,3-dimethylbarbituric acid (55.8 mg, 358  $\mu\text{mol}$ ) in  $\text{CH}_2\text{Cl}_2/\text{MeOH}/\text{H}_2\text{O}$  (10/10/3) (5 mL) was added  $\text{Pd}(\text{PPh}_3)_4$  (68.9 mg, 59.6  $\mu\text{mol}$ ). The resulting mixture was stirred at room temperature for 4 h. The reaction was concentrated under reduced pressure. The crude mixture was purified by column chromatography of  $\text{SiO}_2$  with  $\text{CHCl}_3$ -MeOH (10:1 to 1:1) and metal scavenger SiliaMetS® DMT with  $\text{CHCl}_3$ -MeOH (10:1 to 1:1) and  $\text{SiO}_2$  with  $\text{CHCl}_3$ -MeOH (10:1 to 1:1) to give **PI 2a** (13.5 mg, 28%) as white solid. The purity of **2a** was 99% (measured by quantitative NMR using  $\text{CHBr}_3$  as an internal standard).

**$^1\text{H}$ -NMR (800 MHz,  $\text{CDCl}_3:\text{CD}_3\text{OD}:\text{D}_2\text{O} = 70:40:6$ )**  $\delta$ : 5.25-5.24 (m, 1H), 4.42 (dd,  $J = 11.9, 2.8$  Hz, 2H), 4.20-4.16 (m, 1H), 4.08-3.99 (m, 2H), 3.89-3.85 (m, 1H), 3.74 (t,  $J = 9.6$  Hz, 1H), 3.62 (t,  $J = 9.6$  Hz, 1H), 3.42 (dd,  $J = 10.1, 2.8$  Hz, 1H), 3.24 (t,  $J = 9.2$  Hz, 1H), 2.33 (t,  $J = 7.3$  Hz, 2H), 2.30 (t,  $J = 7.8$  Hz, 2H), 1.61-1.56 (m, 4H), 1.31-1.22 (m, 48H), 0.87 (t,  $J = 6.9$  Hz, 6H).

**$^{13}\text{C}$ -NMR (200 MHz,  $\text{CDCl}_3:\text{CD}_3\text{OD}:\text{D}_2\text{O} = 70:40:6$ )**  $\delta$ : 173.88, 173.57, 76.19, 74.02, 72.06, 71.30, 71.08, 70.81, 70.15, 63.21, 62.49, 33.77, 33.64, 31.45 (2C), 29.22 (4C), 29.19 (2C), 29.17 (2C), 29.11 (2C), 29.07 (2C), 28.92 (2C), 28.87 (2C), 28.69 (2C), 28.66 (2C), 24.46, 24.40, 22.18 (2C), 13.44 (2C).

**$^{31}\text{P}$ -NMR (160 MHz,  $\text{CDCl}_3:\text{CD}_3\text{OD}:\text{D}_2\text{O} = 70:40:6$ )**  $\delta$ : 0.03.

**HRMS (ESI-TOF)** calcd for  $\text{C}_{41}\text{H}_{78}\text{O}_{13}\text{P}$   $[\text{M}-\text{H}]^-$  809.5195, found 809.5186.



### Synthesis of PI derivative 2b

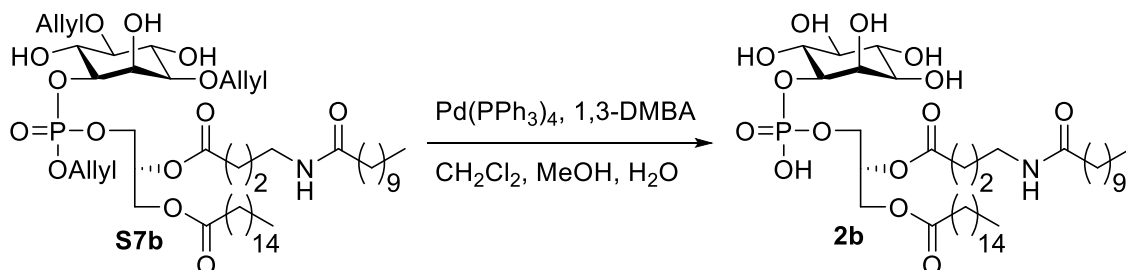

The title compound was synthesized following the procedure for **2a**. **S7b** (41.3 mg, 43.7  $\mu$ mol) were used as starting materials. Compound **2b** (13.0 mg, 34%) was obtained as a colorless oil. The purity of **2b** was 98% (measured by quantitative NMR using CHBr<sub>3</sub> as an internal standard).

**<sup>1</sup>H-NMR (800 MHz, CDCl<sub>3</sub>:CD<sub>3</sub>OD:D<sub>2</sub>O = 70:40:6)**  $\delta$ : 5.26-5.23 (m, 1H), 4.40 (dd,  $J$  = 12.2, 3.0 Hz, 1H), 4.20-4.17 (m, 2H), 4.05 (t,  $J$  = 5.5 Hz, 2H), 3.92-3.88 (m, 1H), 3.75 (t,  $J$  = 9.4 Hz, 1H), 3.63 (t,  $J$  = 9.6 Hz, 1H), 3.43 (dd,  $J$  = 9.9, 3.0 Hz, 1H), 3.25 (t,  $J$  = 9.4 Hz, 1H), 3.21 (td,  $J$  = 7.1, 2.8 Hz, 2H), 2.46-2.33 (m, 2H), 2.31 (t,  $J$  = 7.6 Hz, 2H), 2.17 (t,  $J$  = 7.8 Hz, 2H), 1.83-1.78 (m, 2H), 1.61-1.56 (m, 4H), 1.30-1.24 (m, 38H), 0.89-0.86 (m, 6H).

**<sup>13</sup>C-NMR (200 MHz, CDCl<sub>3</sub>:CD<sub>3</sub>OD:D<sub>2</sub>O = 70:40:6)**  $\delta$ : 175.68, 174.93, 174.02, 77.02, 74.93, 73.02, 72.30, 72.01, 71.79, 71.51, 64.35, 63.21, 38.95, 36.88, 34.50, 32.41, 32.39, 31.89, 30.18 (3C), 30.13 (3C), 30.09, 30.04, 30.02, 29.89, 29.83 (2C), 29.81 (2C), 29.63, 26.44, 25.31, 24.86, 23.13 (2C), 14.39 (2C).

**<sup>31</sup>P-NMR (240 MHz, CDCl<sub>3</sub>:CD<sub>3</sub>OD:D<sub>2</sub>O = 70:40:6)**  $\delta$ : 0.06.

**HRMS (ESI-TOF)** calcd for C<sub>40</sub>H<sub>75</sub>O<sub>14</sub>P [M-H]<sup>-</sup> 824.4931, found 824.4935.

### Synthesis of PI derivative 2c

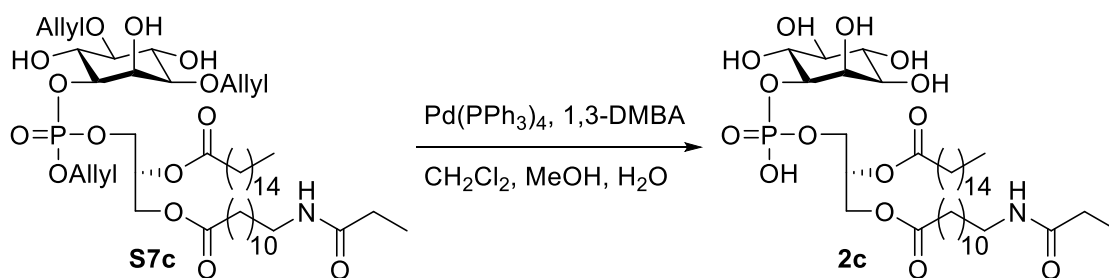

The title compound was synthesized following the procedure for **2a**. **S7c** (59.9 mg, 63.3  $\mu$ mol) were

used as starting materials. Compound **2c** (16.2 mg, 31%) was obtained as a colorless oil. The purity of **2c** was 98% (measured by quantitative NMR using CHBr<sub>3</sub> as an internal standard).

**<sup>1</sup>H-NMR (800 MHz, CDCl<sub>3</sub>:CD<sub>3</sub>OD:D<sub>2</sub>O = 70:40:6)** δ: 5.27-5.21 (m, 1H), 4.47-4.39 (m, 1H), 4.20-4.14 (m, 2H), 4.07-3.97 (m, 2H), 3.93-3.86 (m, 1H), 3.74 (t, *J* = 9.5 Hz, 1H), 3.62 (t, *J* = 9.7 Hz, 1H), 3.43 (dd, *J* = 9.6, 2.3 Hz, 1H), 3.24 (t, *J* = 9.3 Hz, 1H), 3.15 (t, *J* = 7.2 Hz, 2H), 2.35-2.27 (m, 4H), 2.18 (q, *J* = 7.6 Hz, 2H), 1.61-1.55 (m, 4H), 1.50-1.43 (m, 2H), 1.33-1.21 (m, 38H), 1.12 (t, *J* = 7.6 Hz, 3H), 0.86 (t, *J* = 6.7 Hz, 3H).

**<sup>13</sup>C-NMR (200 MHz, CDCl<sub>3</sub>:CD<sub>3</sub>OD:D<sub>2</sub>O = 70:40:6)** δ: 176.21, 174.92, 174.62, 77.03, 74.91, 73.00, 72.27, 72.05, 71.77, 71.09, 64.30, 63.48, 40.04, 34.75, 34.60, 32.45, 30.21 (2C), 30.17 (2C), 30.08, 30.05, 30.00 (2C), 29.92 (2C), 29.88 (2C), 29.82, 29.64 (2C), 27.47, 25.44, 25.34, 23.18, 14.44, 10.43.

**<sup>31</sup>P-NMR (160 MHz, CDCl<sub>3</sub>:CD<sub>3</sub>OD:D<sub>2</sub>O = 70:40:6)** δ: 2.09.

**HRMS (ESI-TOF)** calcd for C<sub>40</sub>H<sub>75</sub>O<sub>14</sub>P [M-H]<sup>-</sup> 824.4931, found 824.4940.

## **2. Biology**

### **DCAR Reporter Assay**

2B4-NFAT-GFP reporter cells expressing DCAR + FcR $\gamma$  were prepared as previously described<sup>9</sup>. For stimulation of reporter cells, compounds were diluted in isopropanol (Nacalai tesque) and added on 96-well plates (Corning) at 20  $\mu$ L/well.<sup>10</sup> After evaporation of the solvent, the cells were stimulated with plate-coated lipids. Anti-flag tag antibody (Wako) was dissolved in NaHCO<sub>3</sub> buffer (10  $\mu$ g/ml) and 50  $\mu$ l of the antibody solution were incubated in DOTAP (Avanti) coated 96-well plate wells for 2 h at 37 °C.

### **Ac<sub>1</sub>PIM<sub>2</sub>**

Ac<sub>1</sub>PIM<sub>2</sub> was purified from *M. bovis* BCG as previous described.<sup>11</sup>

### **HEK- Blue Reporter Assay**

The induction of NF- $\kappa$ B in a reporter gene assay was quantified using HEK-Blue mTLR2 and hTLR2 cells (Invivogen). HEK-Blue cells were cultured in DMEM (Nacalai tesque) supplemented with 10% fetal bovine serum (FBS; Biowest), 1% penicillin–streptomycin (Gibco) and 100  $\mu$ g/mL Normocin. The cells were seeded into 96-well plates (1.0  $\times 10^5$  cells/well), and ligands were added with the indicated concentrations before incubation at 37 °C for 24 h. SEAP was measured using a HEK-Blue Detection (Invivogen).

### **APC (Antigen Presenting Cell)-free Assay for CD1d-Lipid Binding<sup>1, 2</sup>**

Initially, 96-well microplates (multiwell plate 96F, Sumitomo Bakelite Co., Ltd.) were coated with mouse CD1d:Ig fusion protein (0.25  $\mu$ g/well, BD Biosciences) in PBS (100  $\mu$ L) at 37 °C for 24 h. After washing with PBS, various concentrations of compounds in PBS containing 1% DMSO and 0.005% TritonX-100 were added and incubated at 37 °C for 24 h. After washing with PBS, 2E10 NKT hybridoma cells<sup>12</sup> ( $2.5 \times 10^5$  cells/well) were added and cultured at 37 °C for 48 h. IL-2 in the supernatant were measured by ELISA kit (Affymetrix). 2E10 NKT hybridoma cells were a kind gift of Prof. Kazuya Iwabuchi (Kitasato University).

### **Binding Studies**

The AlphaScreen assay (PerkinElmer Life Science) was used to determine receptor (mouse TLR2, human TLR2 and mouse CD1d) -ligand interactions.<sup>3,4</sup> For analysis of mouse TLR2-ligand interaction, mouse TLR2-Fc (R&D systems, final concentration 10 nM) was mixed with Pam2CSK4-biotin (InvivoGen, final concentration 10 nM), in PBS containing 0.05 % human serum albumin. After 45 min, compounds (concentration range 3 nM-30  $\mu$ M) was added and incubation was continued for another 45 min. Next, 10  $\mu$ g/mL streptavidin donor beads and 10  $\mu$ g/mL Protein-A acceptor beads were added and incubated for 45 min. Samples were measured at 680 nm in EnSpire™ Alpha (PerkinElmer) or Spark 10M (Tecan Ltd.). Data were analyzed using Graphpad Prism (GraphPad Software Inc.).

For analysis of human TLR2-ligand interaction, human TLR2-His tag (R&D systems, final concentration 15 nM) was mixed with Pam2CSK4-biotin (InvivoGen, final concentration 15 nM), in PBS containing 0.05 % human serum albumin. After 45 min, compounds (concentration range 3 nM-30  $\mu$ M) was added and incubation was continued for another 45 min. Next, 10  $\mu$ g/mL streptavidin donor beads and 10  $\mu$ g/mL Ni chelate acceptor beads were added and incubated for 45 min. Samples were measured at 680 nm in EnSpire™ Alpha (PerkinElmer) or Spark 10M (Tecan Ltd.). Data were analyzed using Graphpad Prism (GraphPad Software Inc.).

For analysis of mouse CD1d-ligand interaction, mouse CD1d-IgG (BD Biosciences, final concentration 5 nM) was mixed with 10  $\mu$ g/mL anti-mouse IgG acceptor beads in PBS containing 0.005% Tween 20. After 1 h, Biotinyl-PE (Avanti, final concentration 2 mM) and compounds (concentration range 3 nM-30  $\mu$ M) was added to the plate. After incubation at 37 °C for 18 h, 10  $\mu$ g/mL streptavidin donor beads was added and incubation was continued for another 1 h. Samples were measured at 680 nm in EnSpire™ Alpha (PerkinElmer) or Spark 10M (Tecan Ltd.). Data were analyzed using Graphpad Prism (GraphPad Software Inc.).

### **Inflammatory cytokine induction assay**

Mouse macrophages (RAW264.7 cells) were purchased from ATCC (TIB-71). These cells were

cultured as monolayers in RPMI-1640 (Nacalai Tesque) supplemented with 10% fetal bovine serum (FBS; Biowest), and 1% penicillin–streptomycin (Gibco). The cells were seeded into 96-well plates ( $5.0 \times 10^4$  cells/well), and ligands were added with the indicated concentrations before incubation at 37 °C for 24 h. Cytokine release was measured using an ELISA kit (Affymetrix).

Bone marrow cells were flushed from the tibias and femurs of C57BL/6J mice (Charles River) with PBS. For BMDCs differentiation, the cell suspension was cultured at a density of  $1.0 \times 10^6$  cells/mL in RPMI-1640 (Nacalai Tesque) supplemented with 10% fetal bovine serum (FBS; Biowest), 1% penicillin–streptomycin (Gibco) and 20 ng/mL GM-CSF. On day 3, fresh medium containing GM-CSF was added and on day 5 one half of the medium was renewed. BMDCs were harvested on day 8 and seeded into 96-well plates ( $2.0 \times 10^5$  cells/well), and ligands were added with the indicated concentrations before incubation at 37 °C for 24 h. Cytokine release was measured using an ELISA kit (Affymetrix).

### 3. NMR spectra

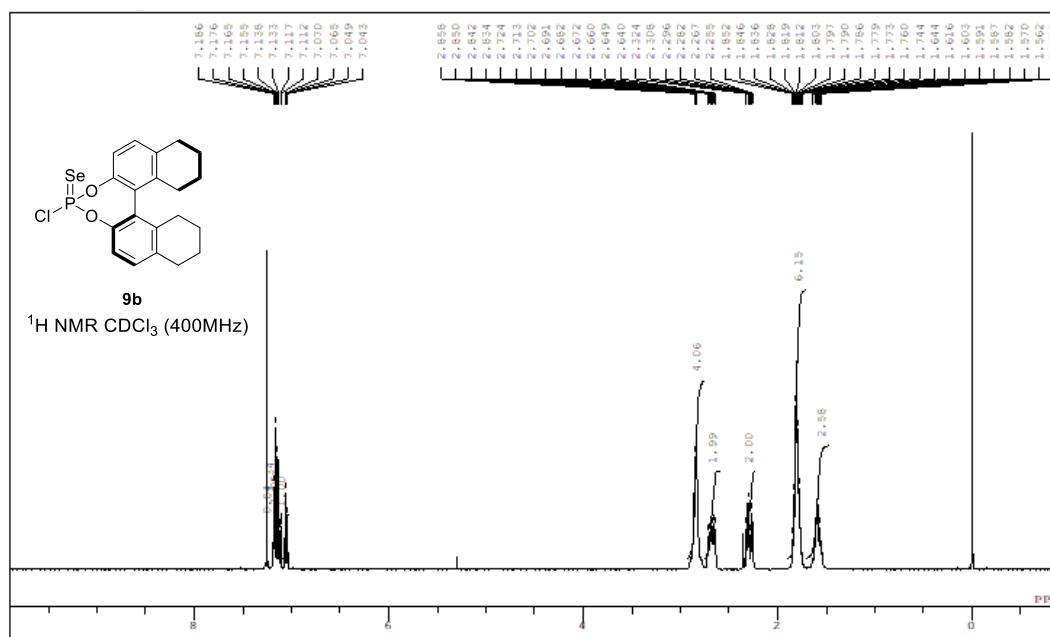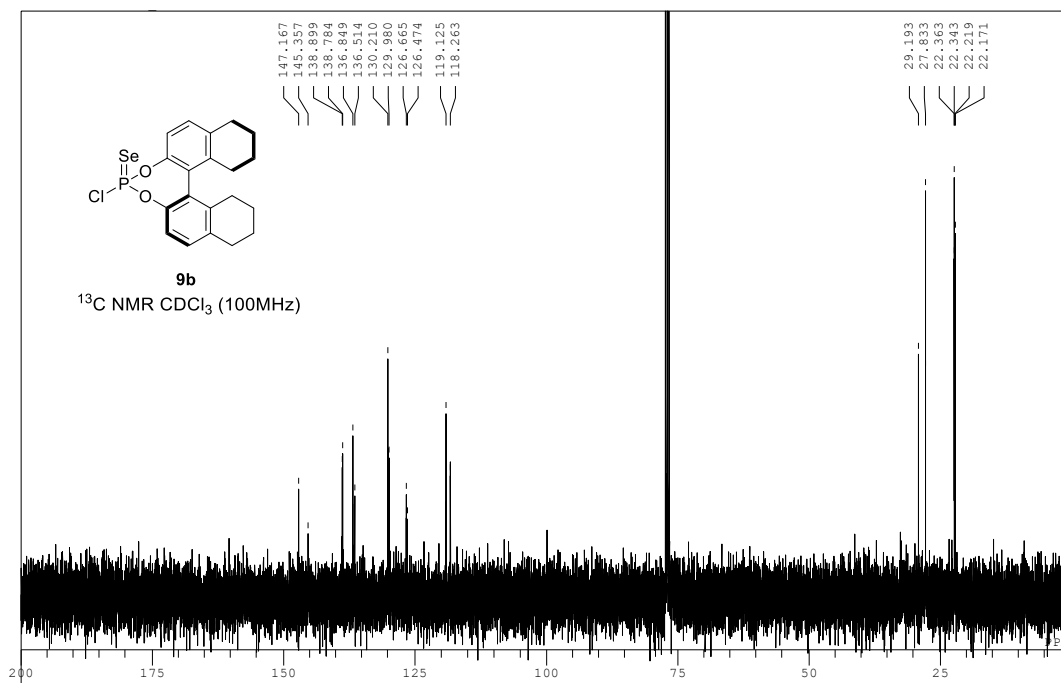

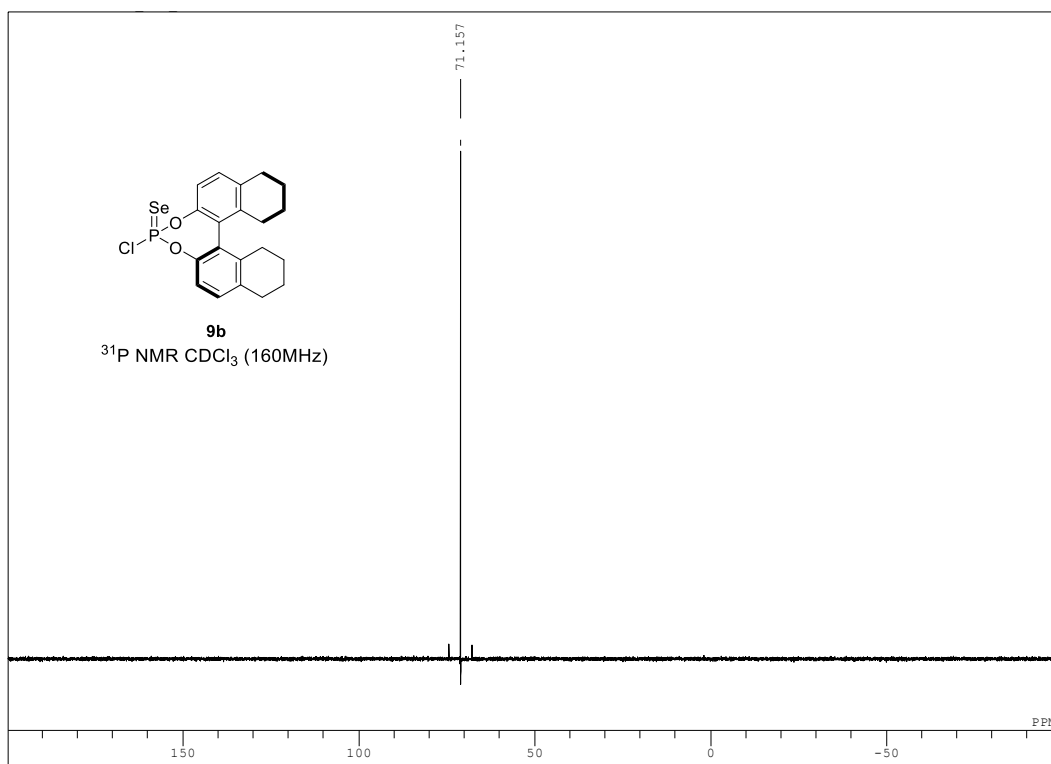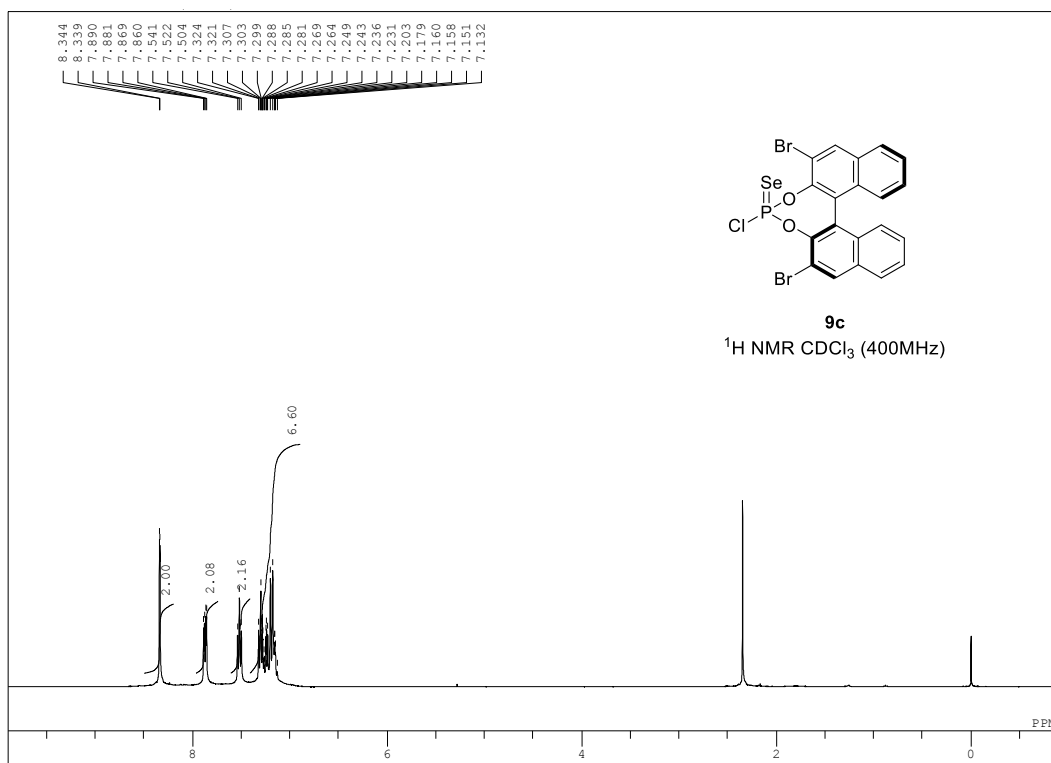

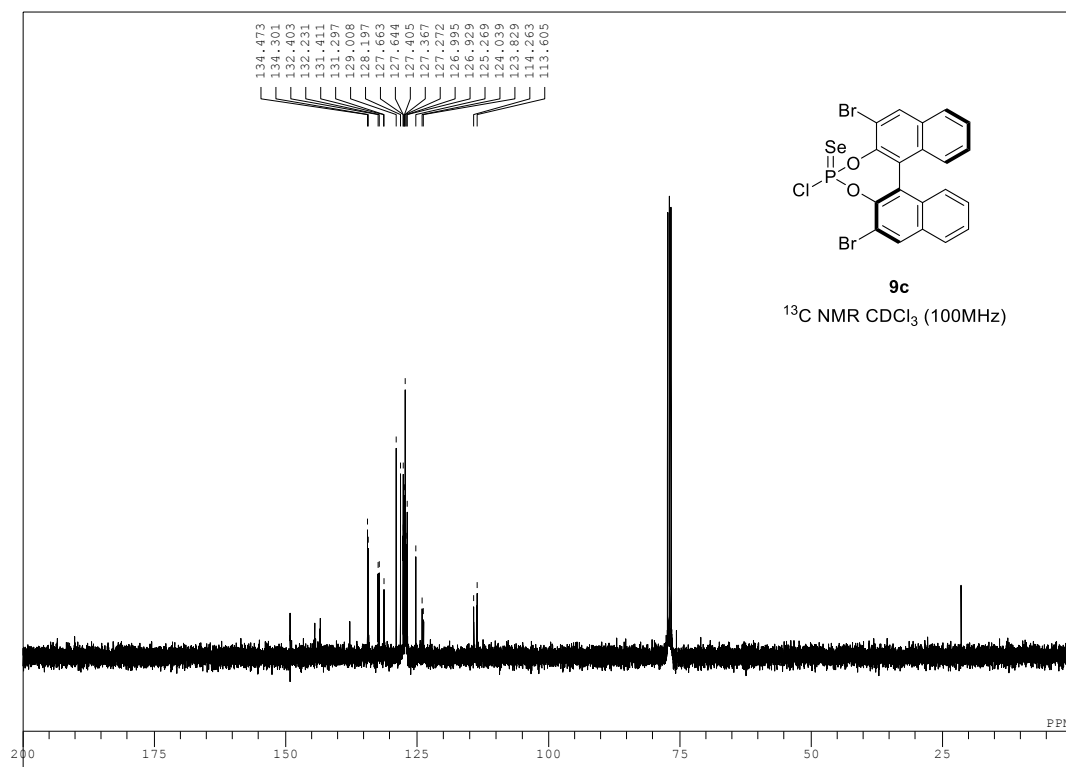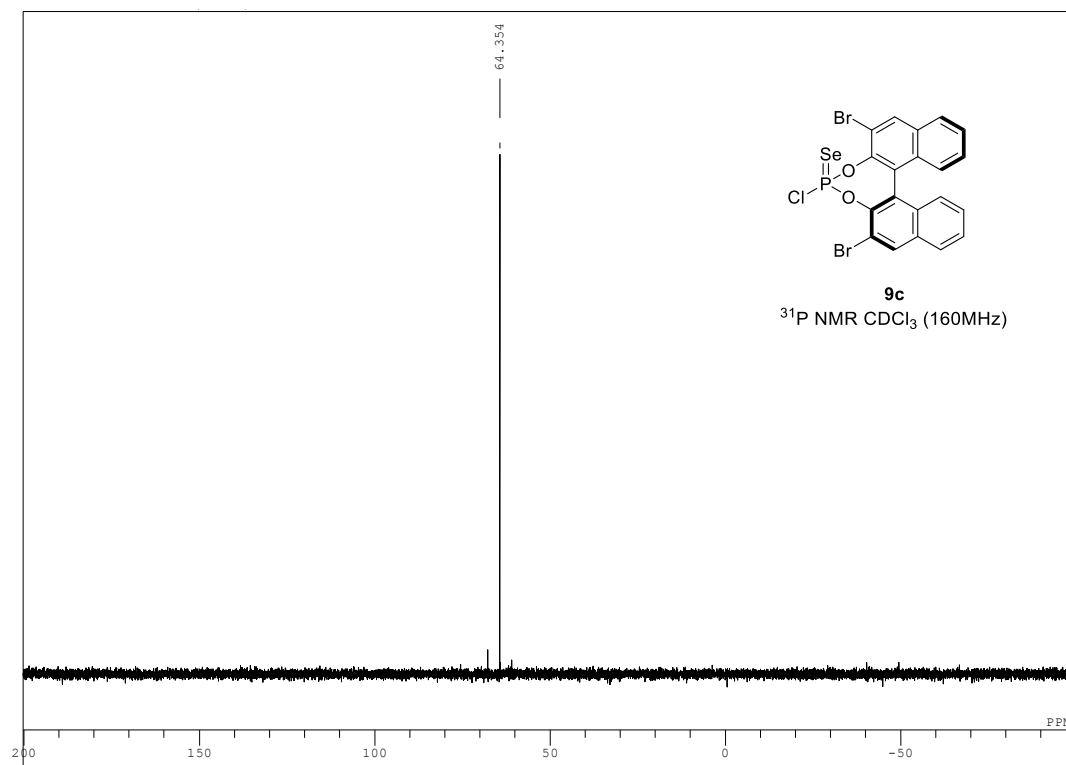





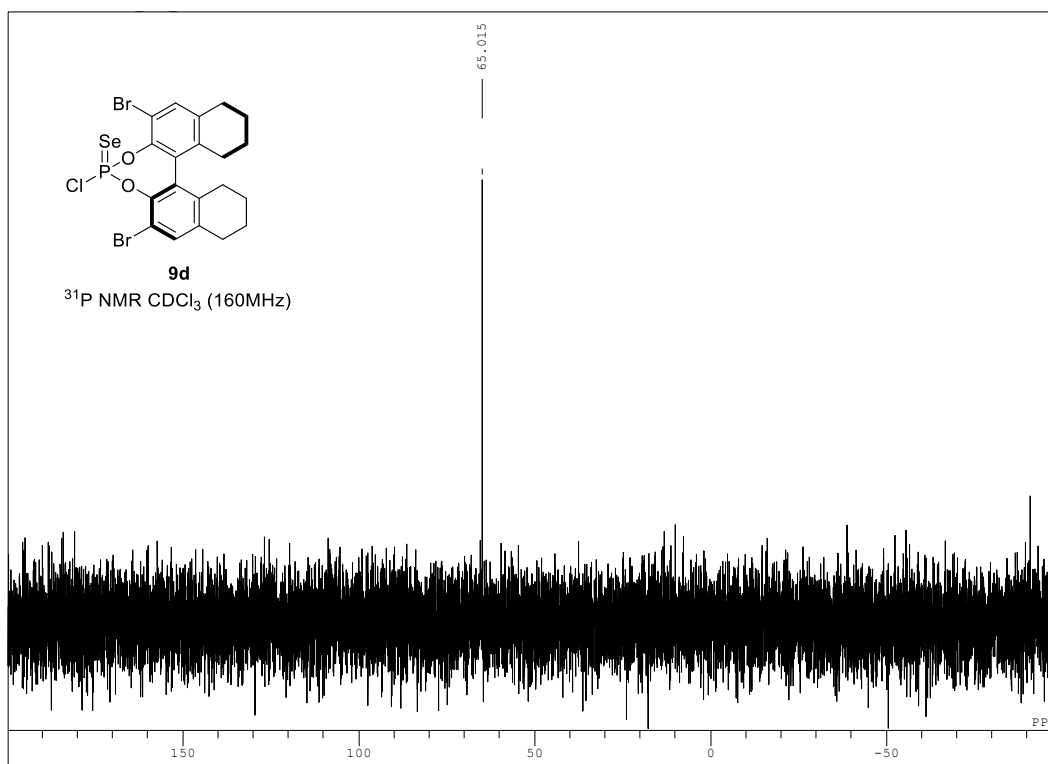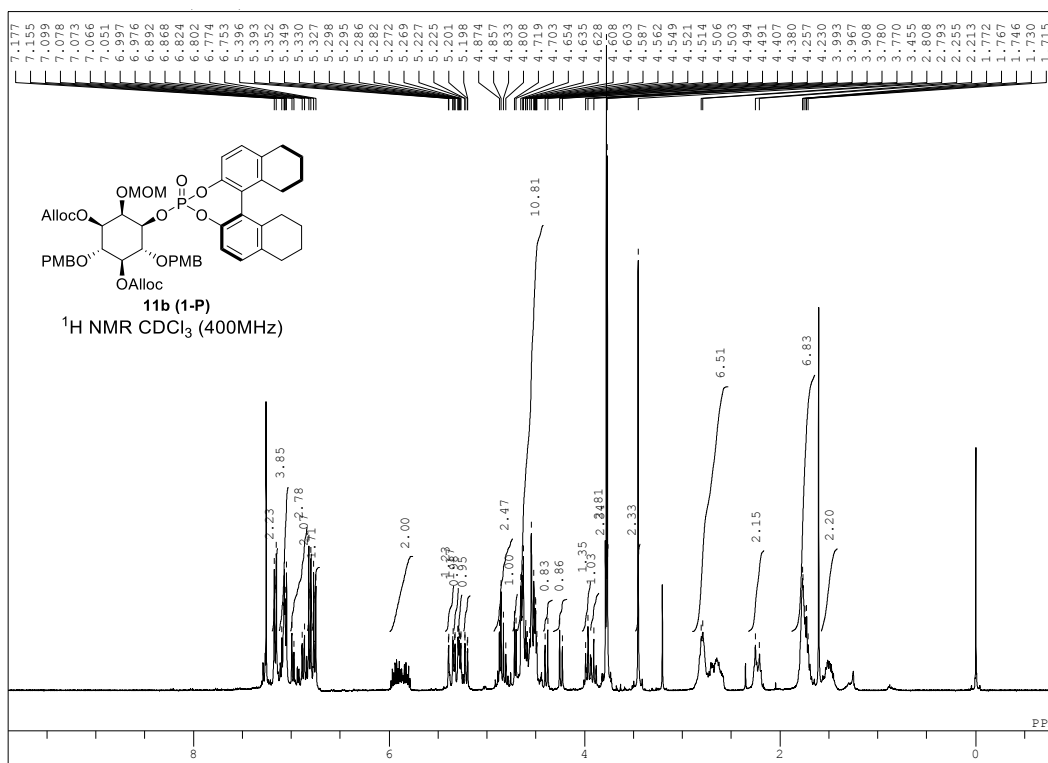

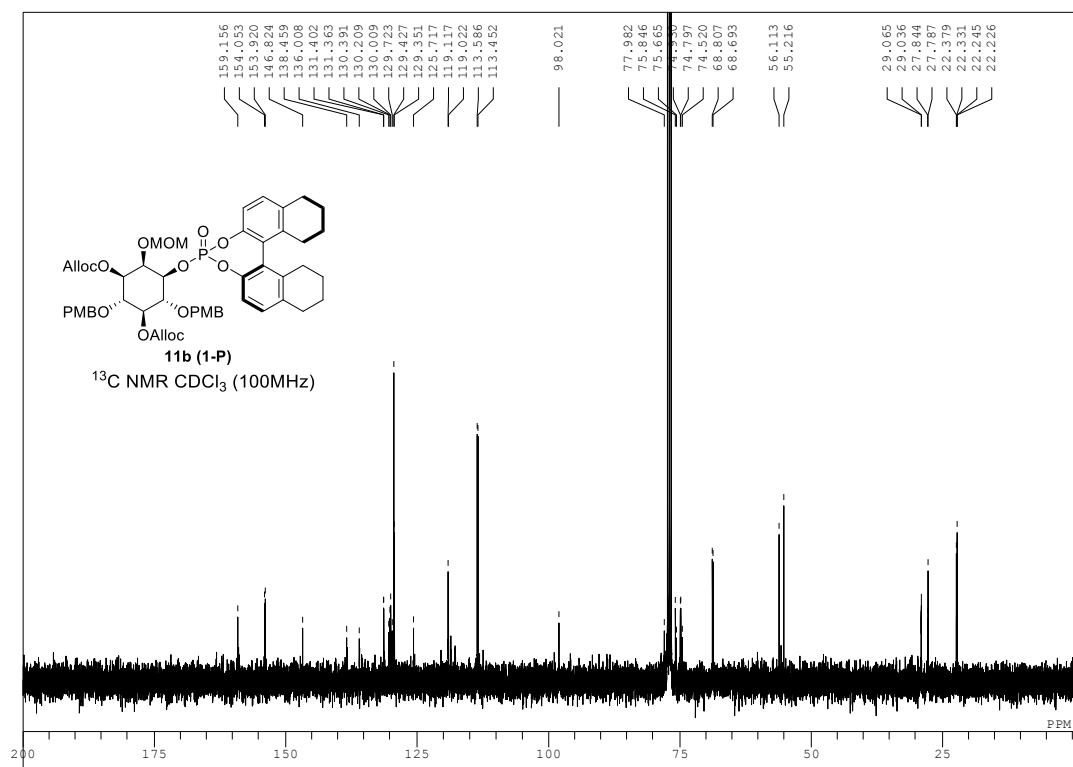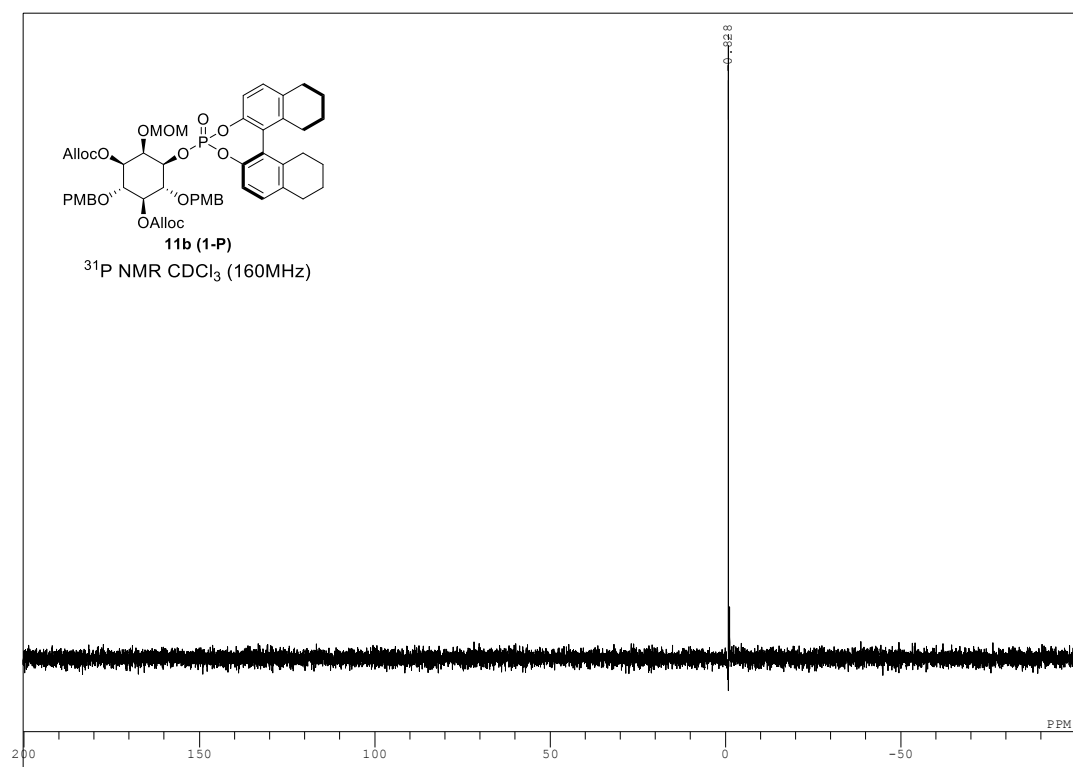

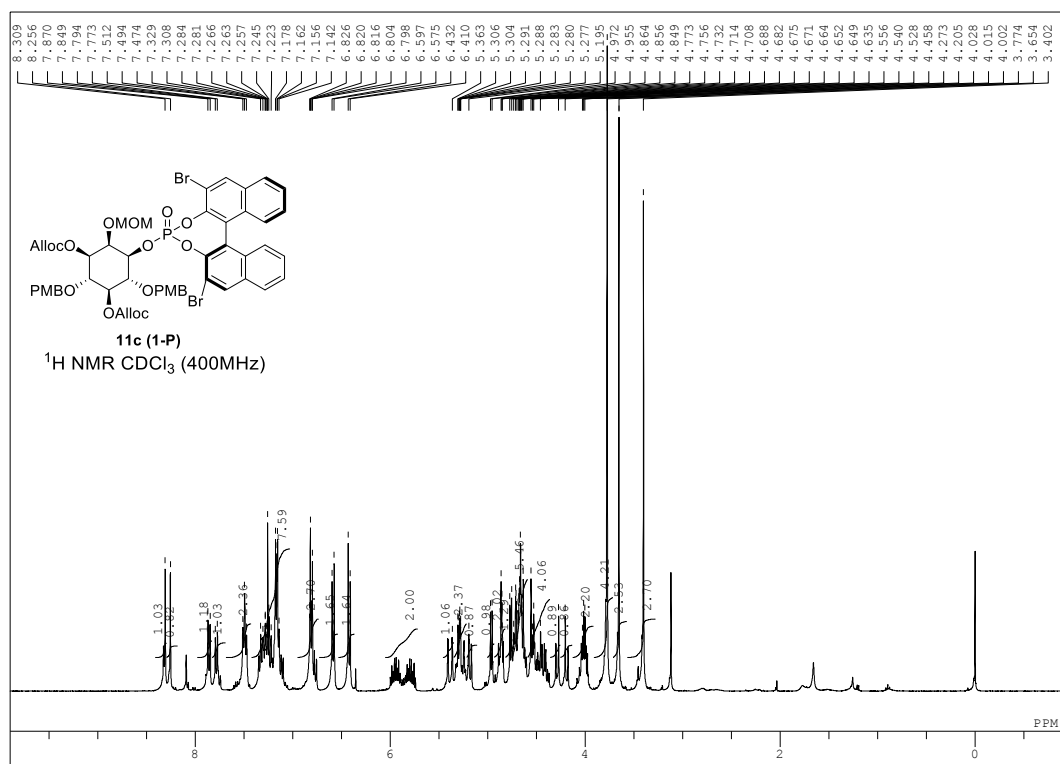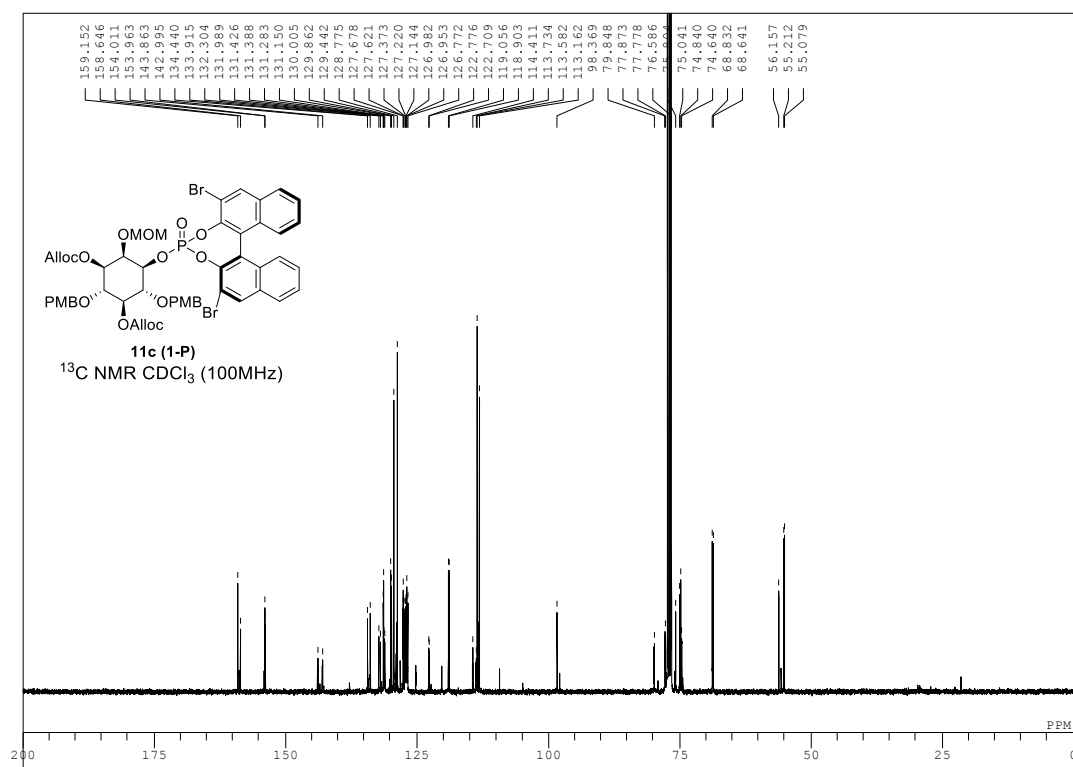



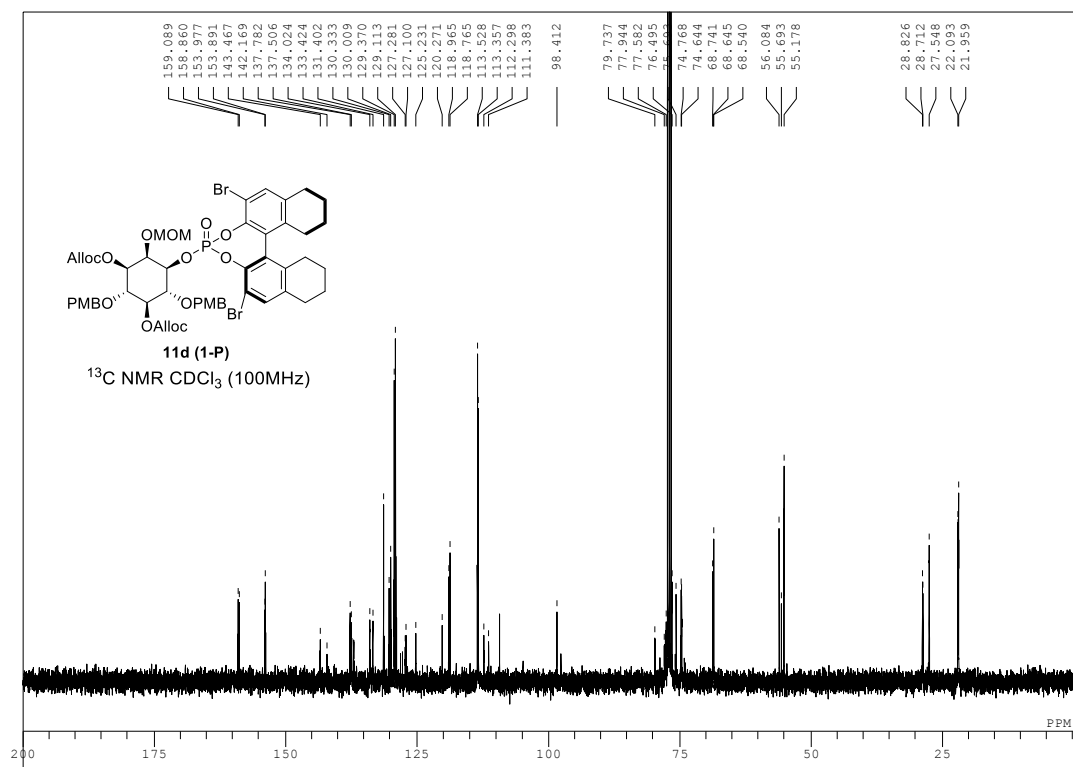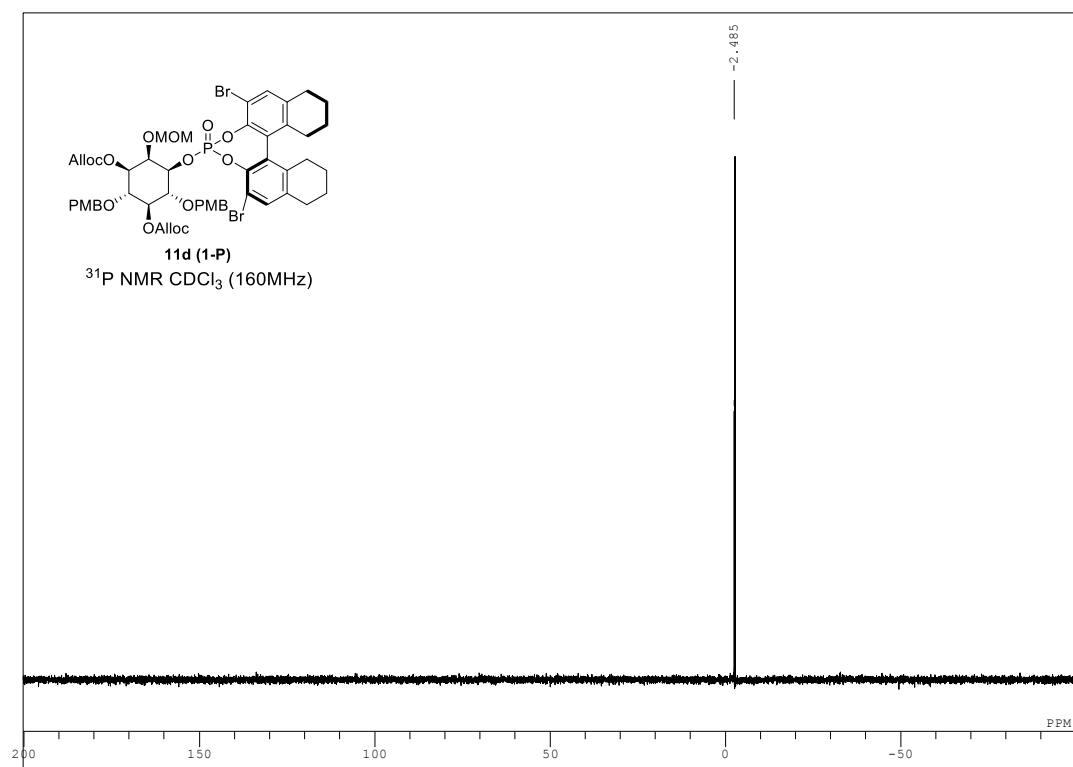

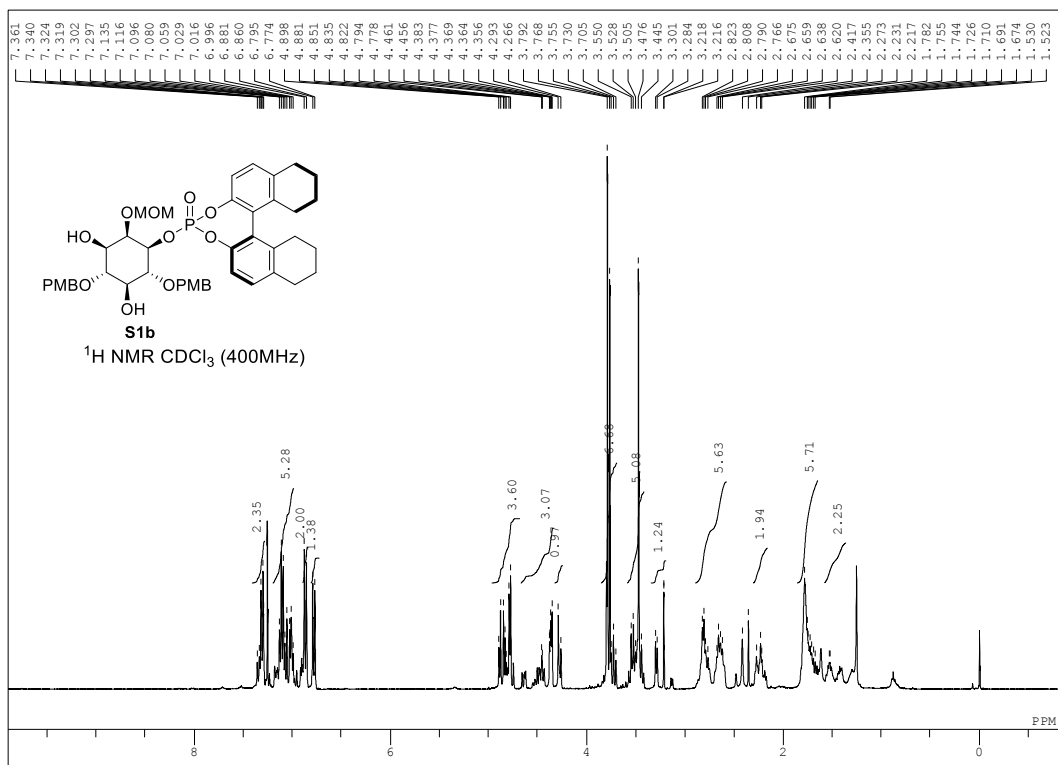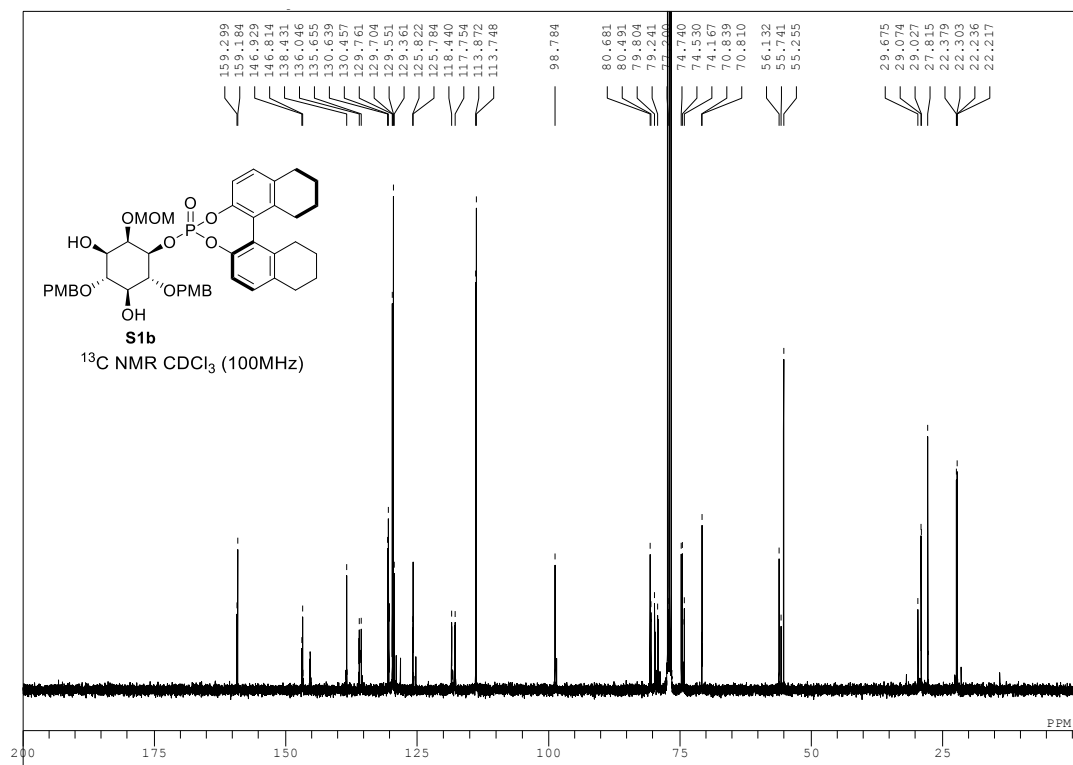





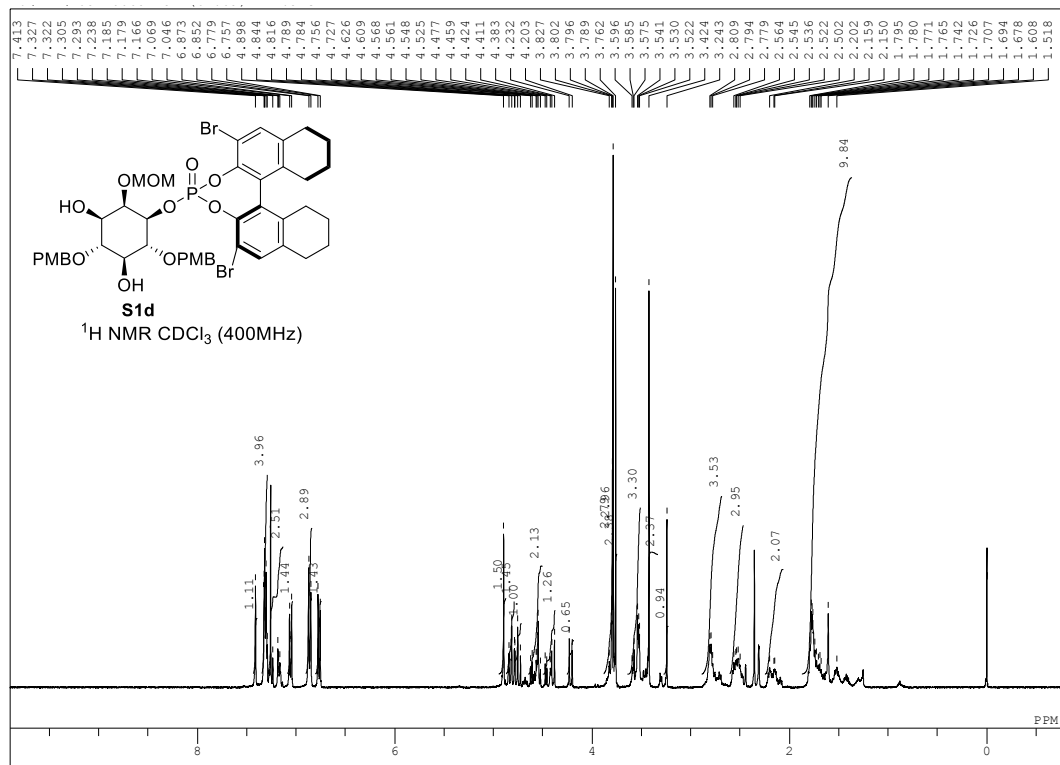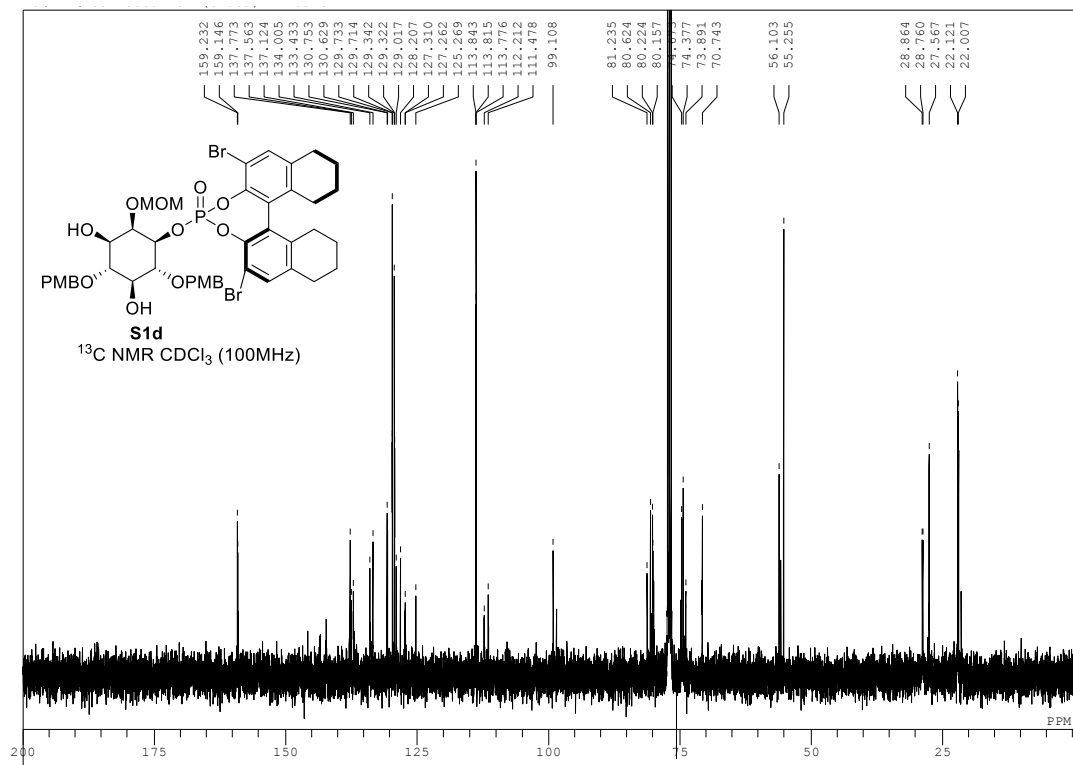



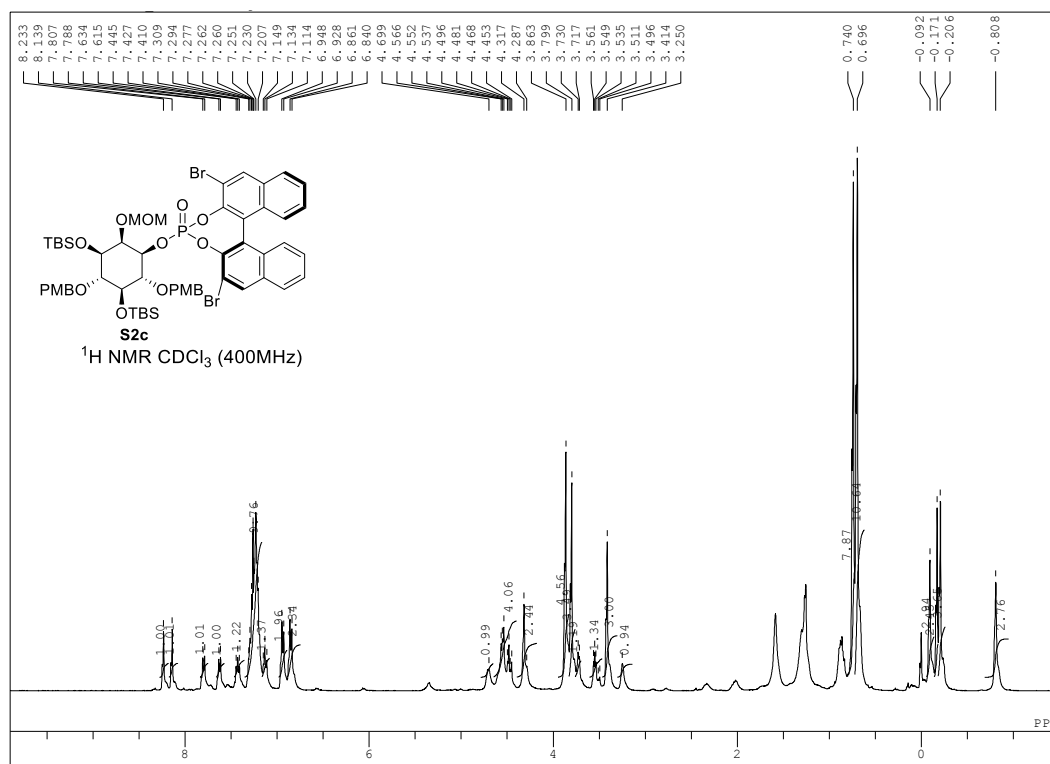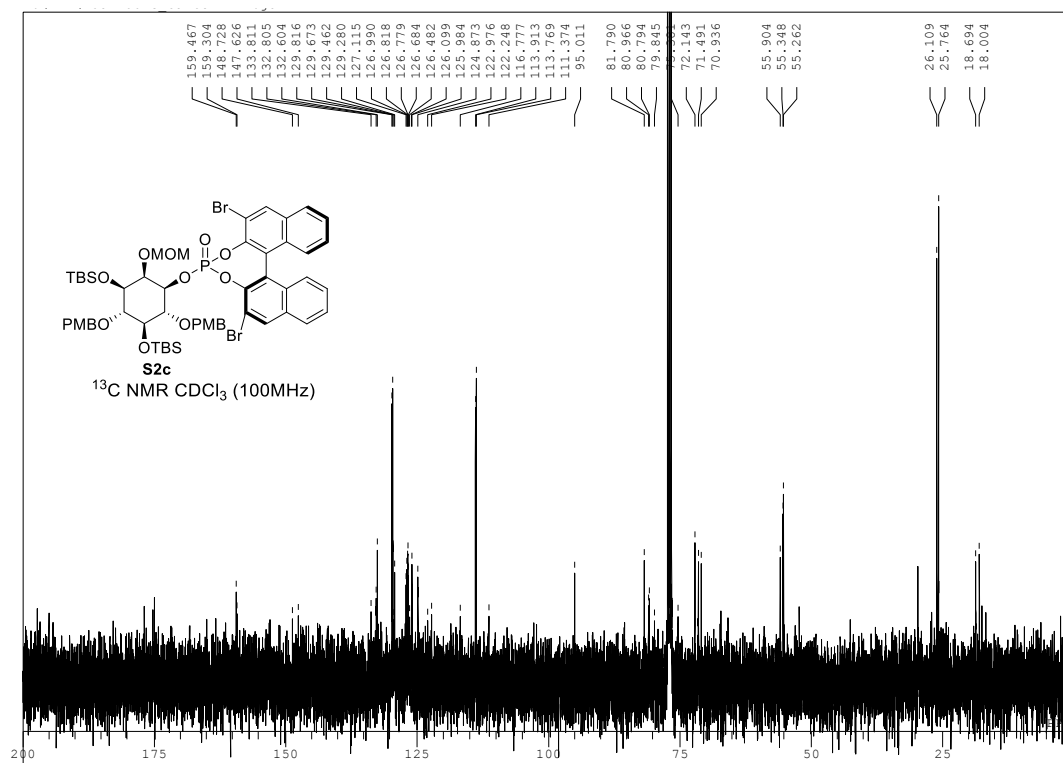



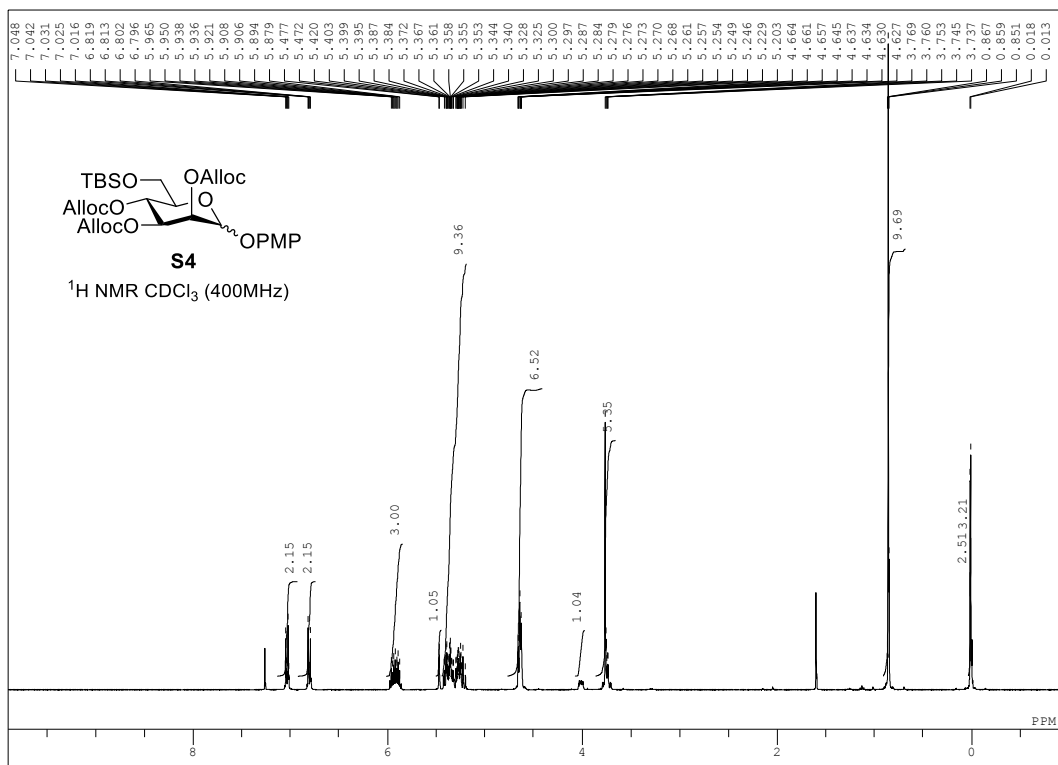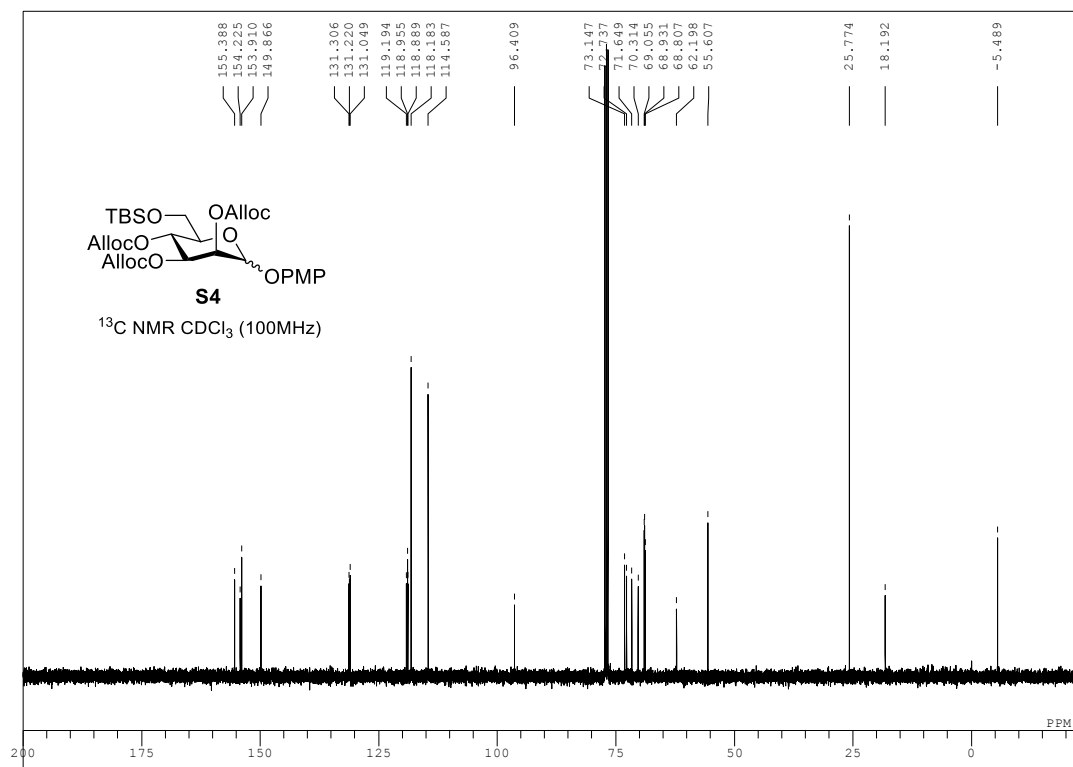

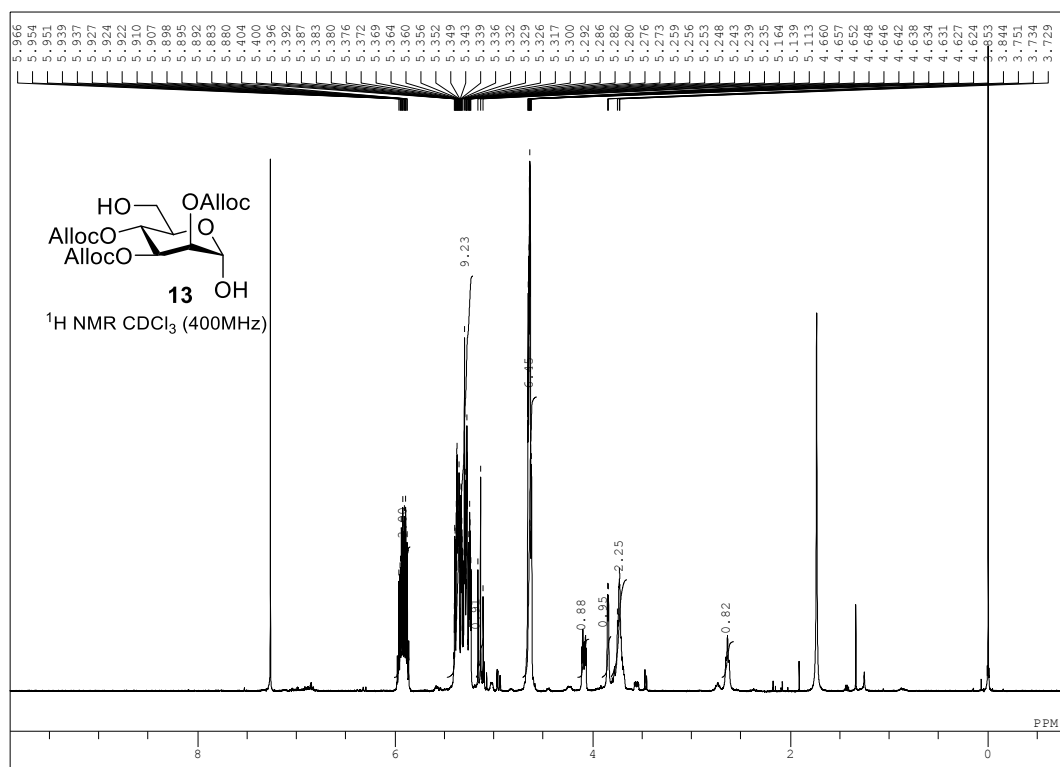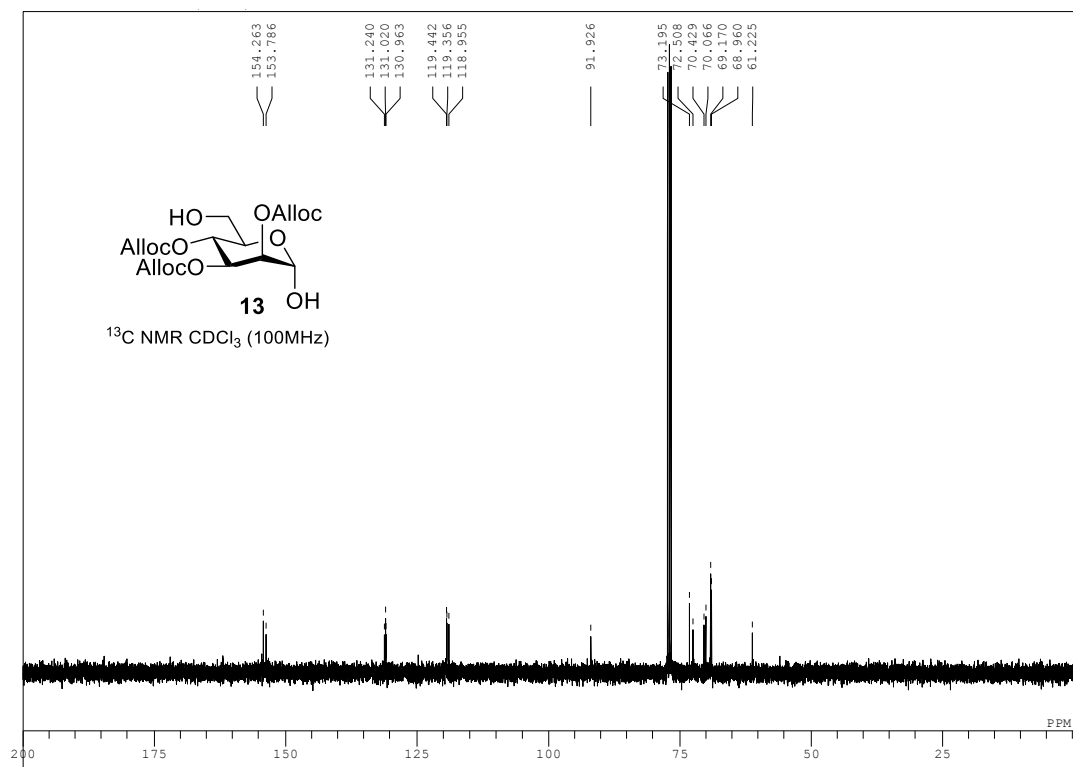



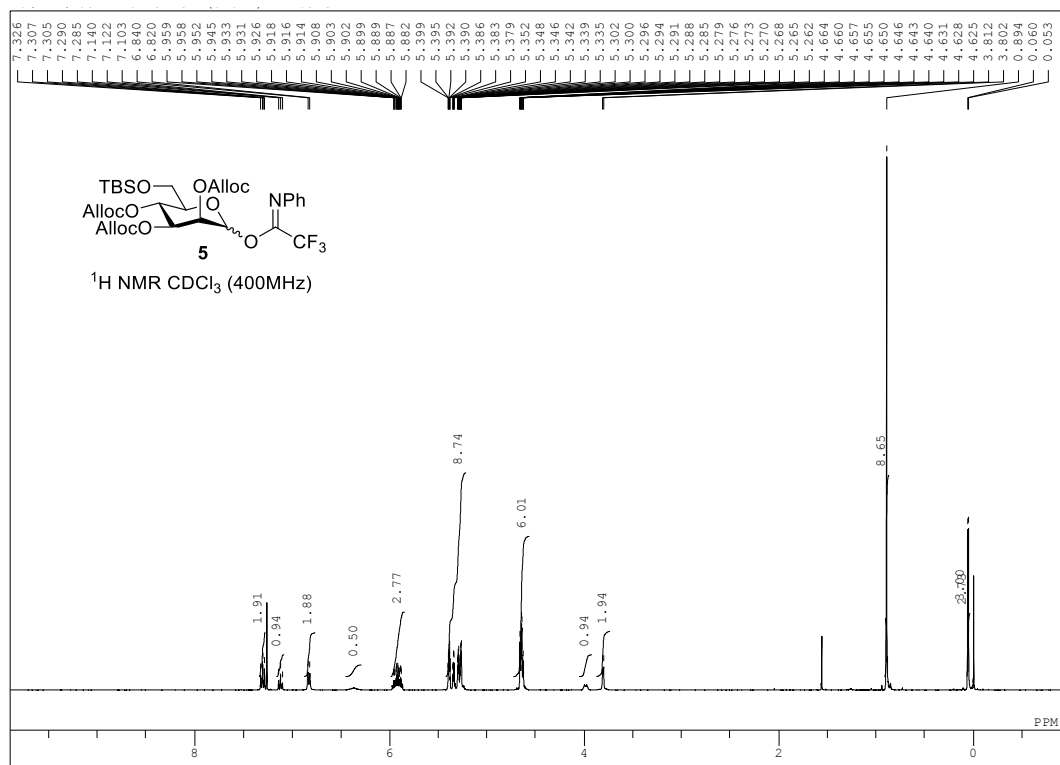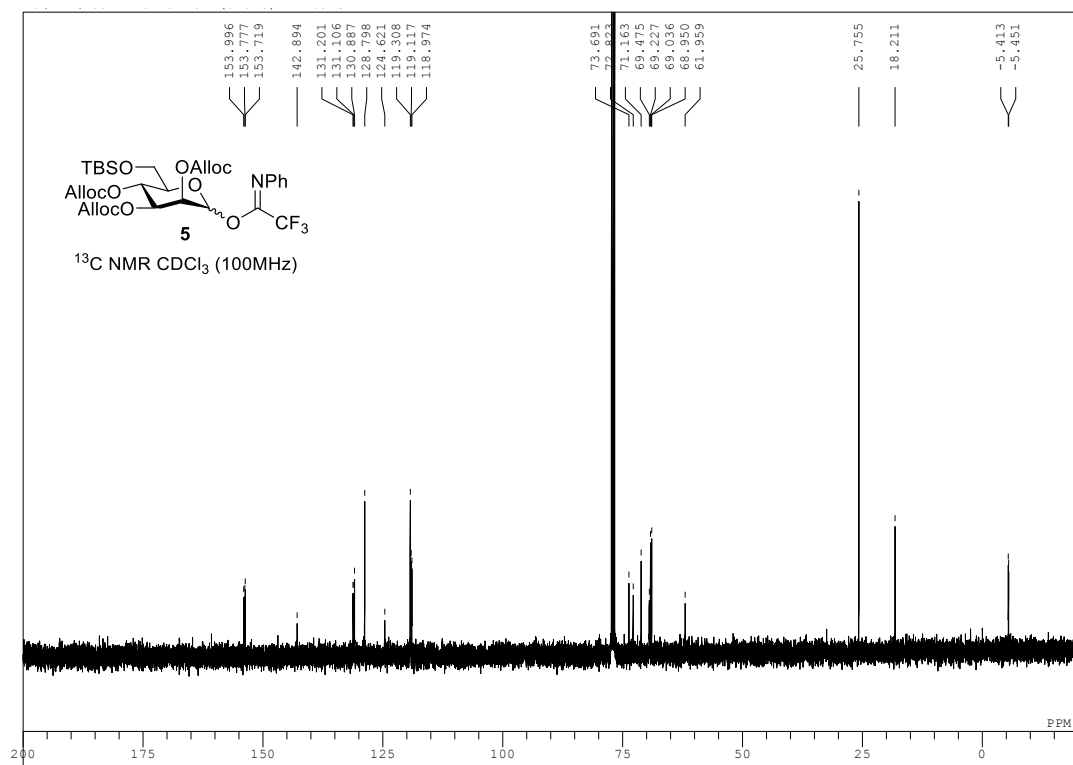





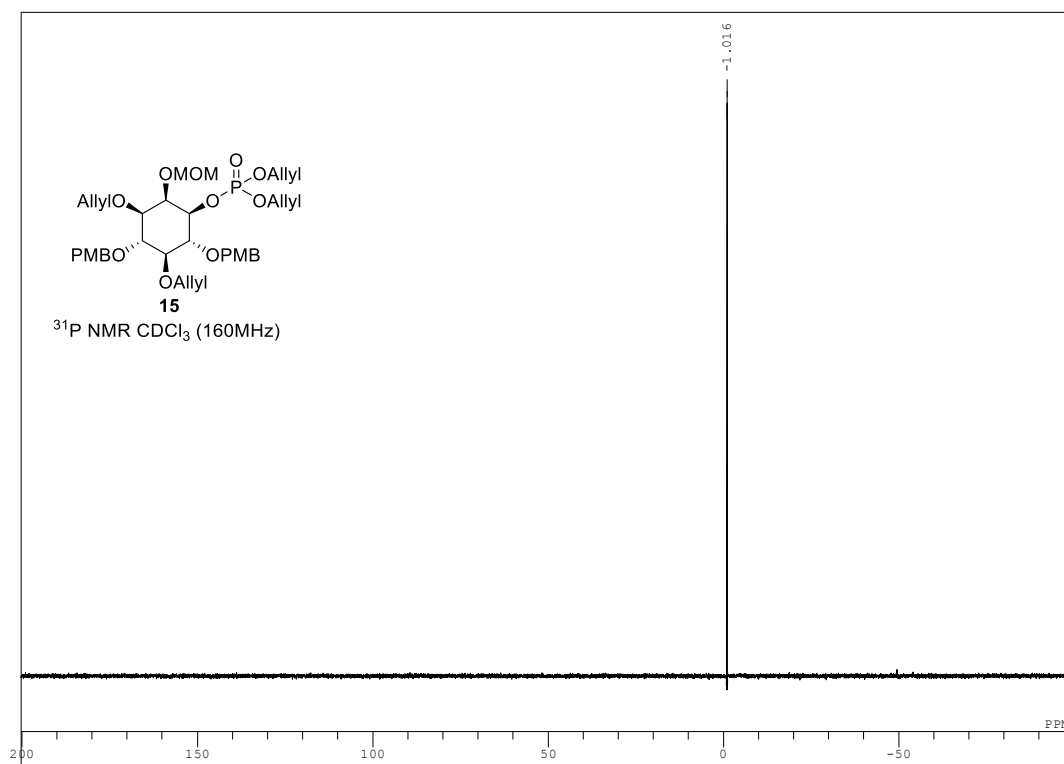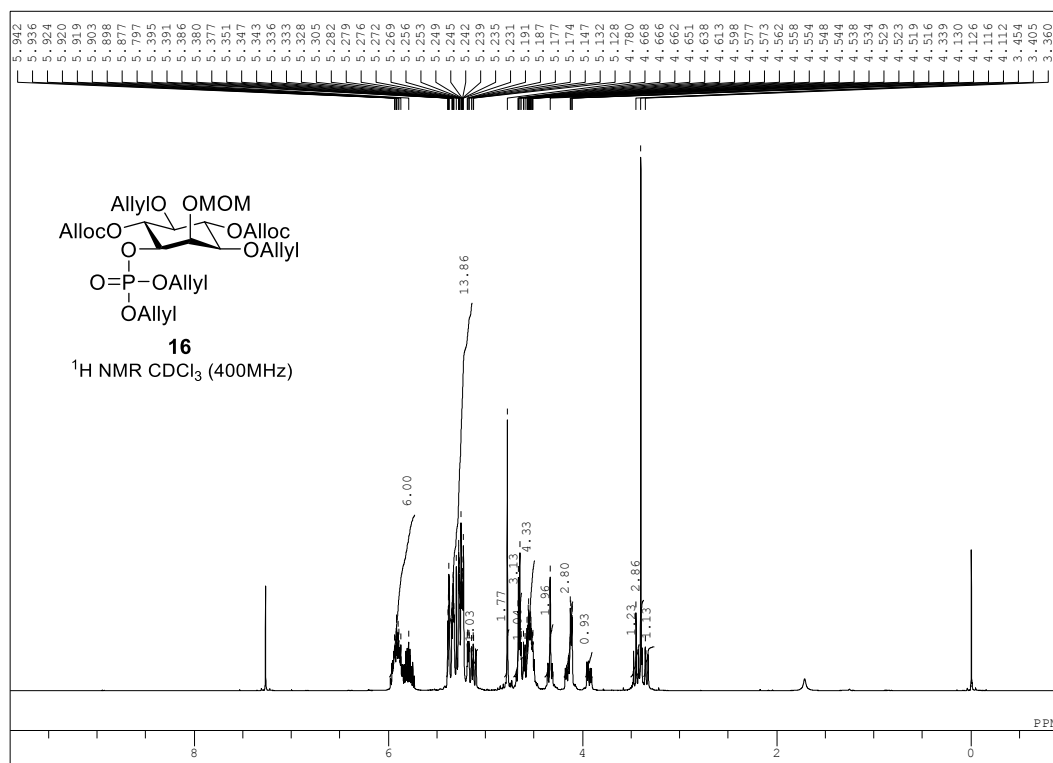

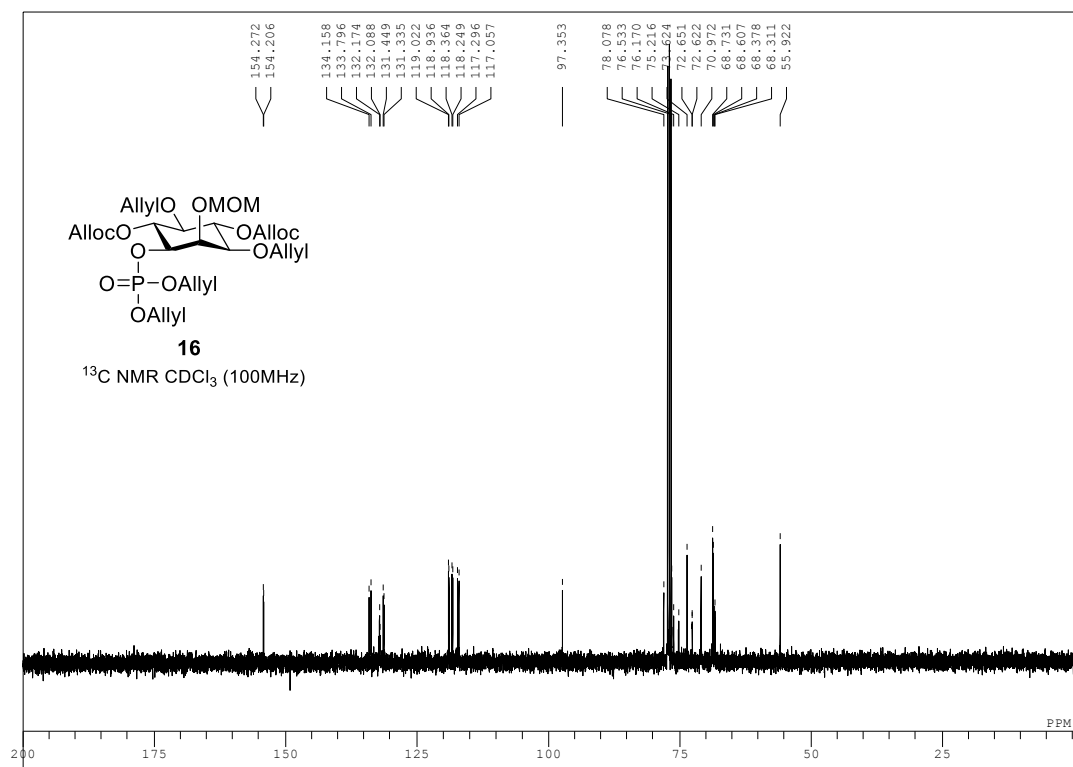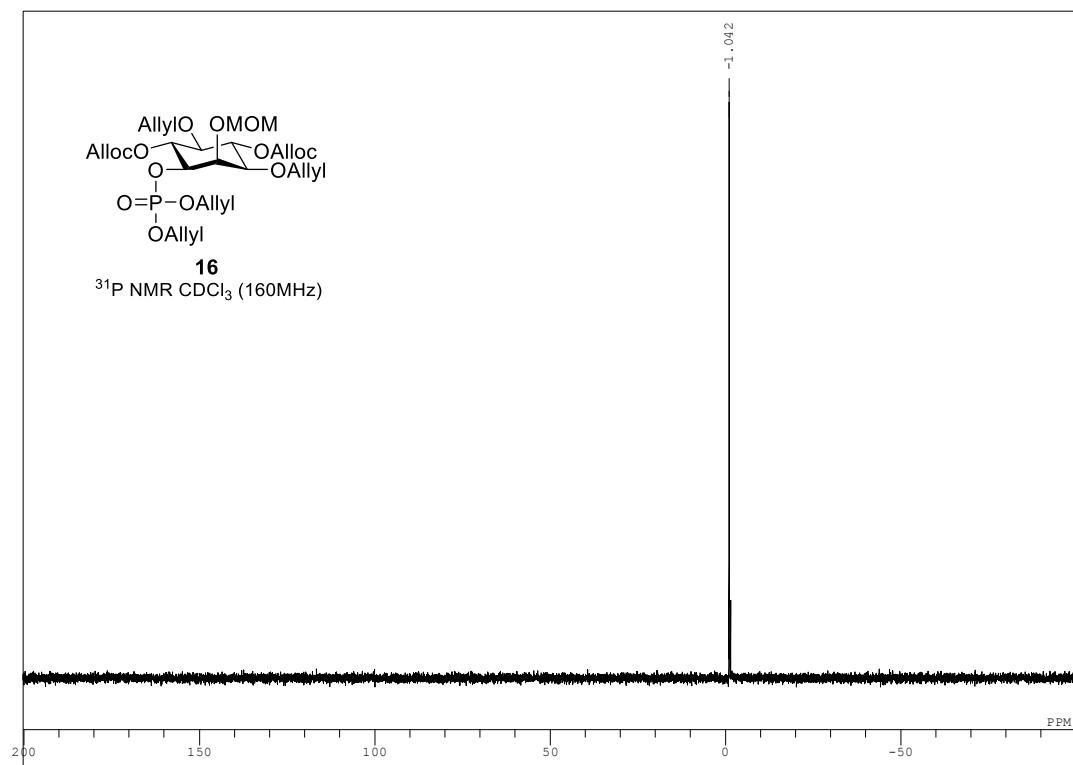

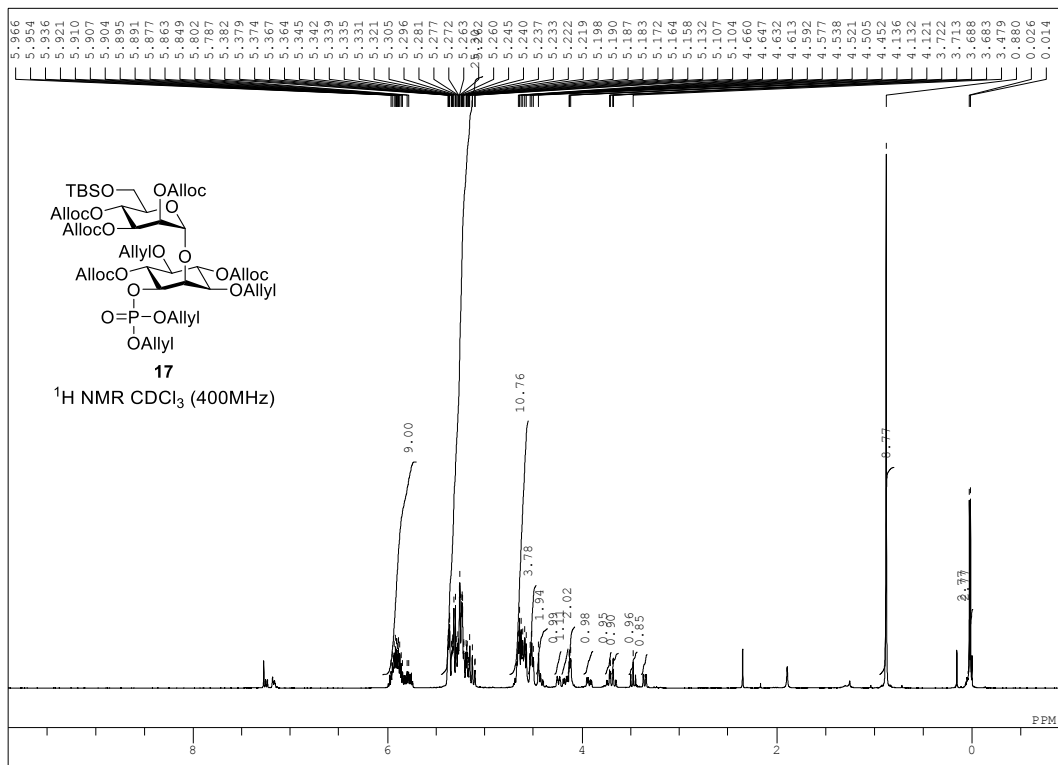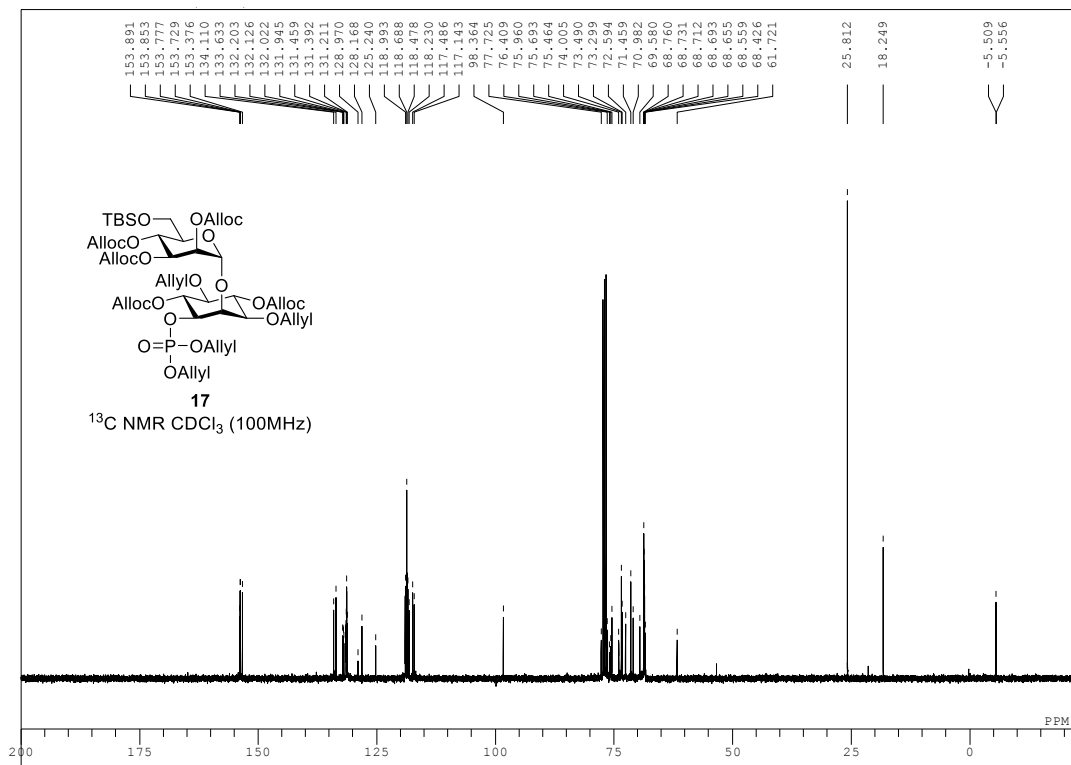

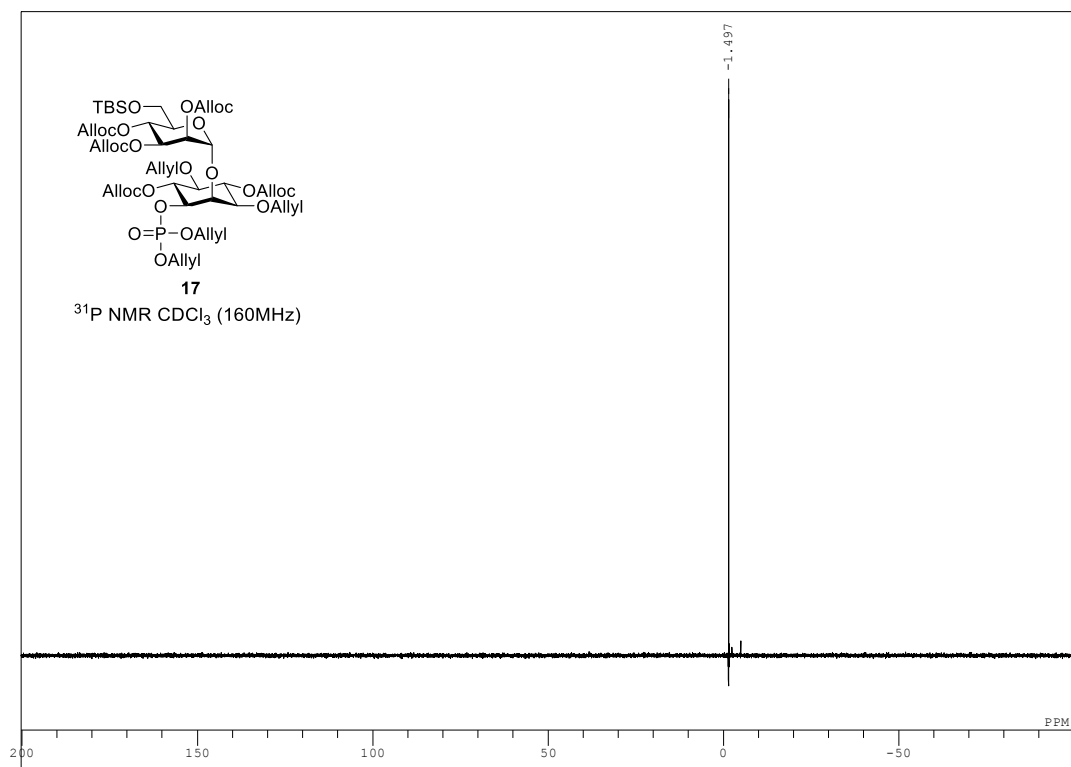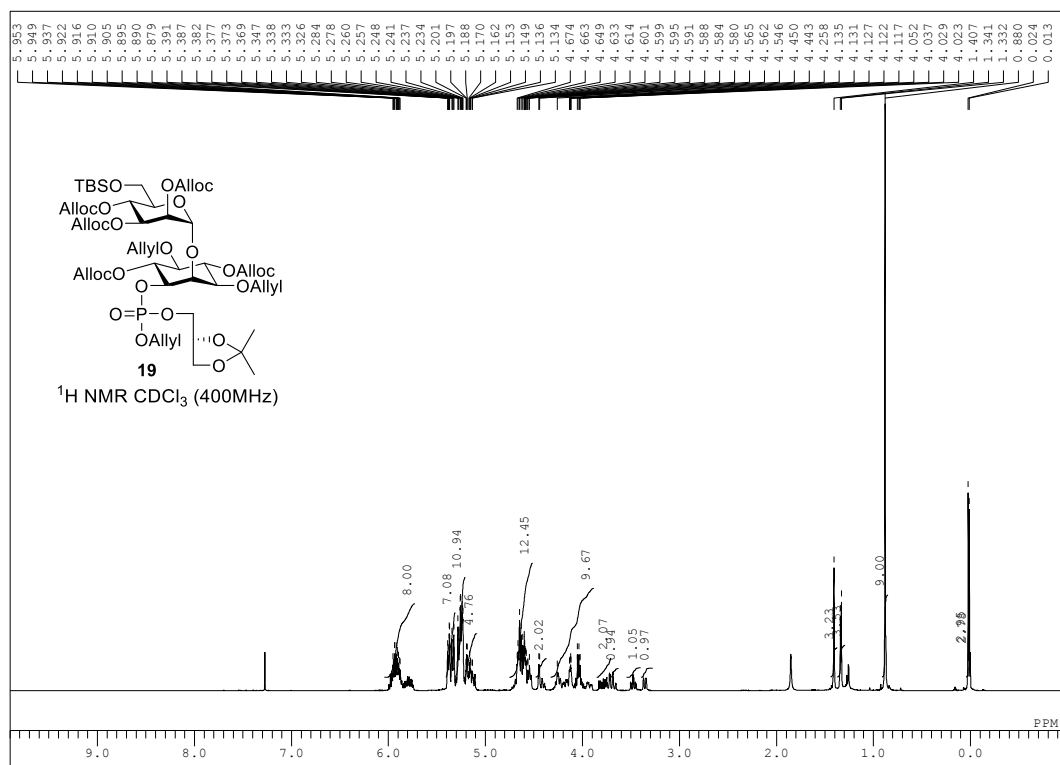



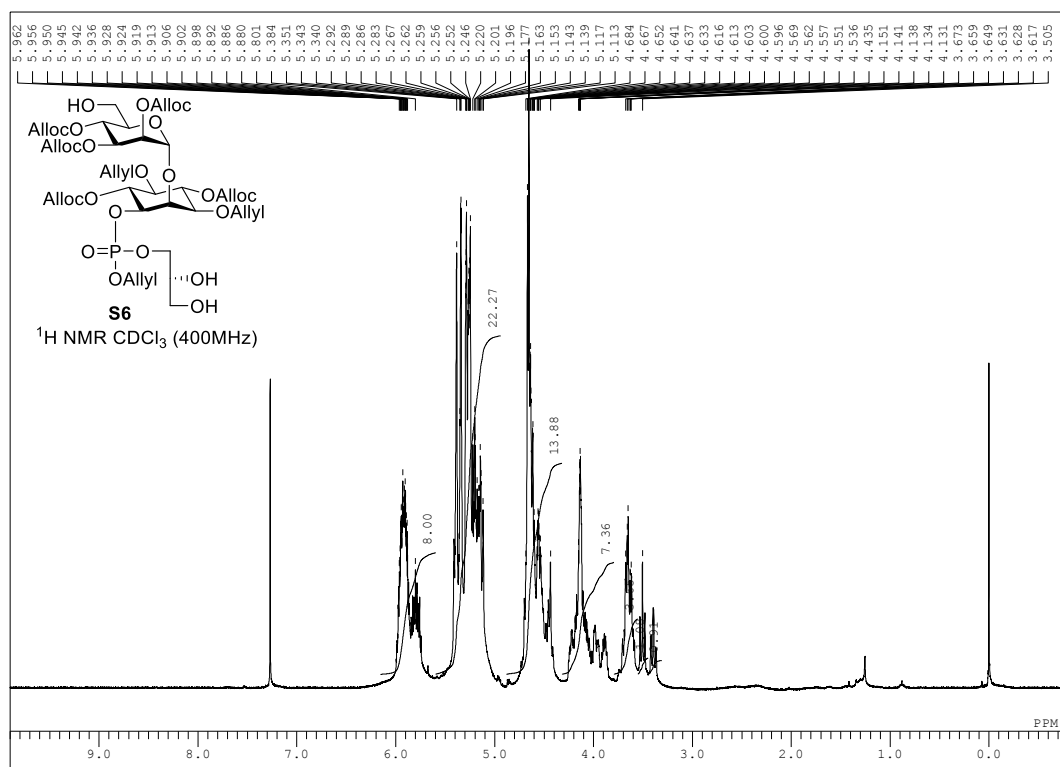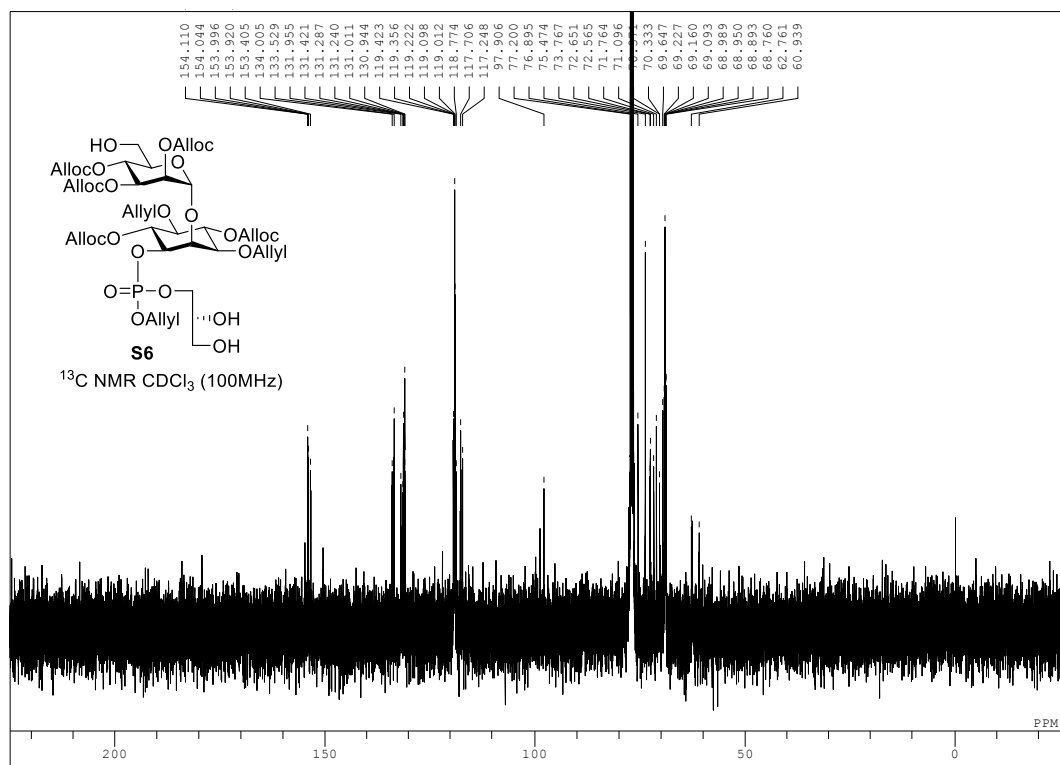





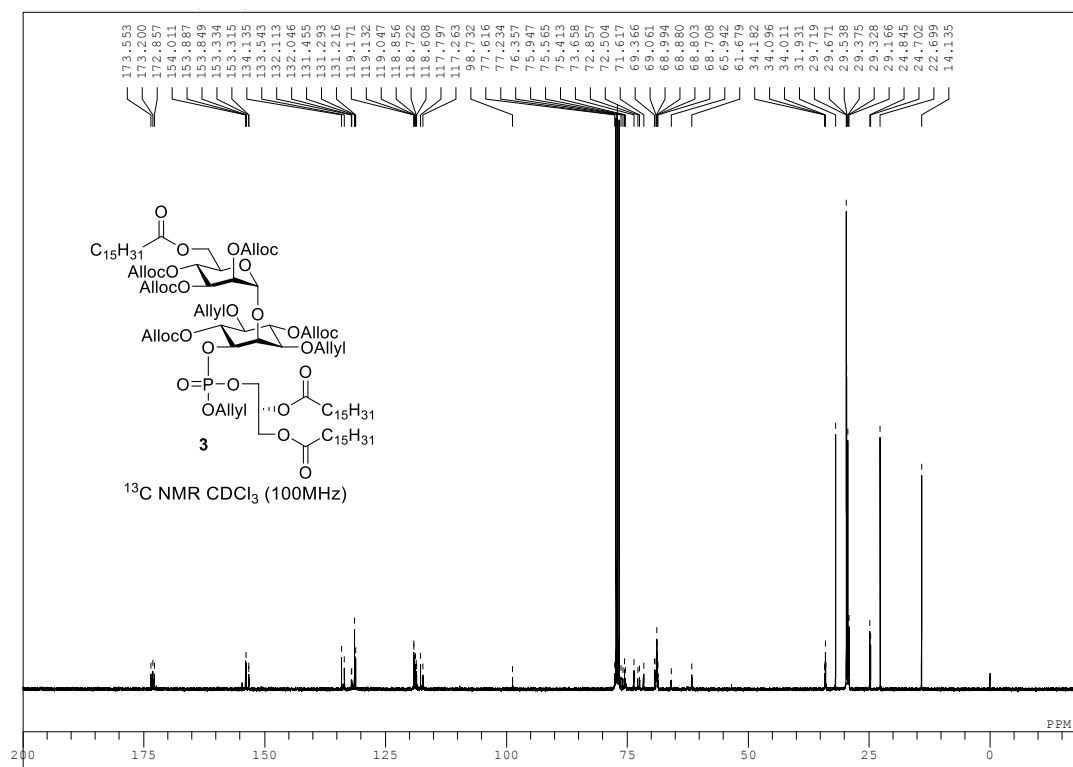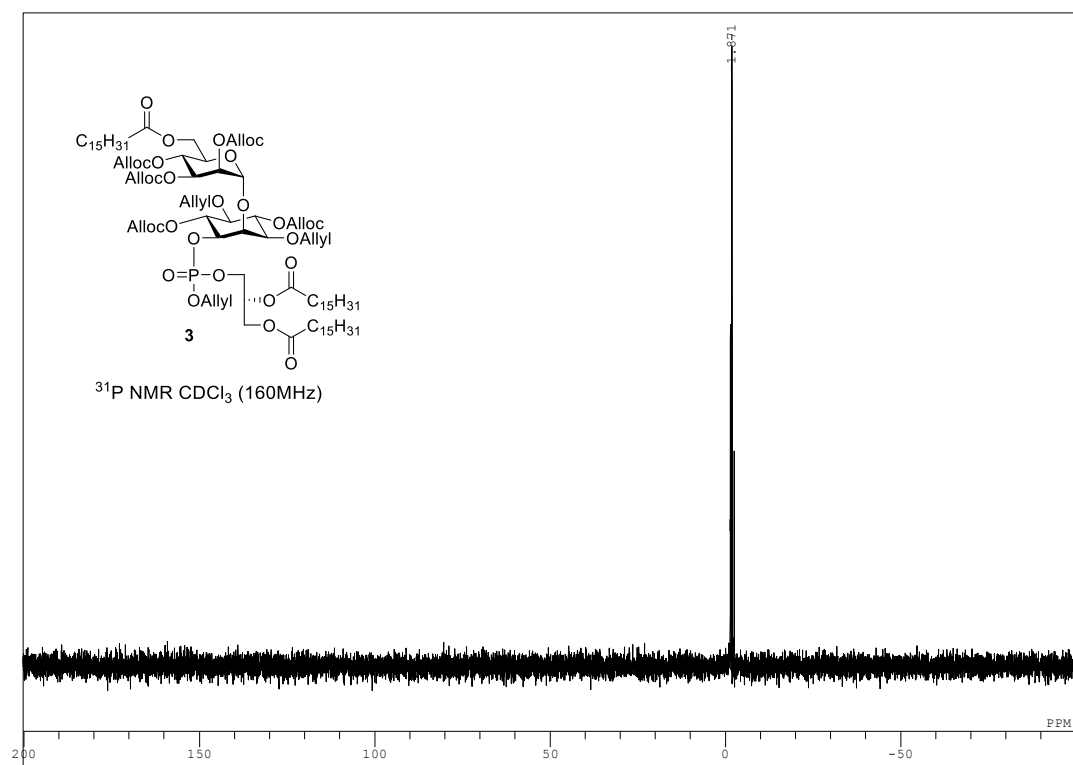



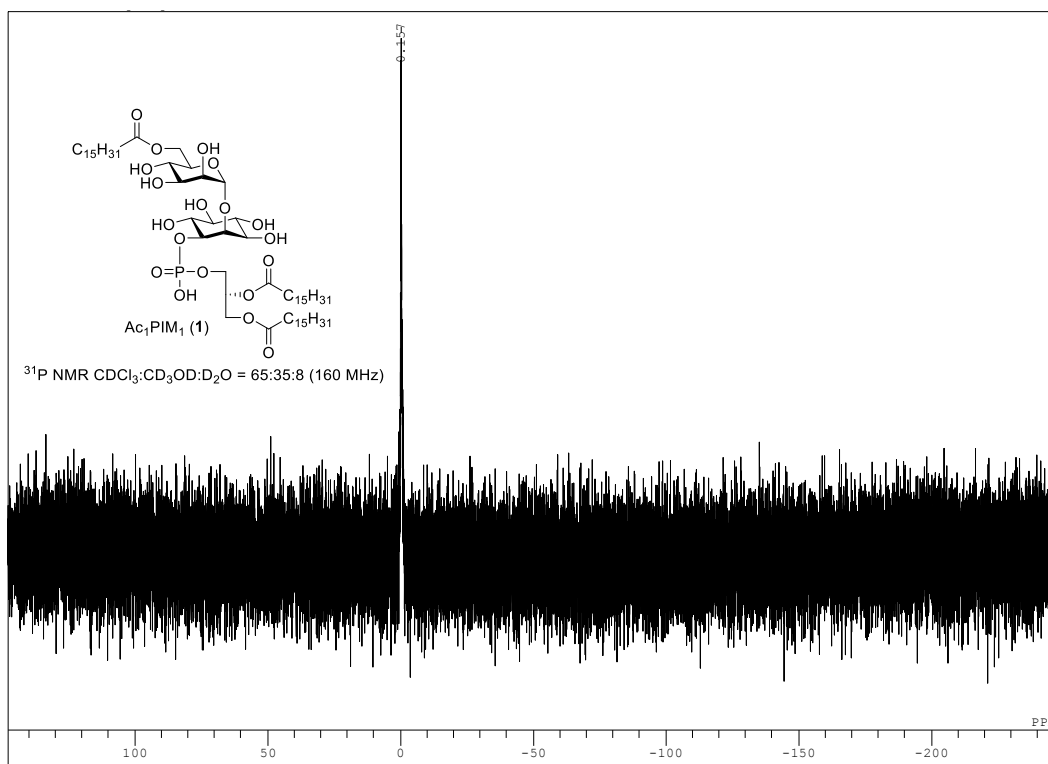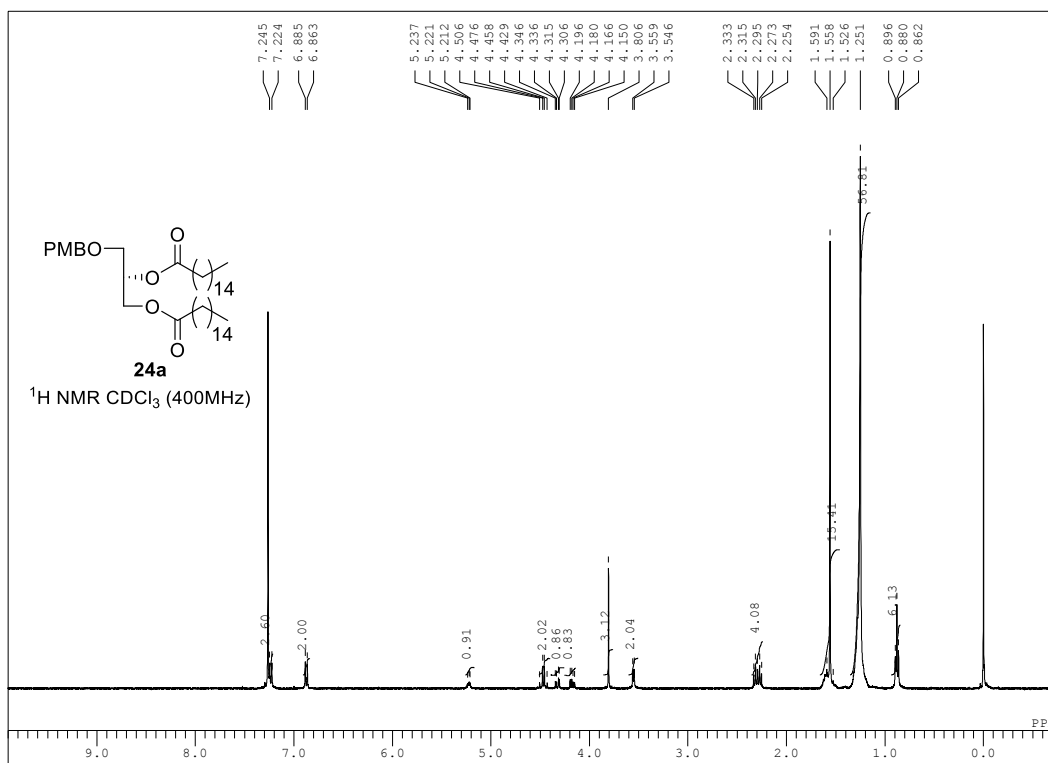



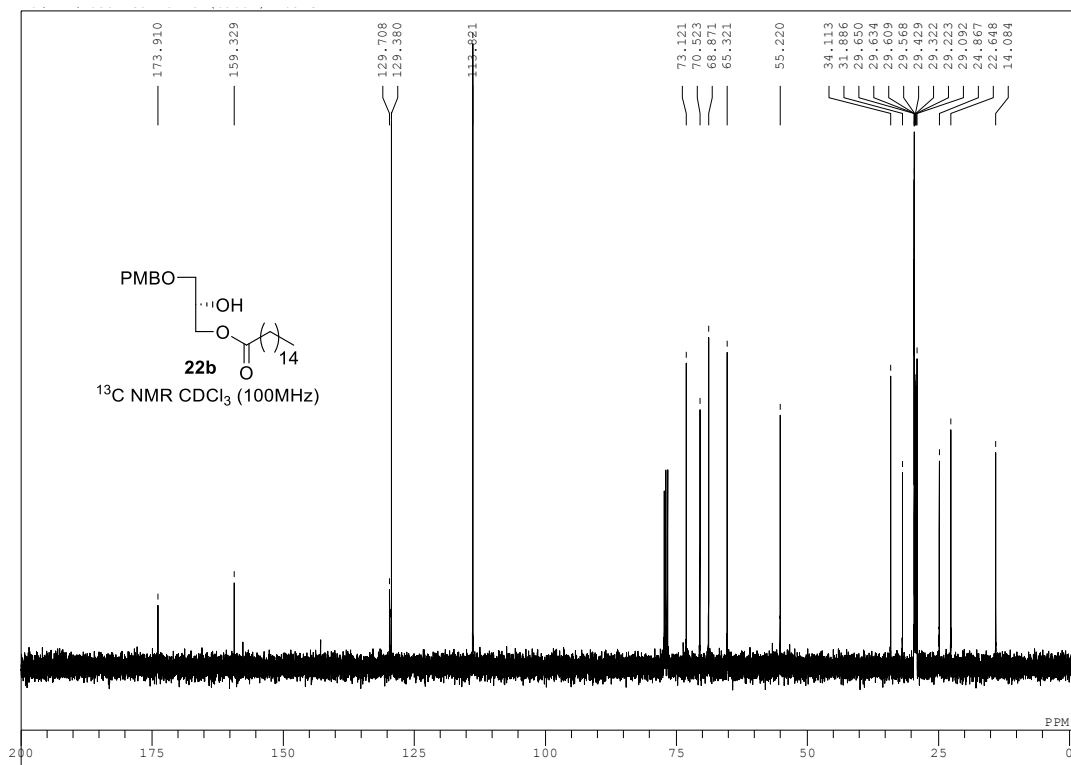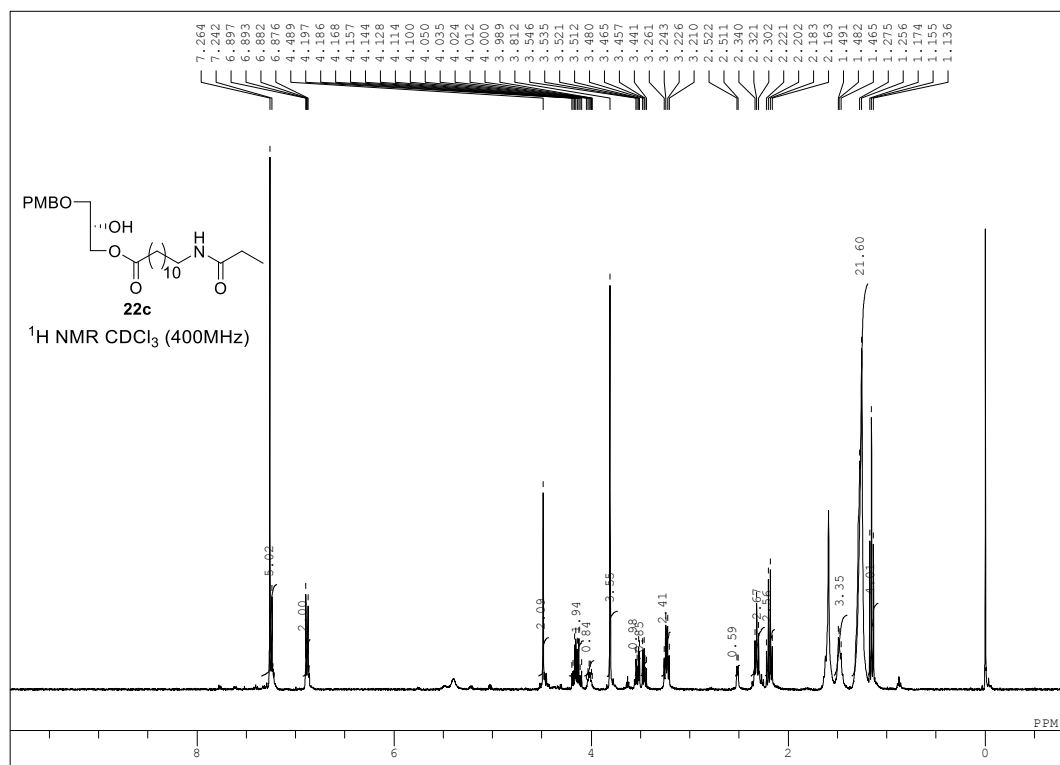

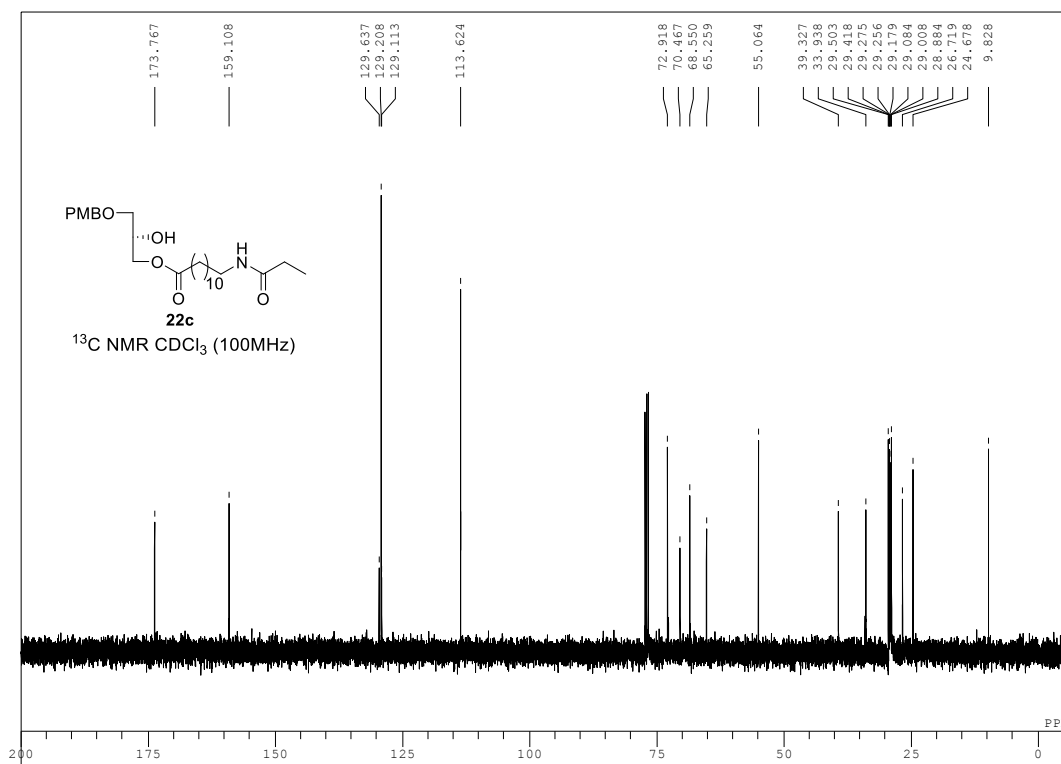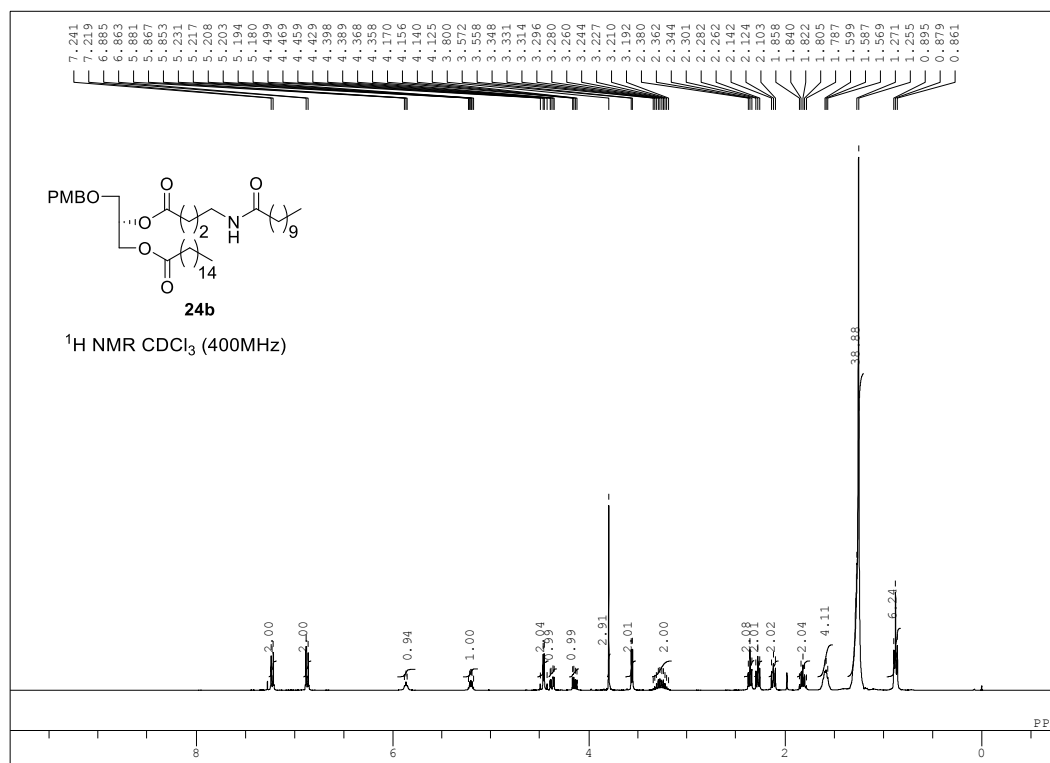

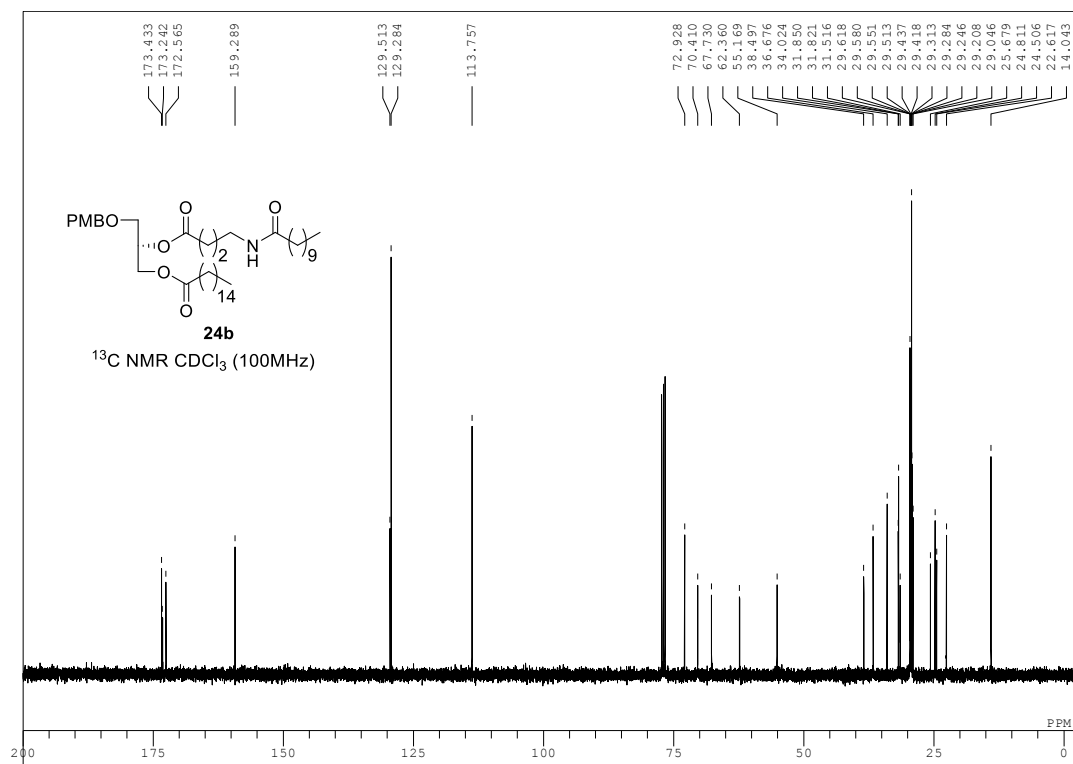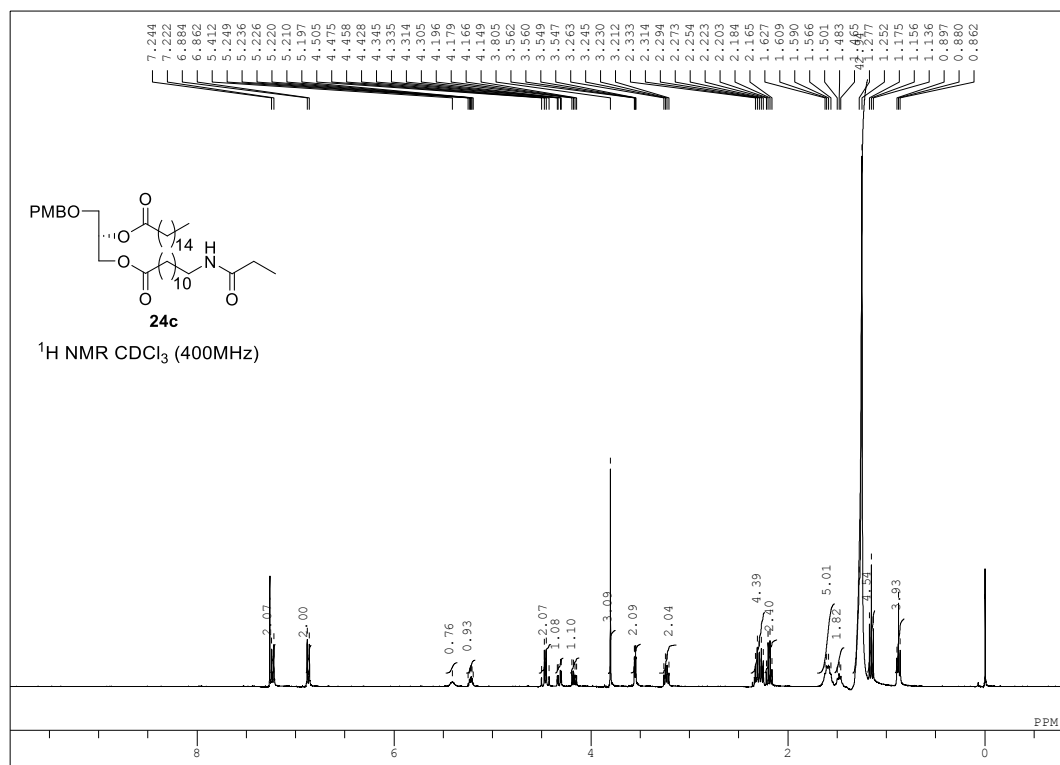

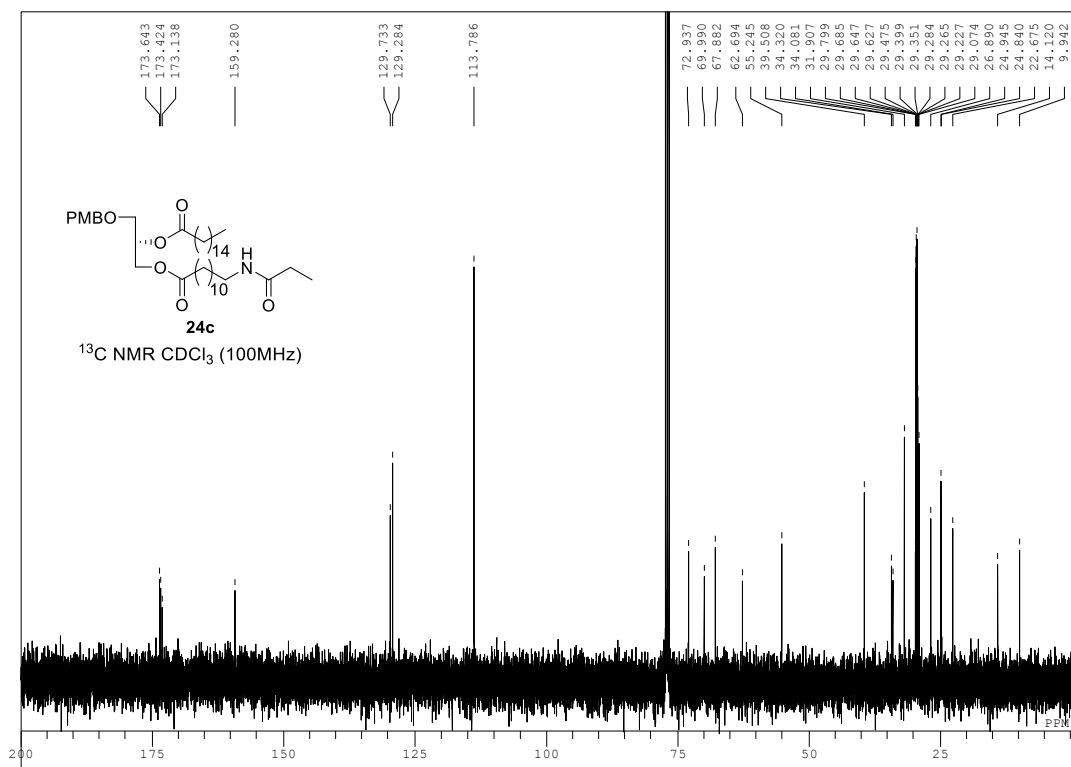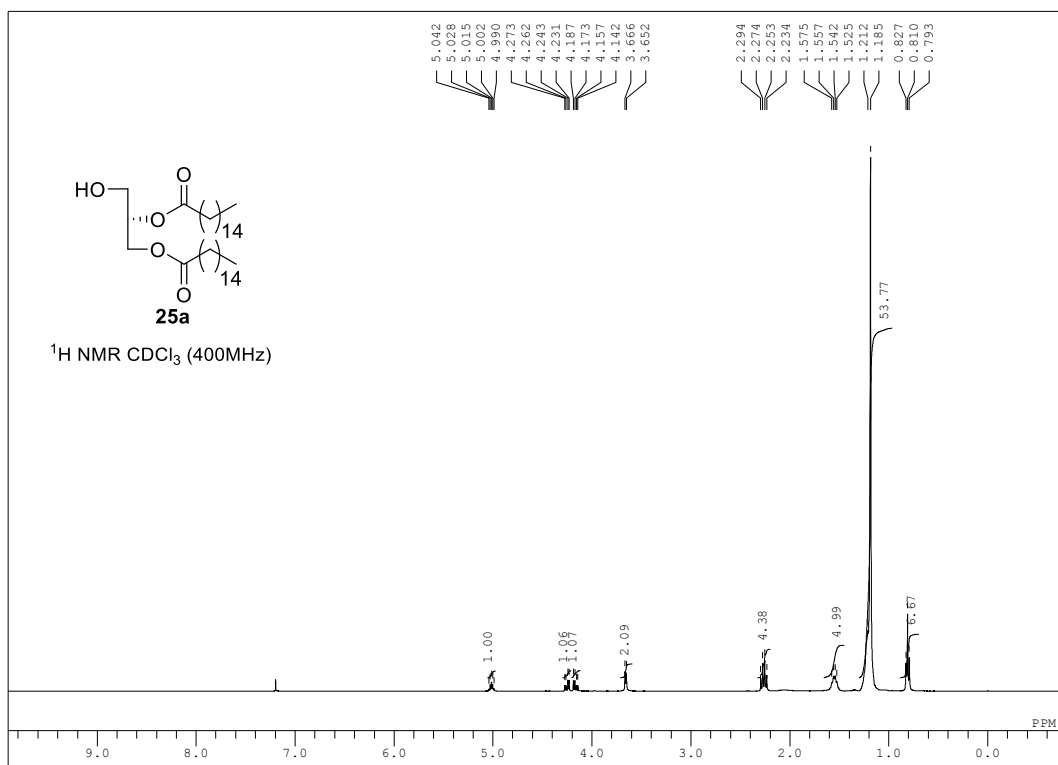



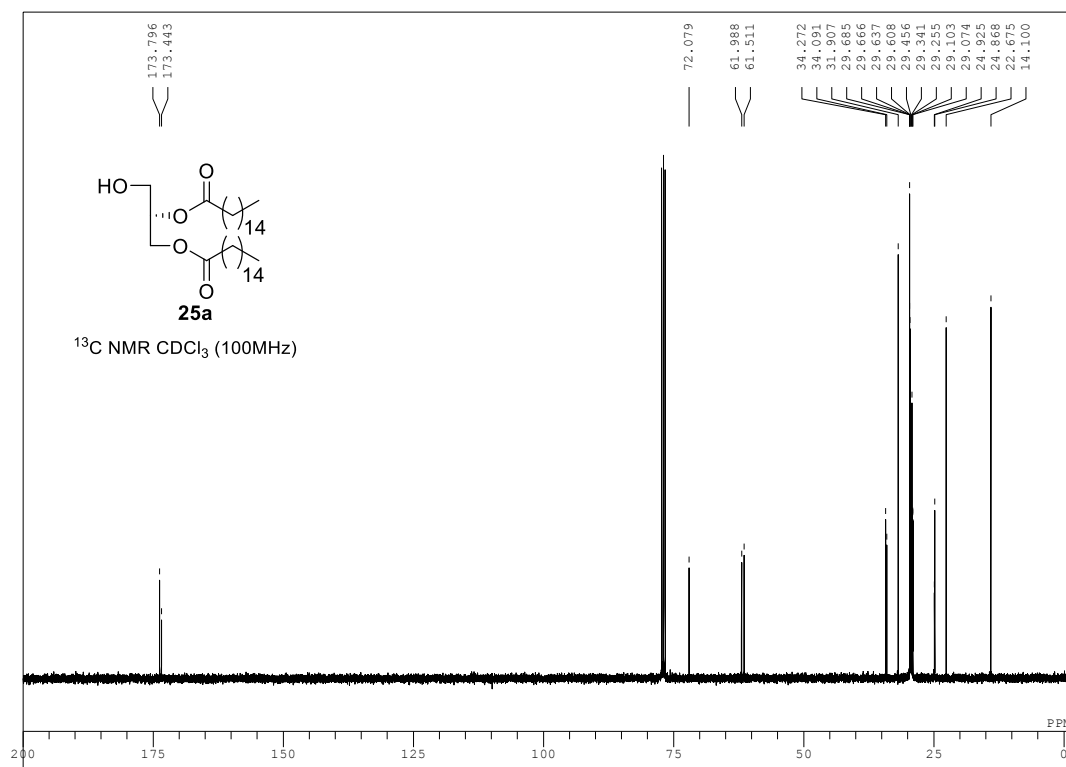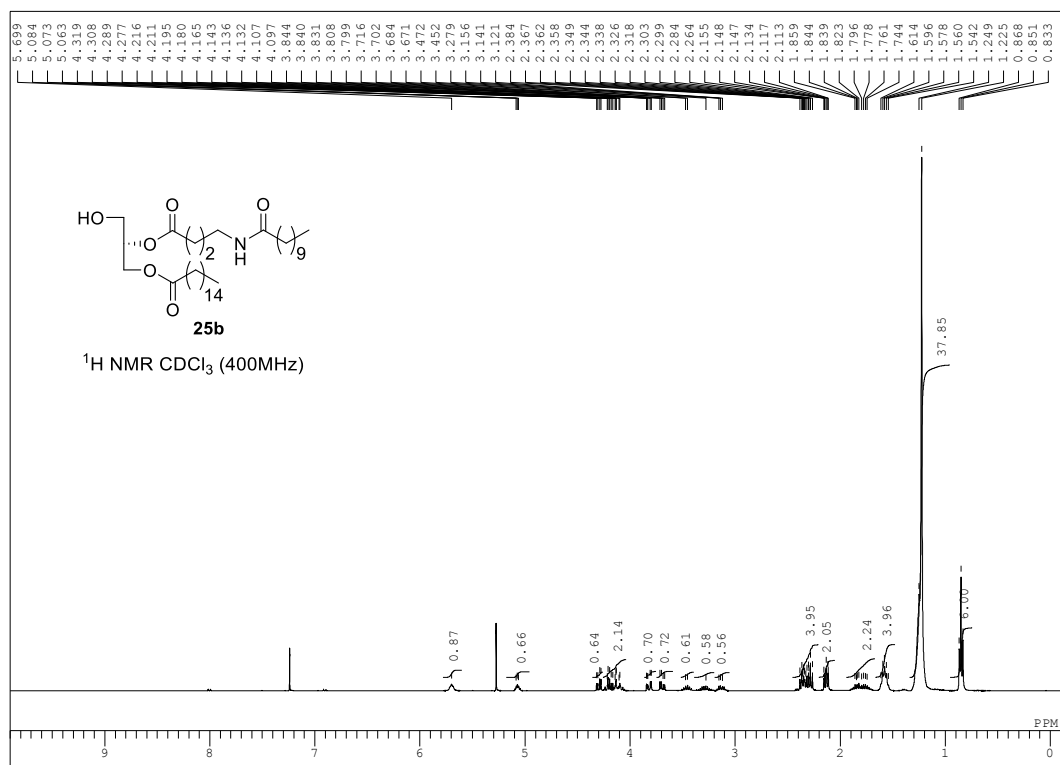

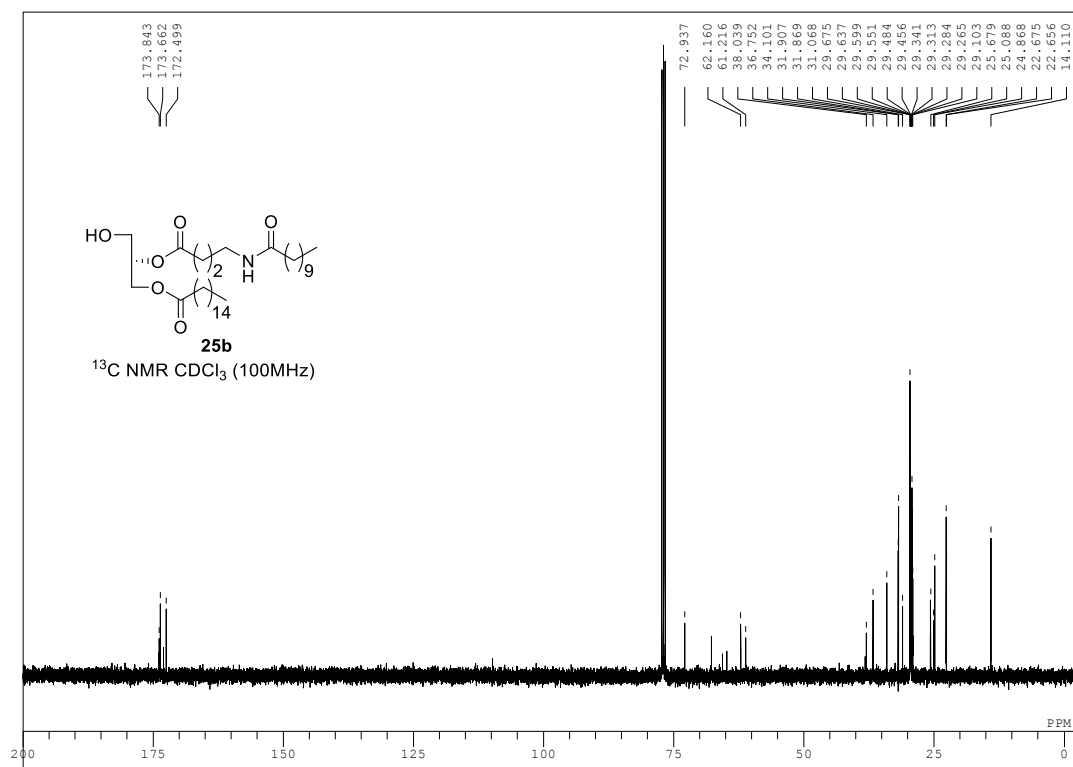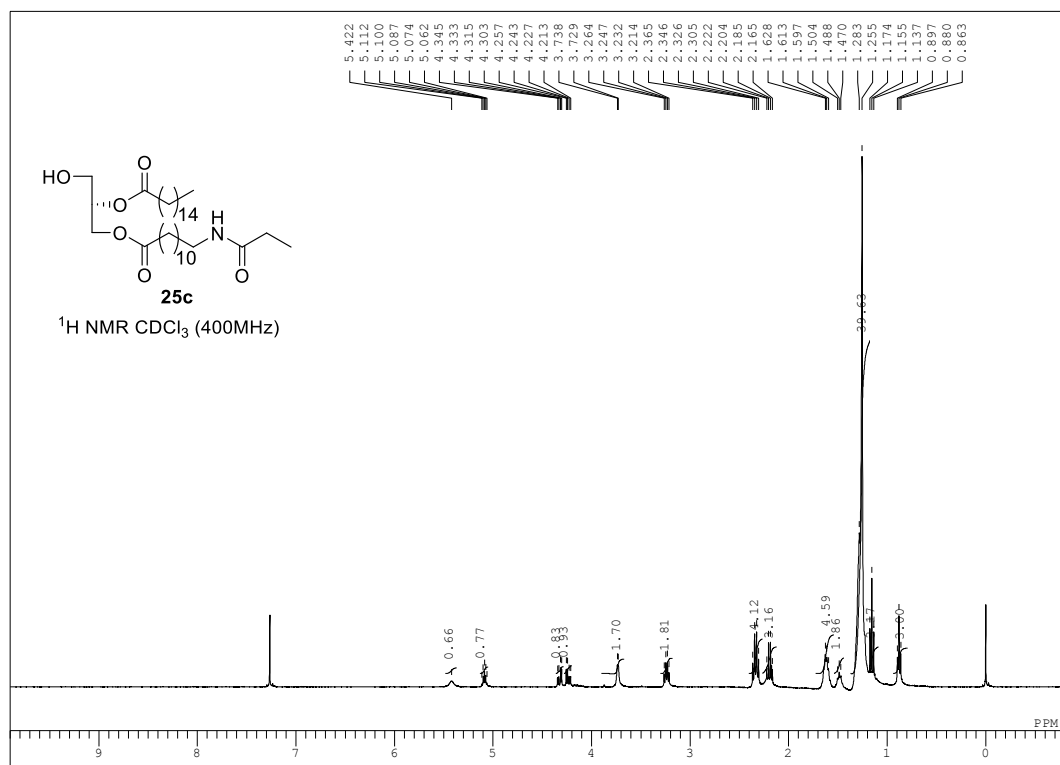

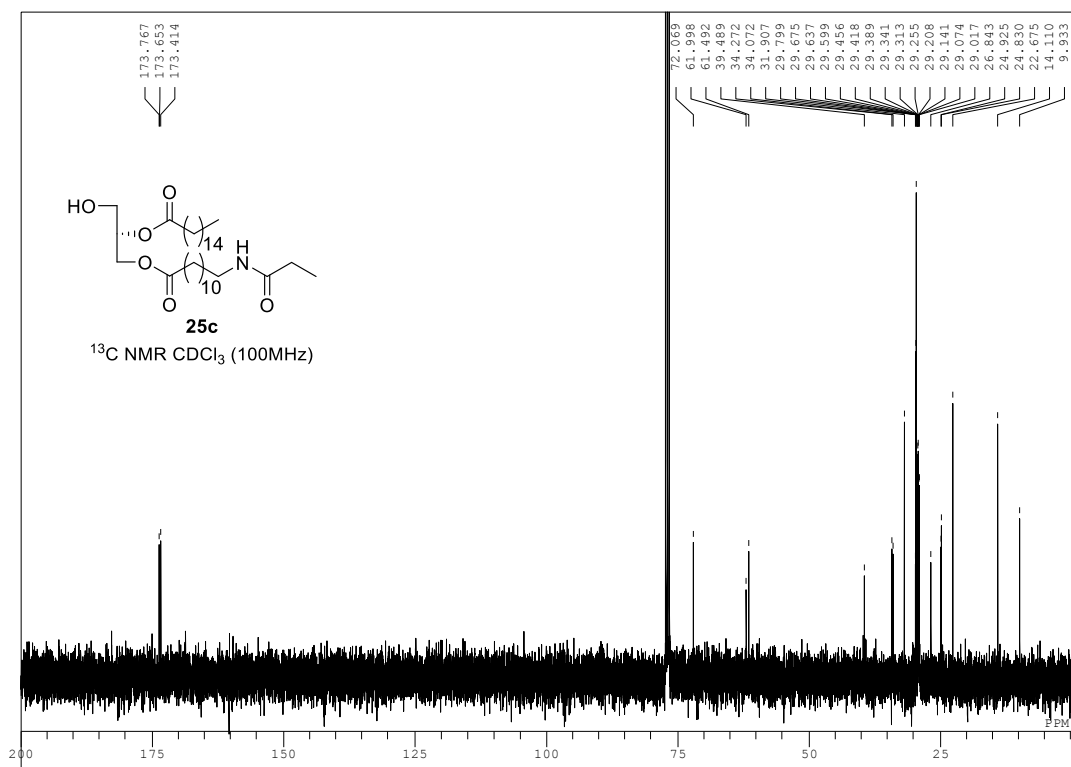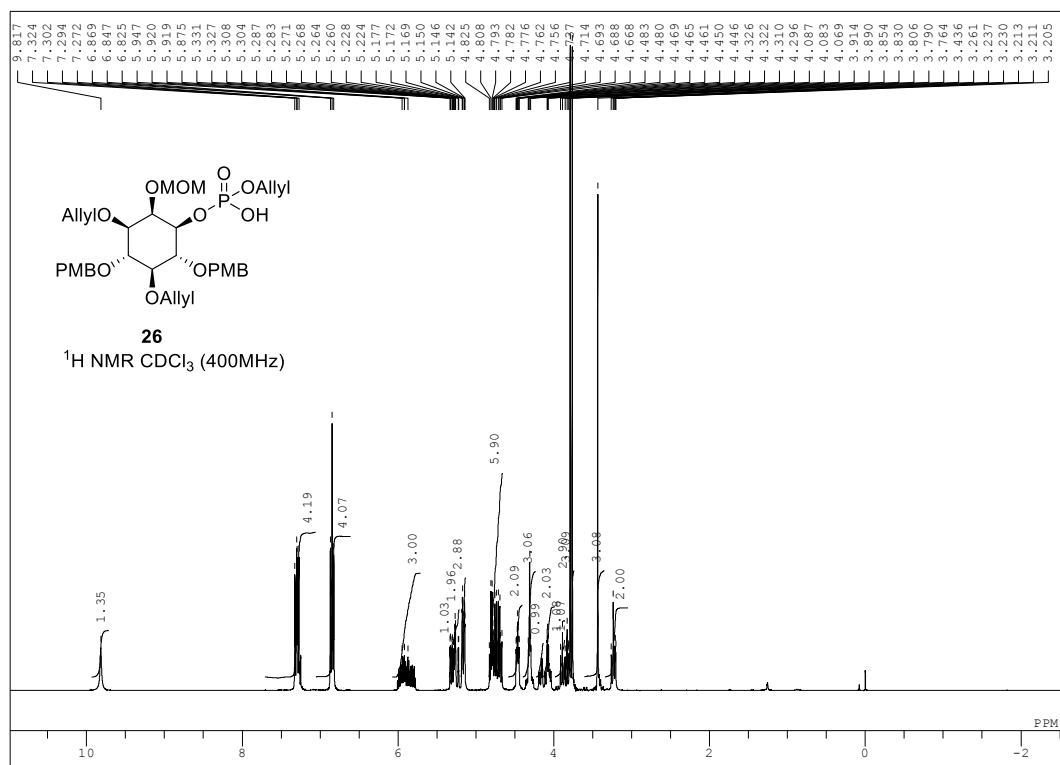

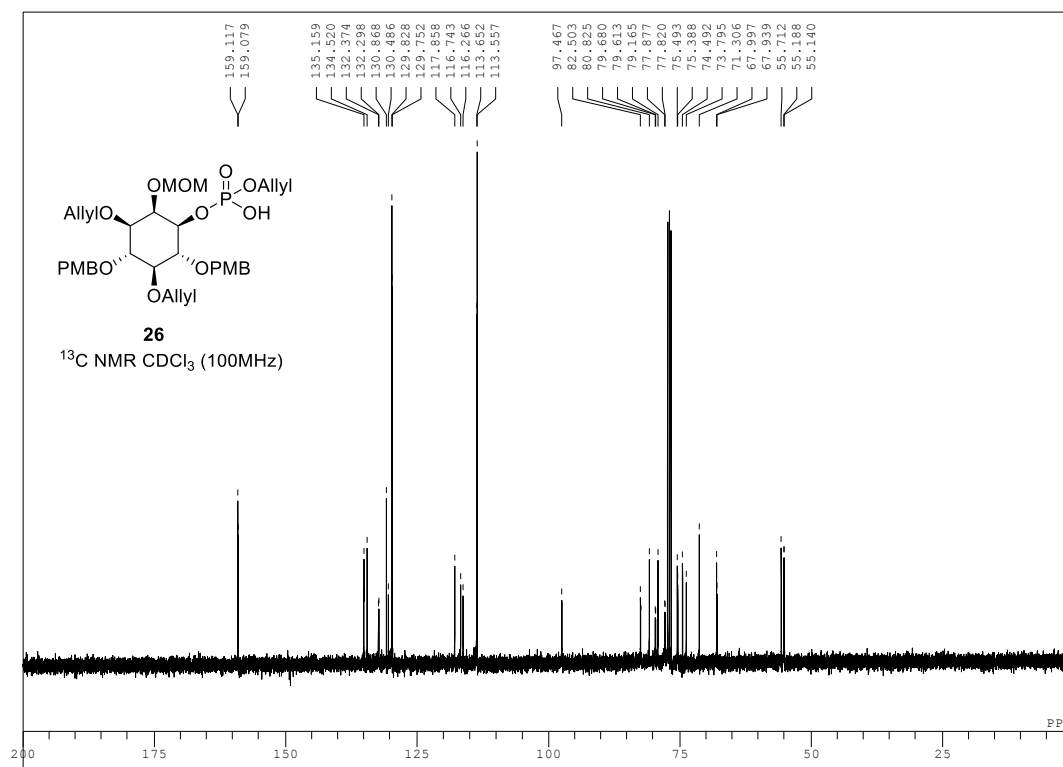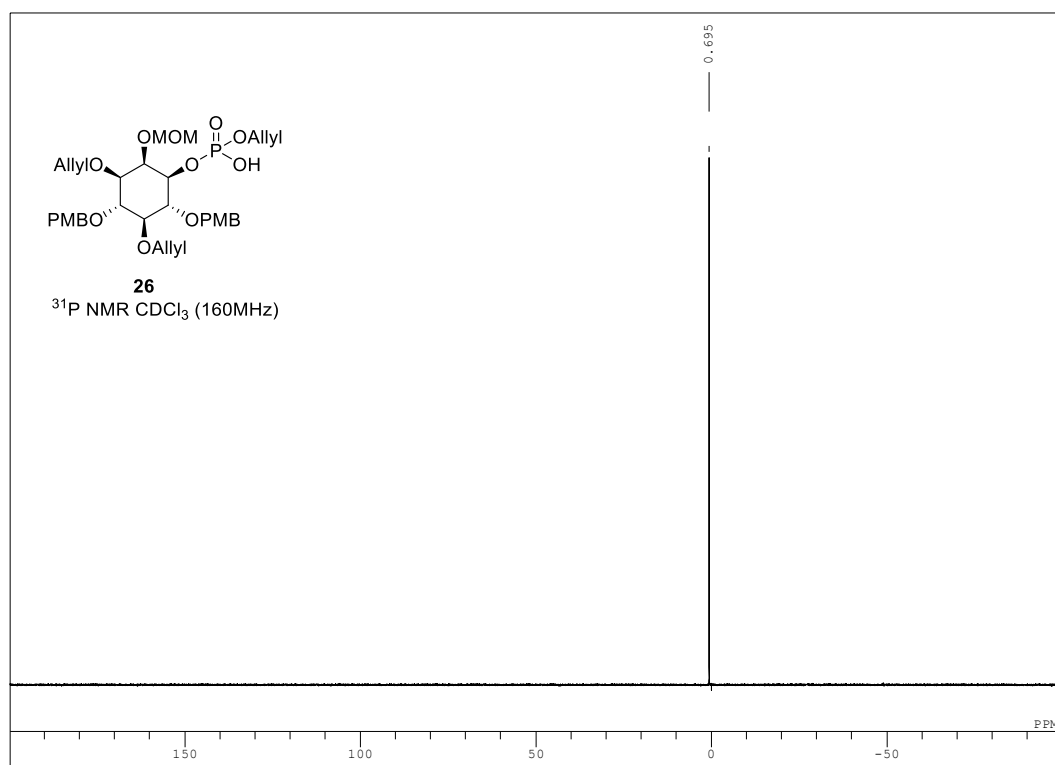

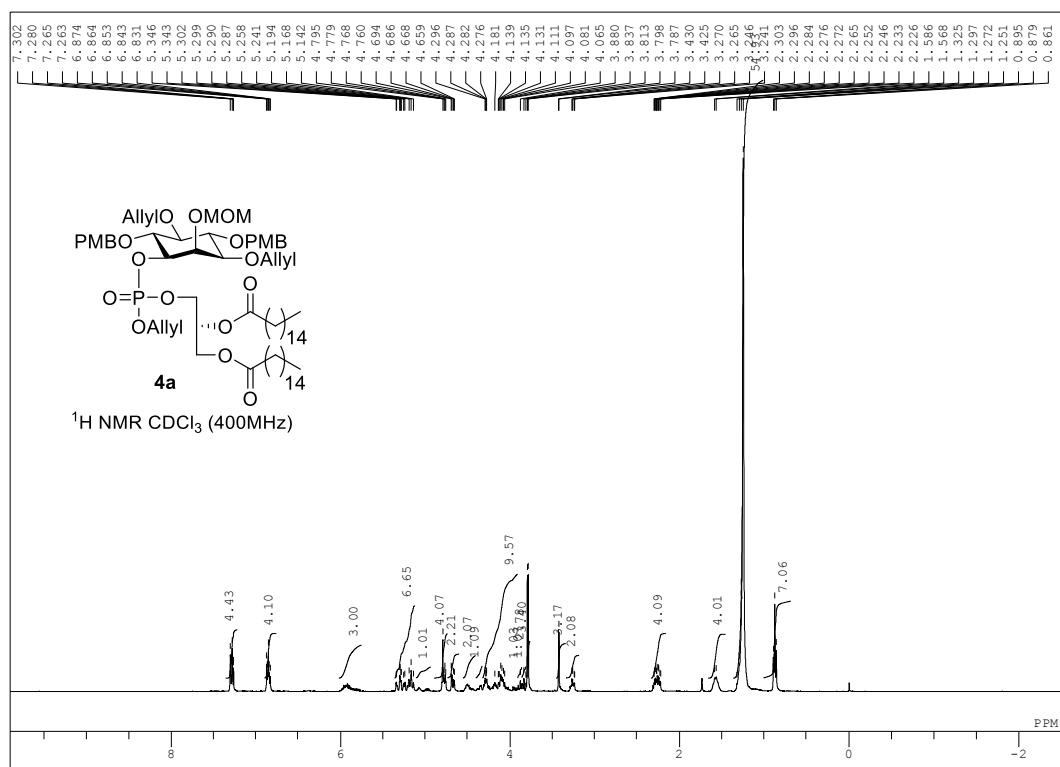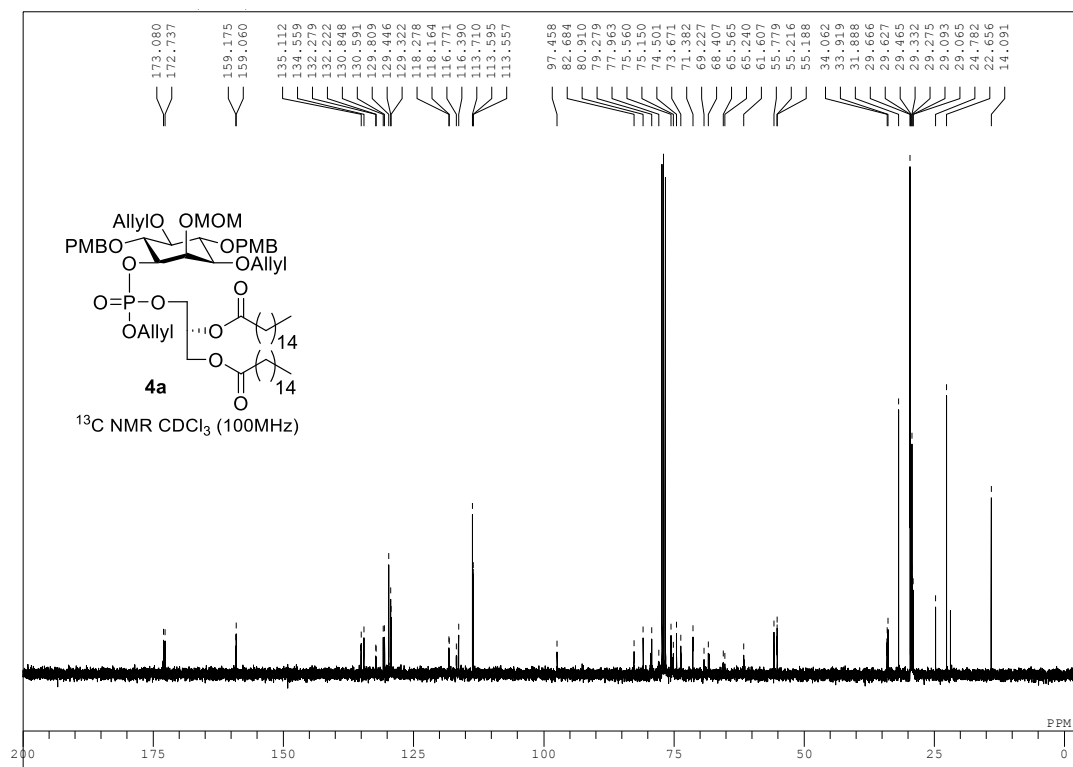

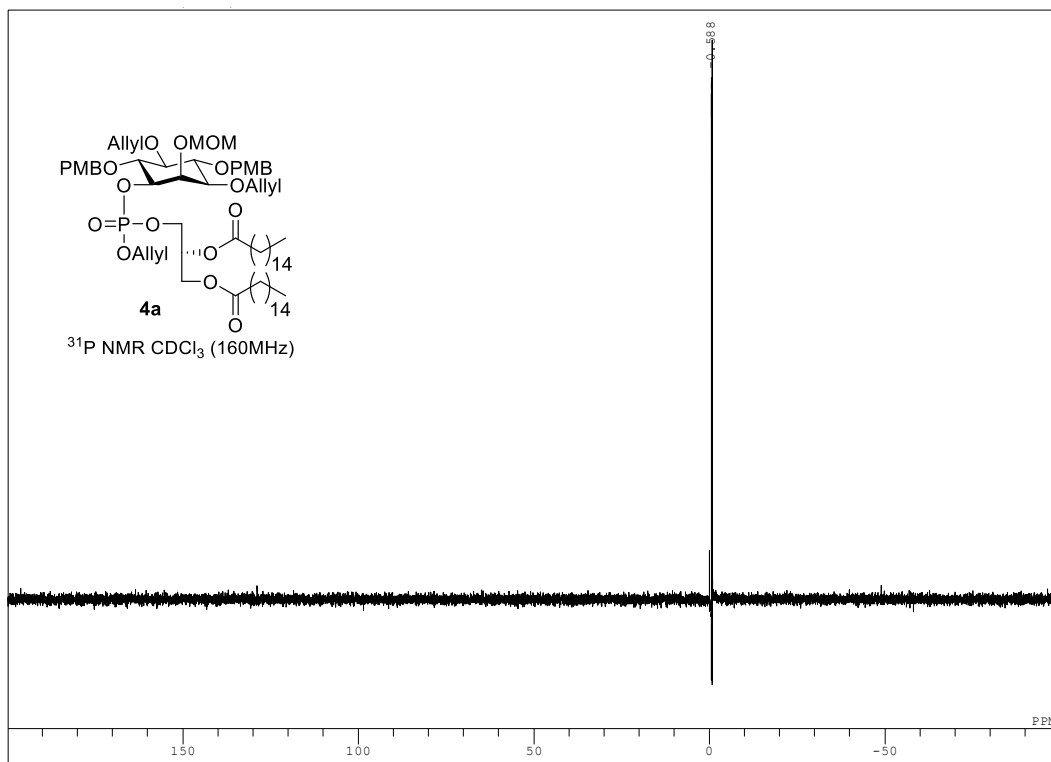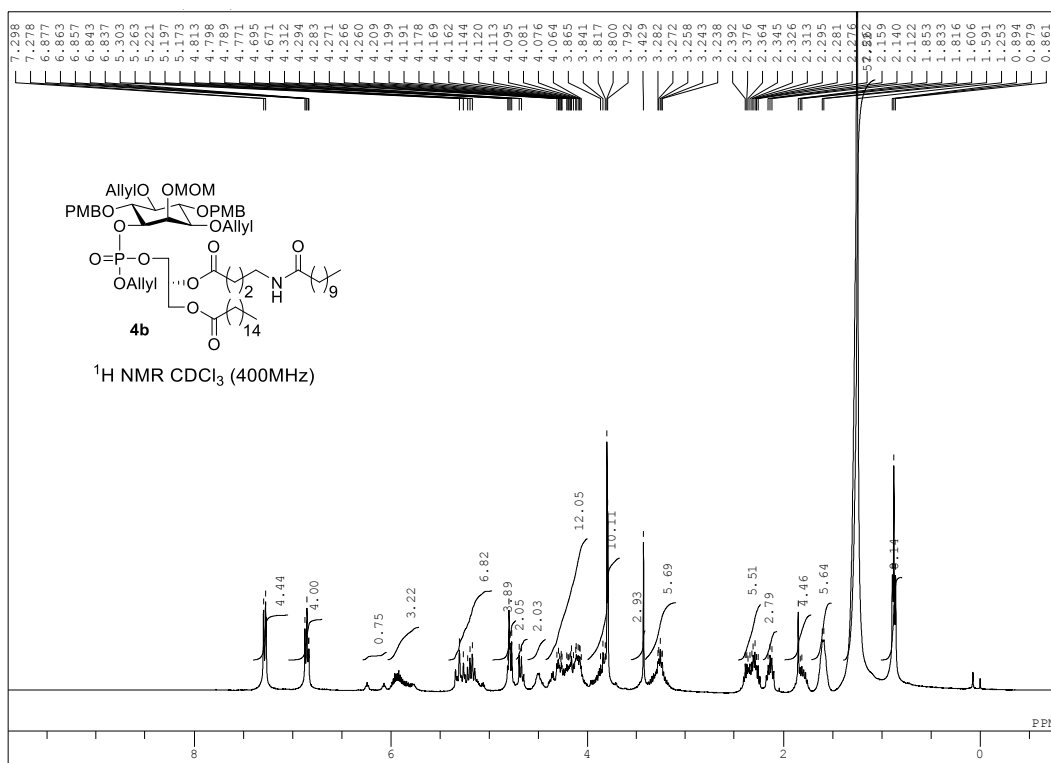



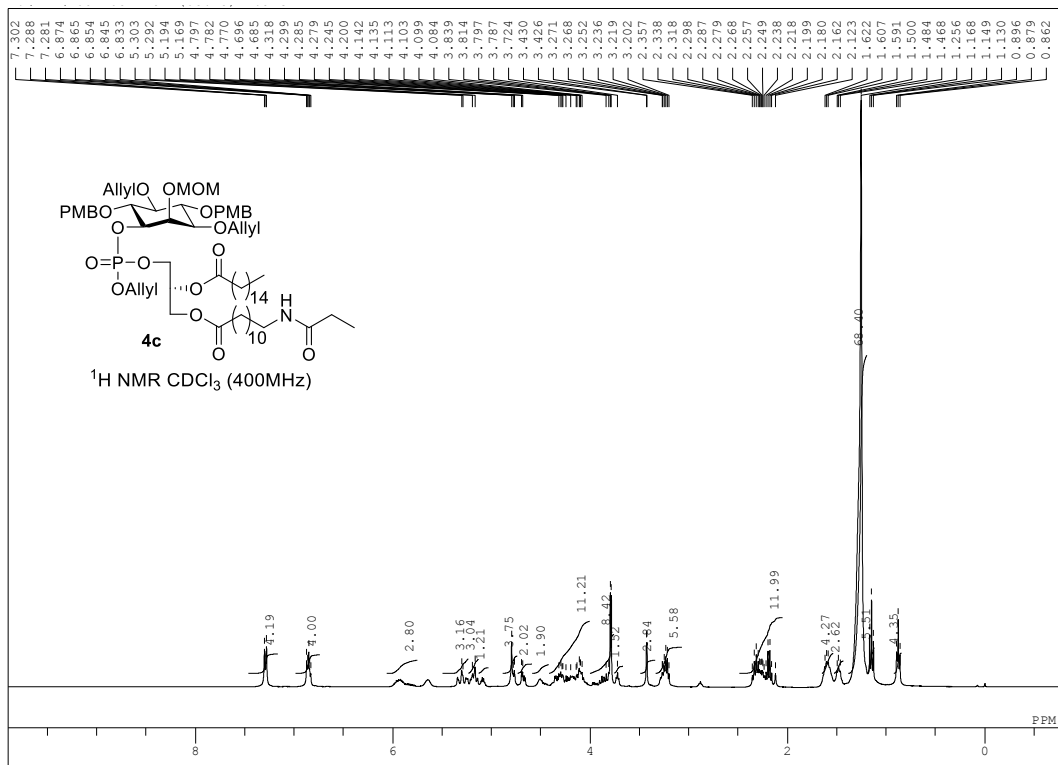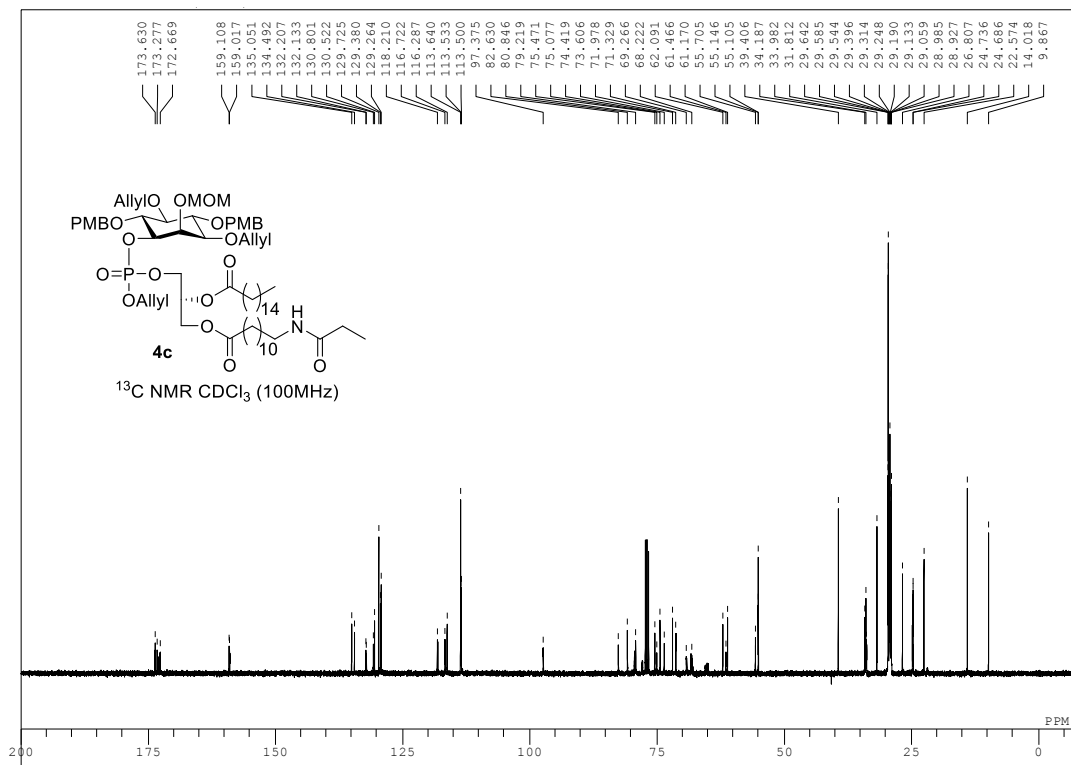



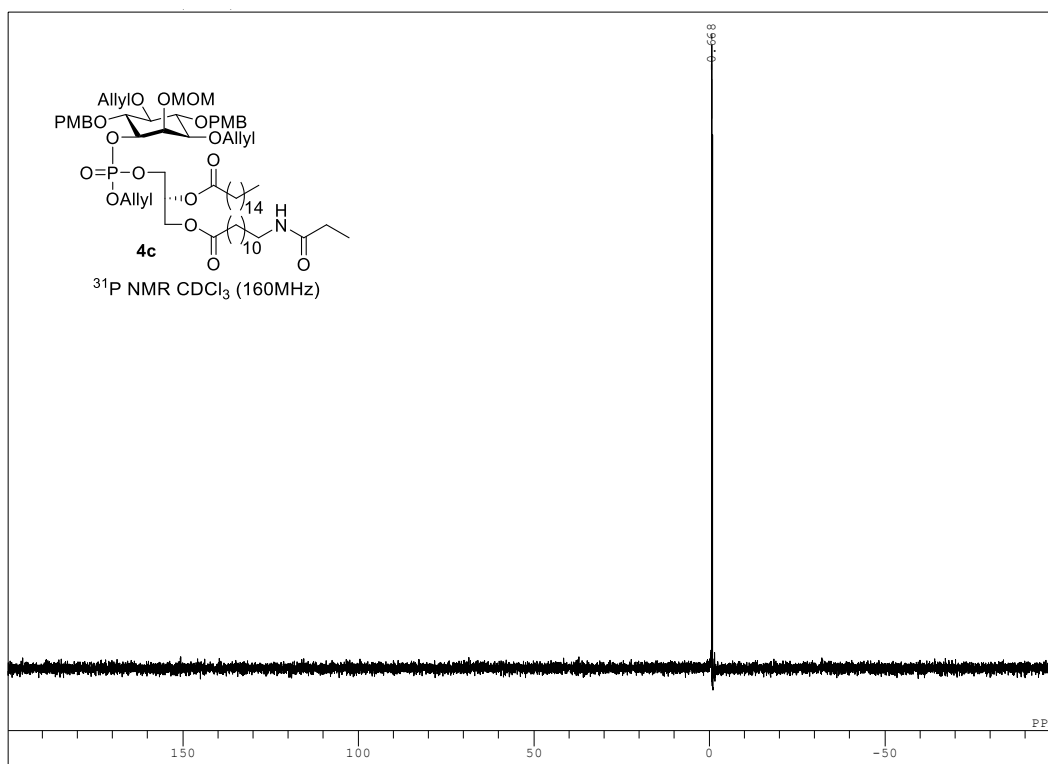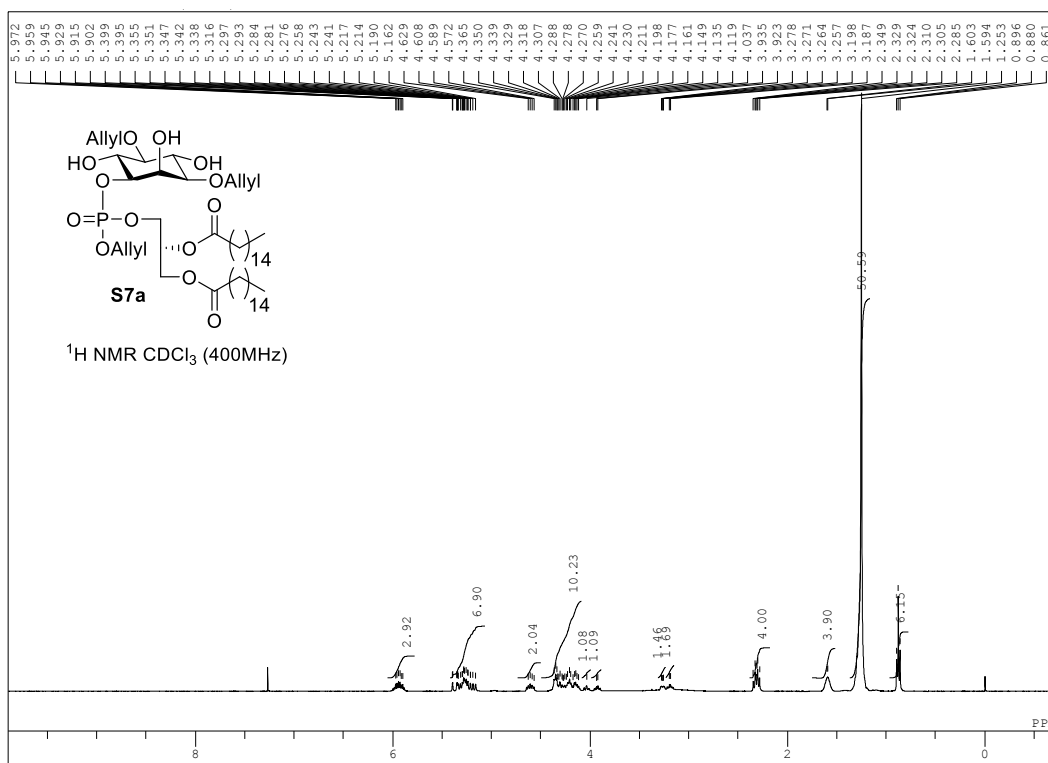

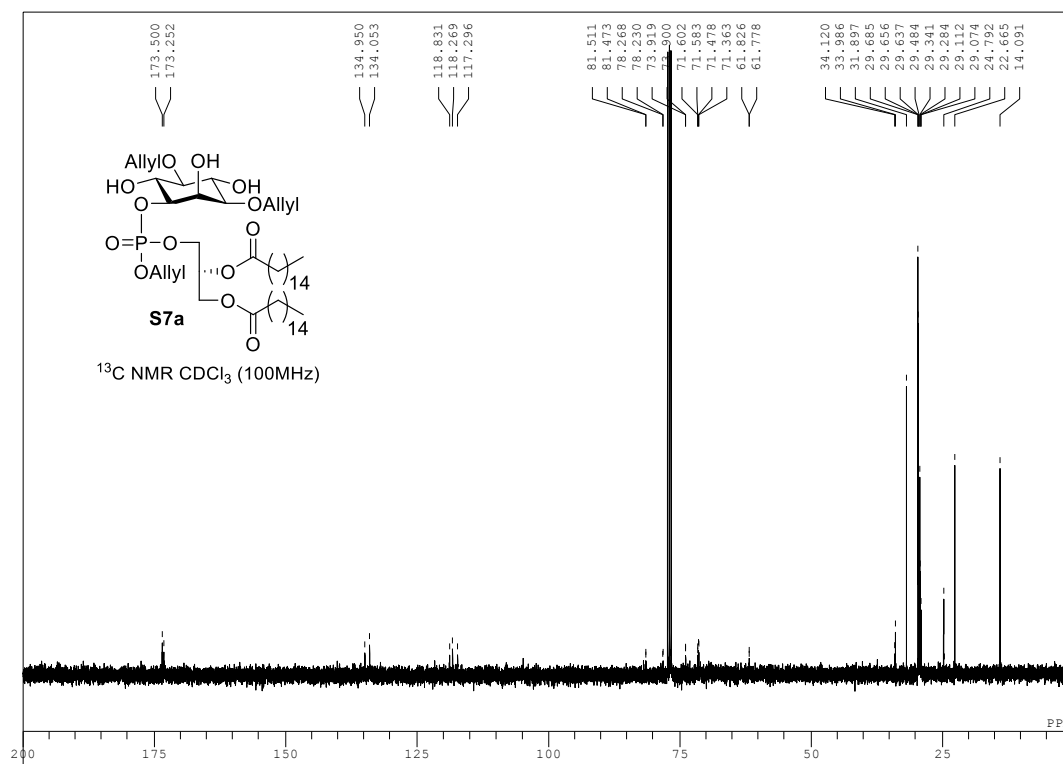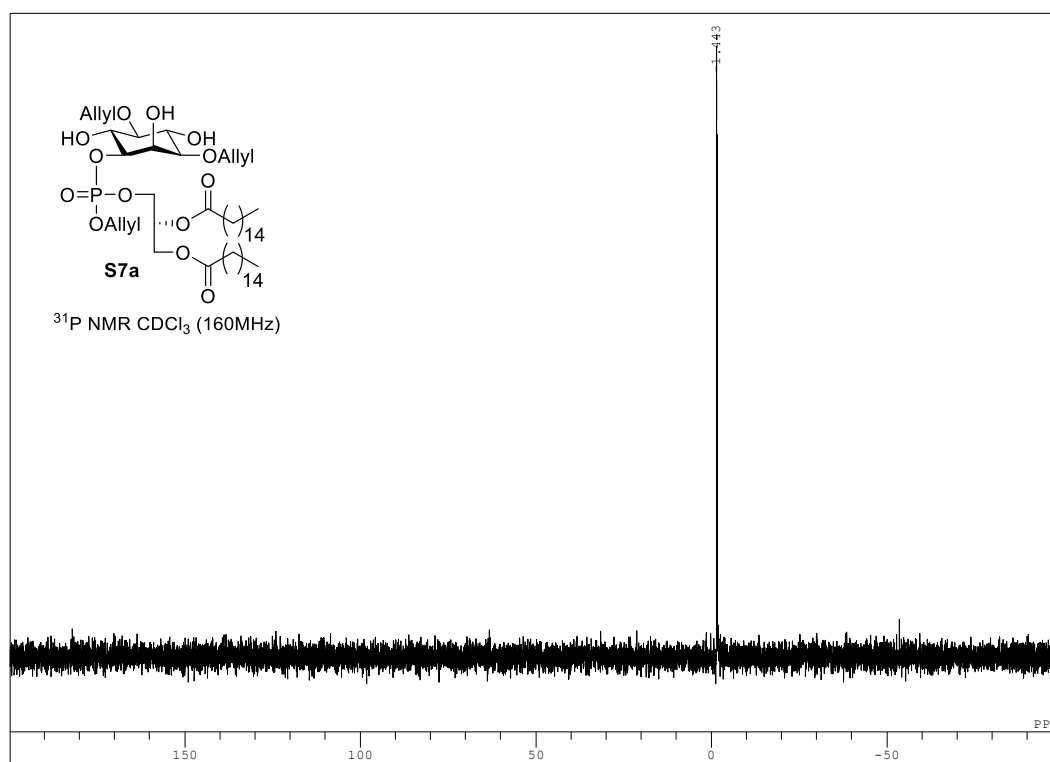

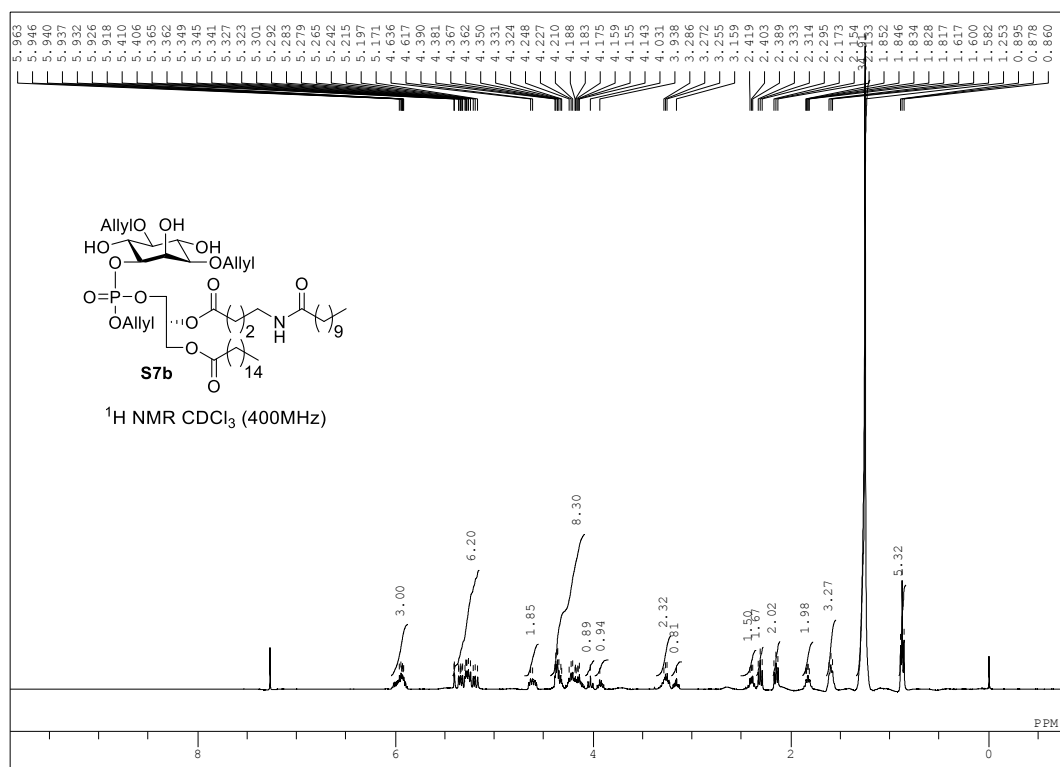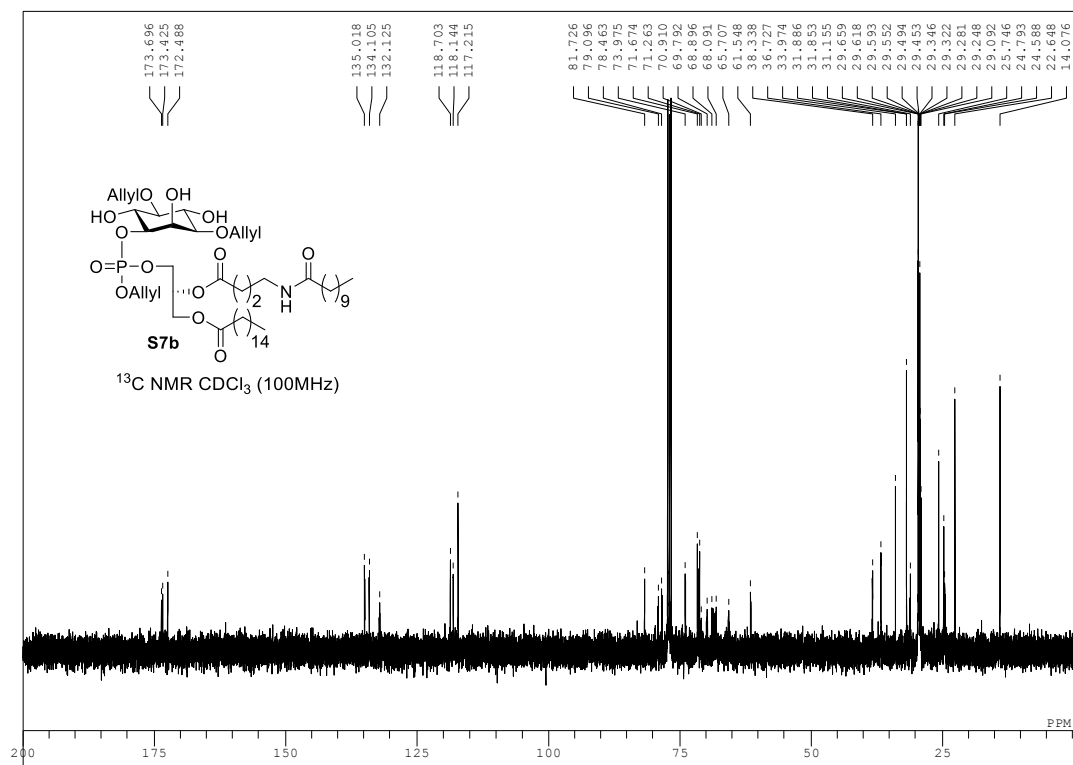

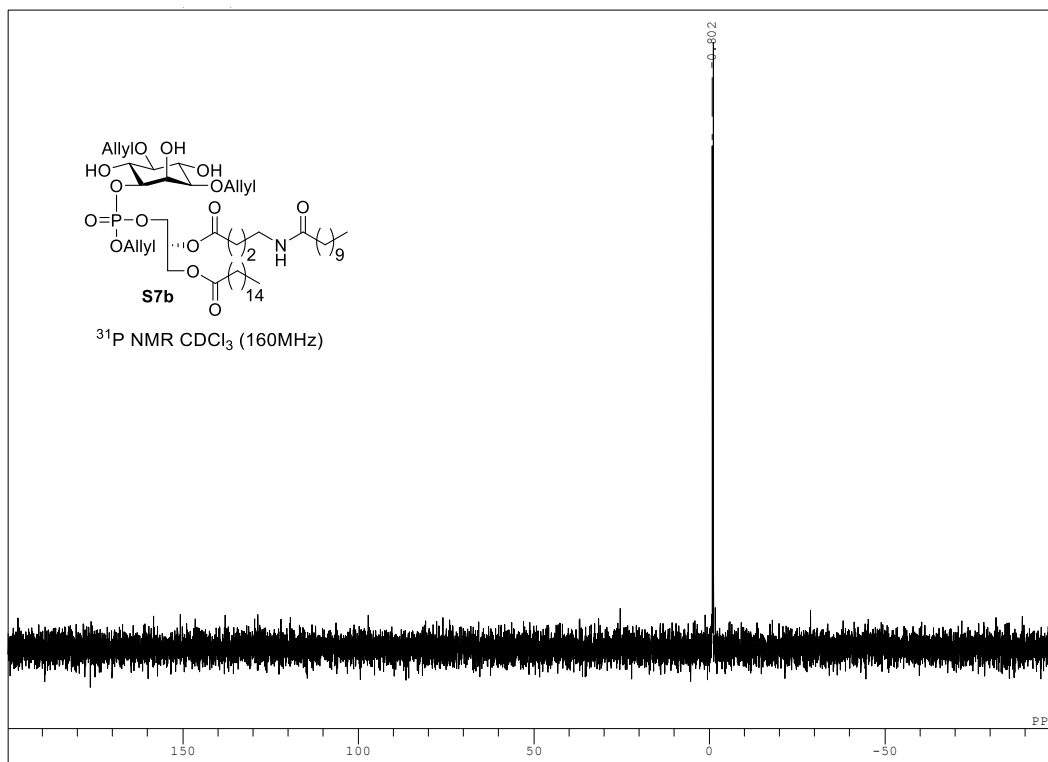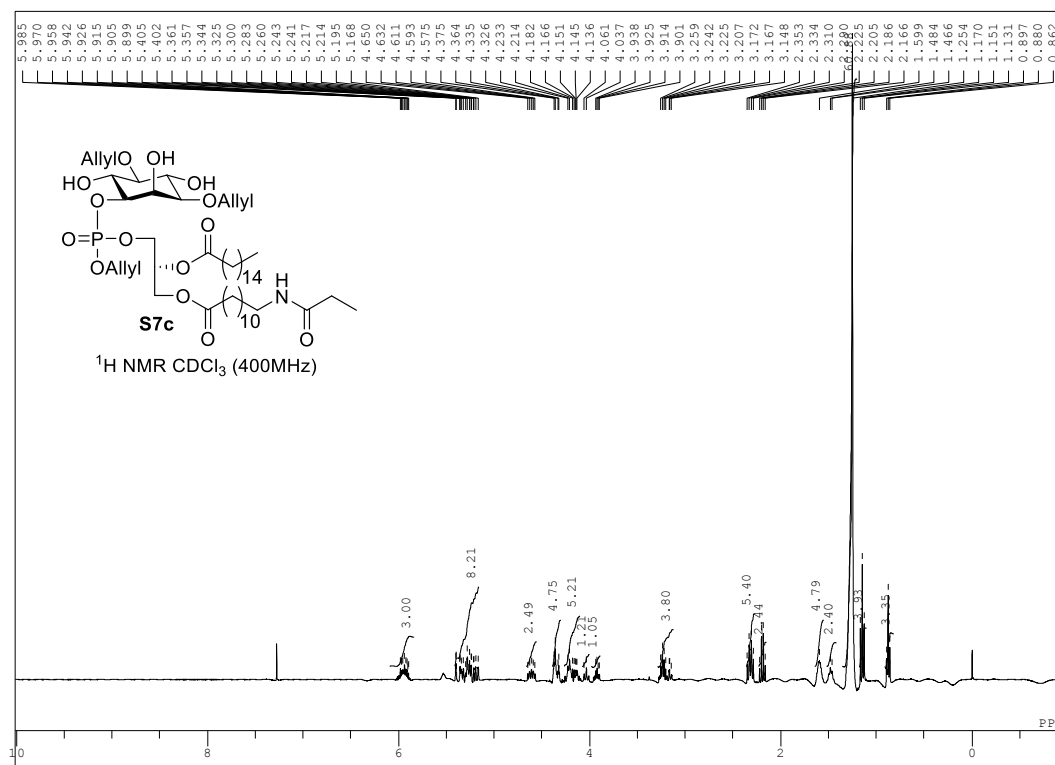

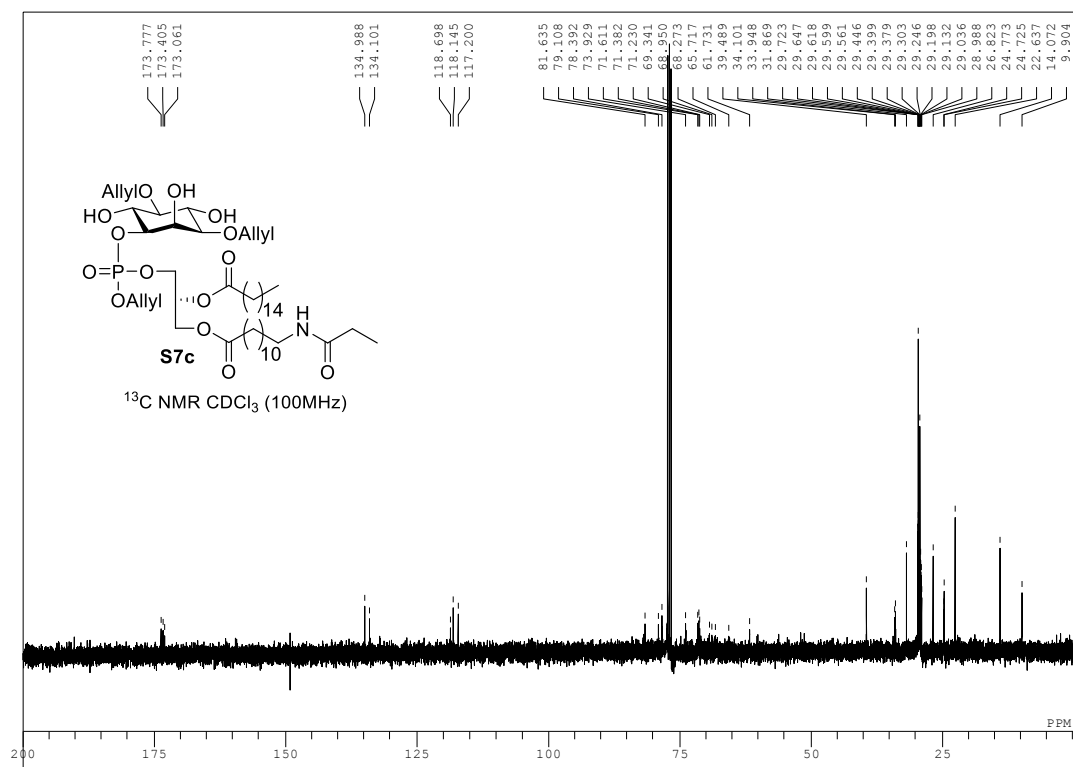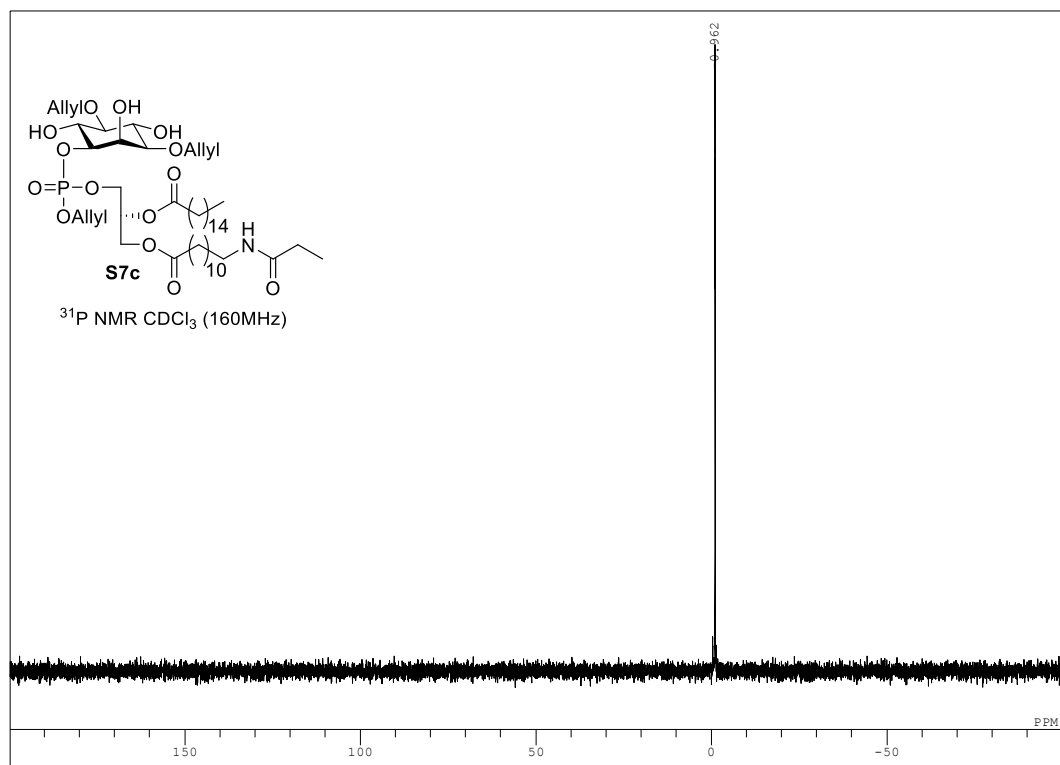

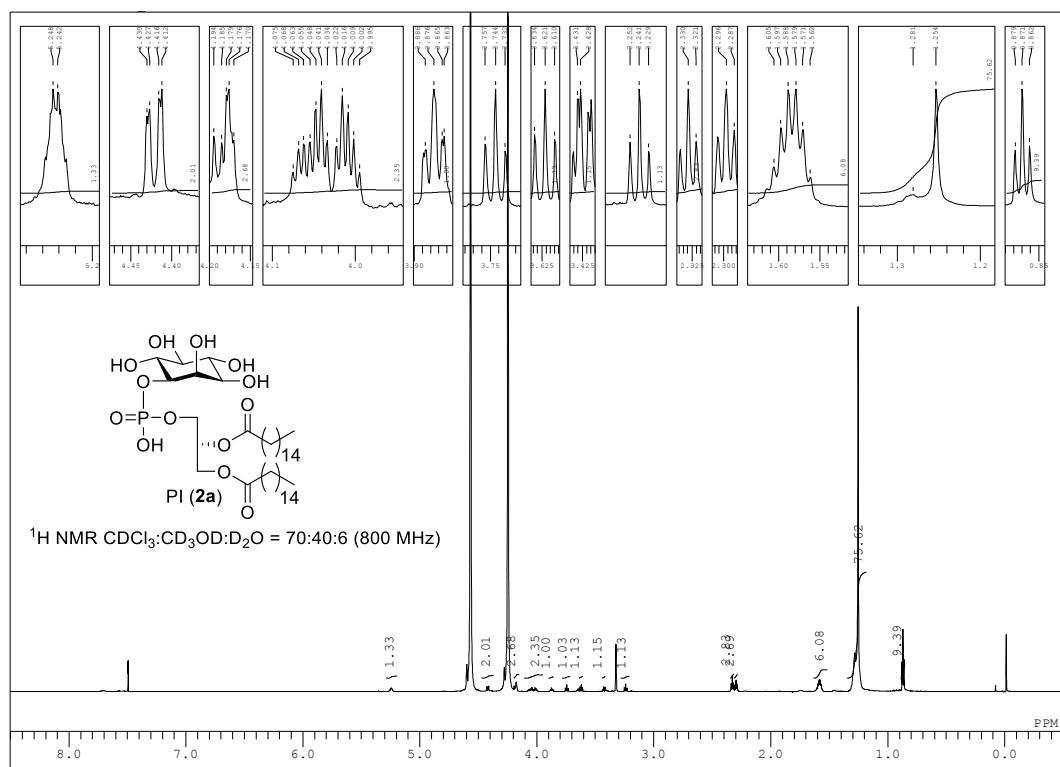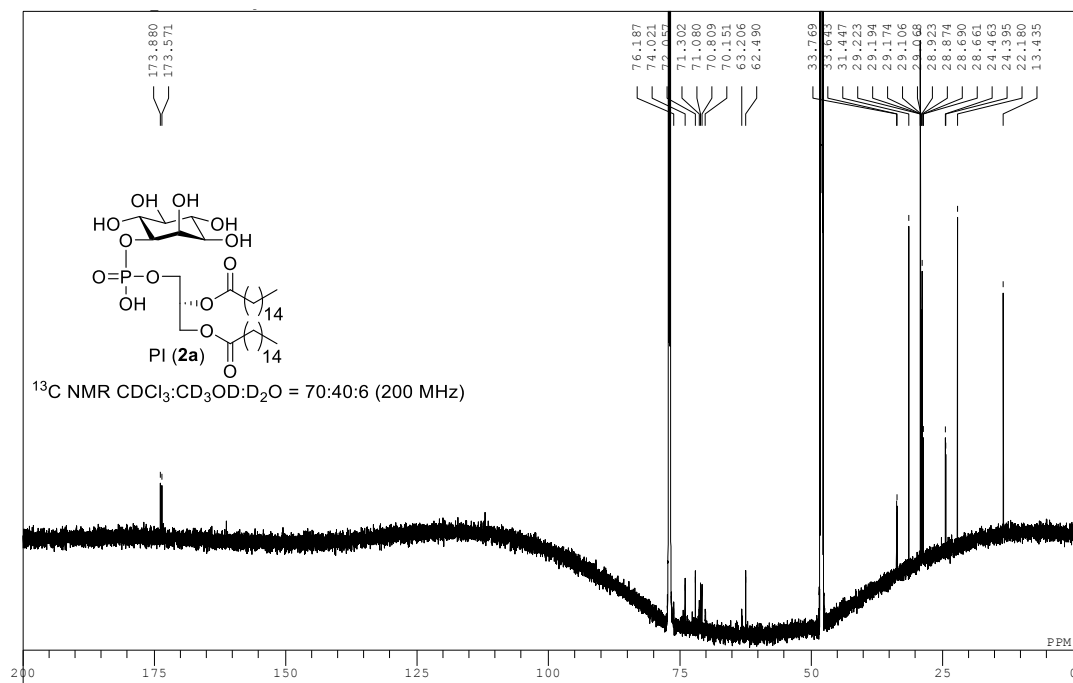



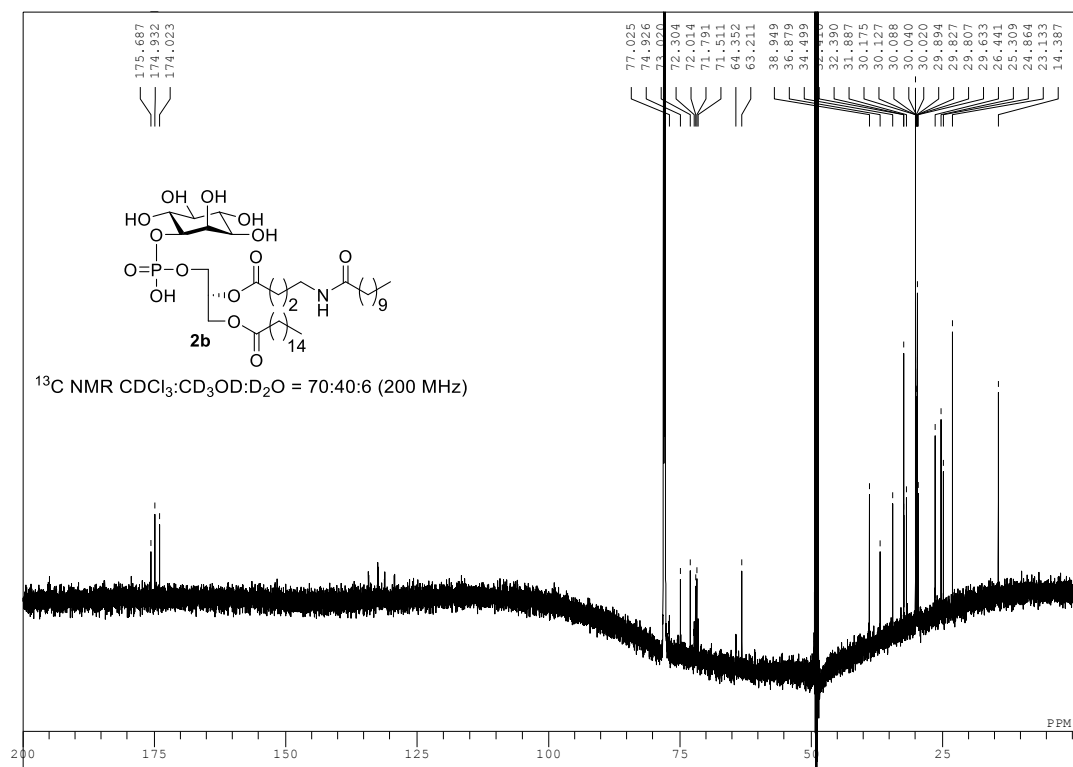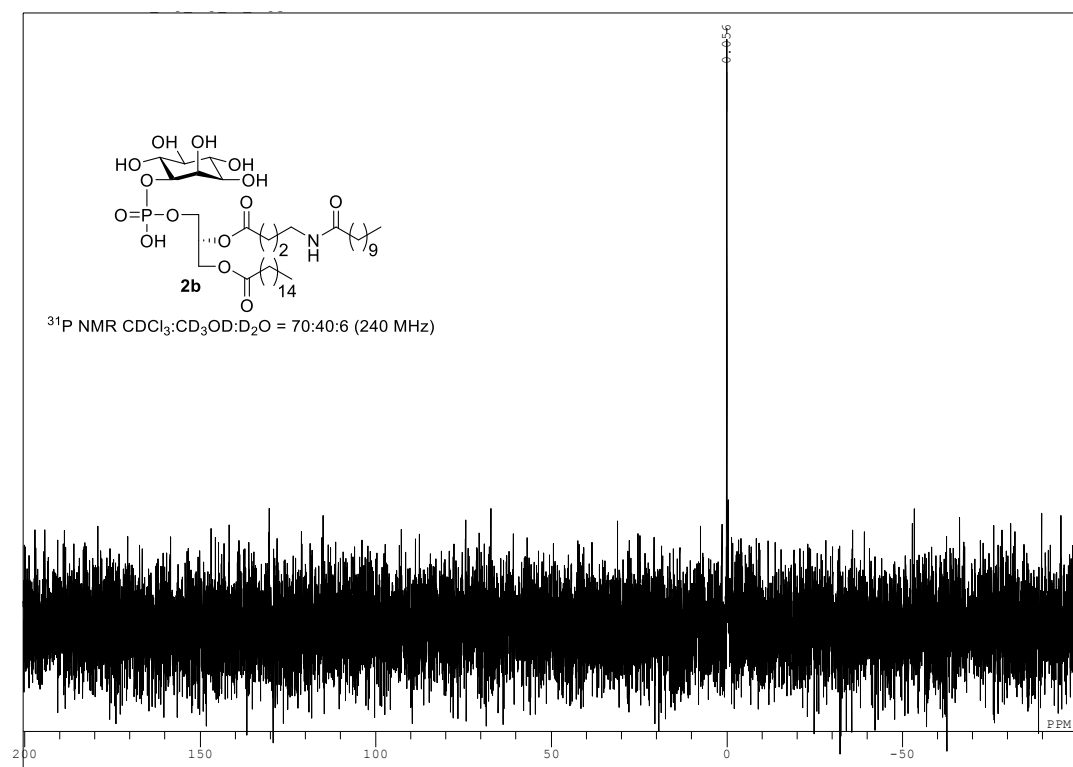



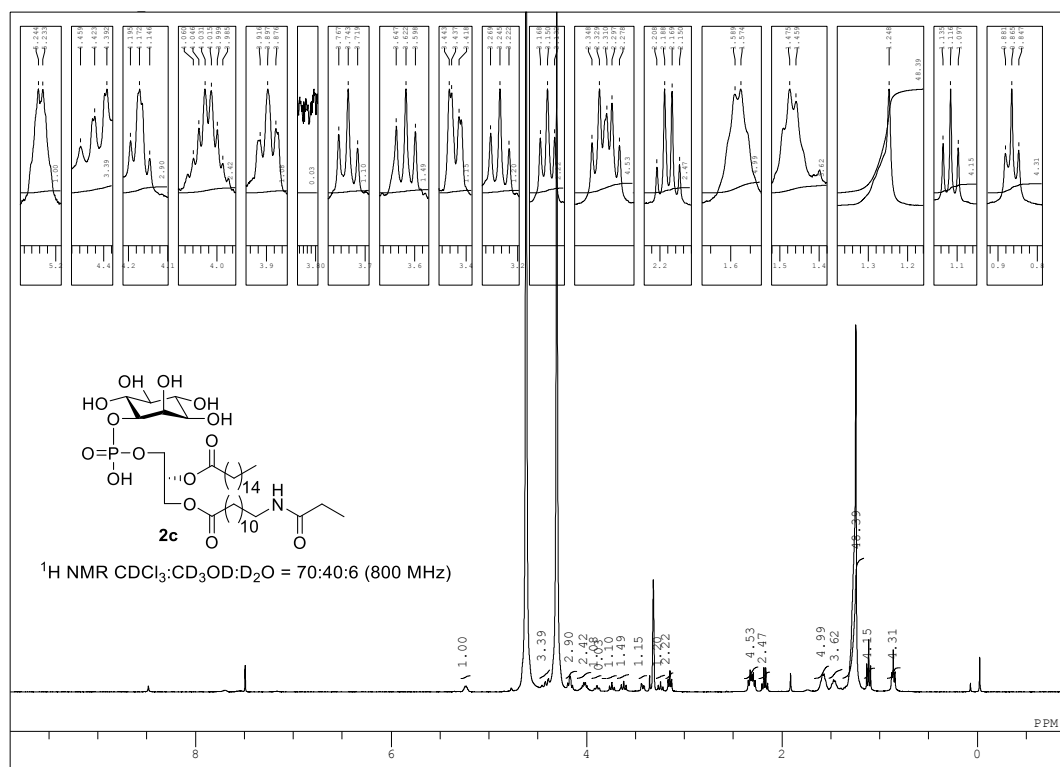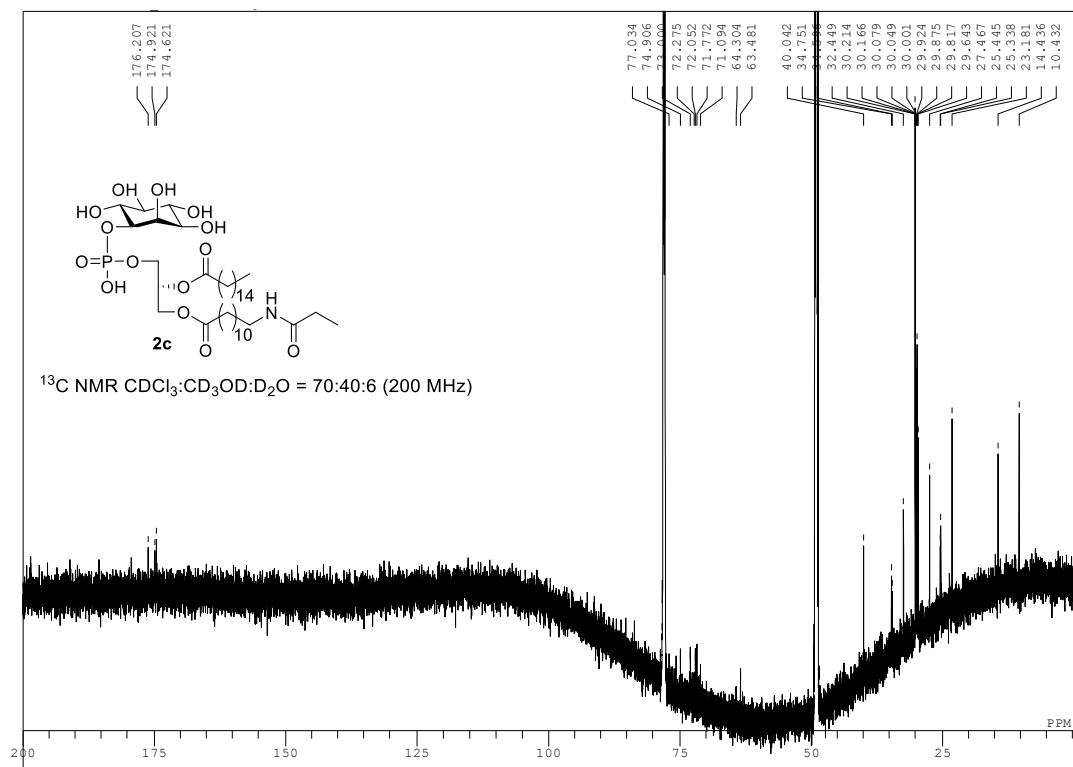

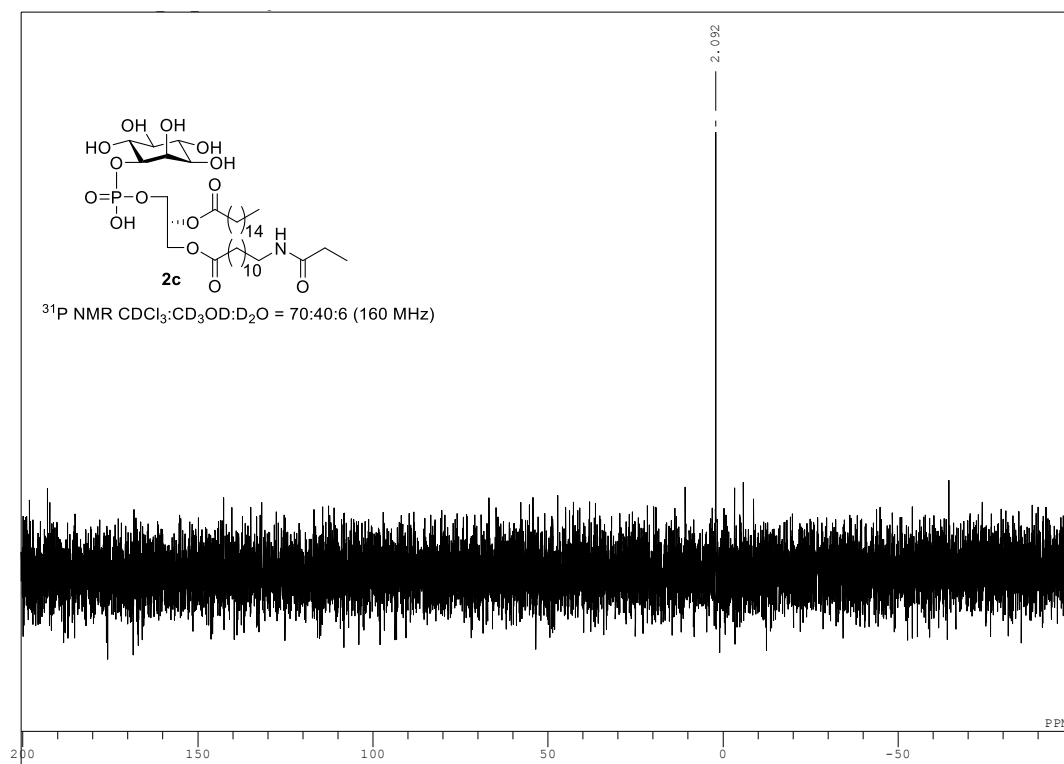

## Reference

1. S. Inuki, T. Aiba, N. Hirata, O. Ichihara, D. Yoshidome, S. Kita, K. Maenaka, K. Fukase and Y. Fujimoto, *ACS Chem. Biol.*, 2016, **11**, 3132-3139.
2. S. Zeissig, T. Olszak, E. Melum and R. S. Blumberg, *Methods Mol. Biol.*, 2013, **960**, 557-572.
3. Y. Arai, S. Inuki and Y. Fujimoto, *Bioorg. Med. Chem. Lett.*, 2018, **28**, 1638-1641.
4. S. Inuki, E. Kashiwabara, N. Hirata, J. Kishi, E. Nabika and Y. Fujimoto, *Angew. Chem. Int. Ed. Engl.*, 2018, **57**, 9655-9659.
5. T. Aiba, M. Sato, D. Umegaki, T. Iwasaki, N. Kambe, K. Fukase and Y. Fujimoto, *Org. Biomol. Chem.*, 2016, **14**, 6672-6675.
6. J. Sardinha, S. Guieu, A. Deleuze, M. C. Fernandez-Alonso, A. P. Rauter, P. Sinay, J. Marrot, J. Jimenez-Barbero and M. Sollogoub, *Carbohydr. Res.*, 2007, **342**, 1689-1703.
7. T. Aiba, S. Suehara, S.-L. Choy, Y. Maekawa, H. Lotter, T. Murai, S. Inuki, K. Fukase and Y. Fujimoto, *Chem. –Eur. J.*, 2017, **23**, 8304-8308.
8. W. Srisiri, H. G. Lamparski and D. F. O'Brien, *J. Org. Chem.*, 1996, **61**, 5911-5915.
9. S. Yamasaki, M. Matsumoto, O. Takeuchi, T. Matsuzawa, E. Ishikawa, M. Sakuma, H. Tateno, J. Uno, J. Hirabayashi, Y. Mikami, K. Takeda, S. Akira and T. Saito, *Proc. Natl. Acad. Sci. U. S. A.*, 2009, **106**, 1897-1902.
10. M. B. Richardson, S. Torigoe, S. Yamasaki and S. J. Williams, *Chem. Commun.*, 2015, **51**, 15027-15030.
11. K. Toyonaga, S. Torigoe, Y. Motomura, T. Kamichi, J. M. Hayashi, Y. S. Morita, N. Noguchi, Y. Chuma, H. Kiyohara, K. Matsuo, H. Tanaka, Y. Nakagawa, T. Sakuma, M. Ohmuraya, T. Yamamoto, M. Umemura, G. Matsuzaki, Y. Yoshikai, I. Yano, T. Miyamoto and S. Yamasaki, *Immunity*, 2016, **45**, 1245-1257.
12. D. Nyambayar, K. Iwabuchi, E. Hedlund, S. Murakawa, K. Shirai, C. Iwabuchi, Y. Kon, Y. Miyazaki, Y. Yanagawa, Ono, eacute and Kazunori, *J. Clin. Exp. Hematop.*, 2007, **47**, 1-8.
